# Supplementary material for: Peripheral substance P induces deficits in hippocampal synaptic plasticity and memory
Source: Mol Brain. 2025 Aug 16;18:69. doi: 10.1186/s13041-025-01242-6 (PMC12358064; doi:10.1186/s13041-025-01242-6)
Supplement: Supplementary file 1 — Supplementary Material 1: List of differentially expressed genes in the hippocampus of SP-treated mice [file 13041_2025_1242_MOESM1_ESM.xlsx]

## Sheet: DEG_list
gene_id	baseMean	log2FoldChange	lfcSE	pvalue	padj	gene_name	Change
ENSMUSG00000038775	106.145	1.05177	0.490929	0.000784024	0.0799481	Vill	Up
ENSMUSG00000034009	513.25	0.993851	0.187654	5.12766e-09	6.708e-05	Rxfp1	Up
ENSMUSG00000029335	137.074	0.979688	0.314203	6.19148e-05	0.026388	Bmp3	Up
ENSMUSG00000045648	201.1	0.935944	0.341447	0.00018918	0.0409996	Vwc2l	Up
ENSMUSG00000019997	274.996	0.880606	0.304061	0.00012291	0.0342108	Ccn2	Up
ENSMUSG00000021478	89.2716	0.84	0.345151	0.000428222	0.0622445	Drd1	Up
ENSMUSG00000026479	130.235	0.822935	0.447042	0.00140889	0.104722	Lamc2	None
ENSMUSG00000067578	316.433	0.785098	0.225007	1.7782e-05	0.0169948	Cbln4	Up
ENSMUSG00000024256	106.097	0.694597	0.32726	0.000893001	0.0844377	Adcyap1	Up
ENSMUSG00000048483	360.753	0.692252	0.194298	1.38295e-05	0.0150764	Zdhhc22	Up
ENSMUSG00000045314	77.8185	0.668883	0.35682	0.0014325	0.105263	Sowahb	None
ENSMUSG00000009378	123.357	0.666843	0.369228	0.00159561	0.110013	Slc16a12	None
ENSMUSG00000032006	179.333	0.663952	0.23397	0.000150202	0.0381247	Pdgfd	Up
ENSMUSG00000028883	101.107	0.651838	0.266989	0.000436526	0.0627542	Sema3a	Up
ENSMUSG00000057722	206.25	0.633687	0.293444	0.000821683	0.0826865	Lepr	Up
ENSMUSG00000033386	90.4068	0.625762	0.896157	0.00438014	0.196313	Frrs1	None
ENSMUSG00000005087	139.605	0.622722	0.301214	0.000994823	0.0903726	Cd44	Up
ENSMUSG00000021583	276.409	0.611432	0.182045	2.85087e-05	0.0223545	Erap1	Up
ENSMUSG00000005148	160.717	0.597512	0.297493	0.00112064	0.0922029	Klf5	Up
ENSMUSG00000030898	273.245	0.566483	0.182679	6.8518e-05	0.026388	Cckbr	Up
ENSMUSG00000004105	207.405	0.56367	0.360708	0.00235224	0.141446	Angptl2	None
ENSMUSG00000008999	320.757	0.561466	0.162686	2.10584e-05	0.0183657	Bmp7	Up
ENSMUSG00000020173	584.387	0.55485	0.193376	0.000138224	0.0361649	Cobl	Up
ENSMUSG00000014444	256.218	0.554183	0.198516	0.000172298	0.0407951	Piezo1	Up
ENSMUSG00000029334	130.392	0.553651	0.232826	0.000515897	0.0677723	Prkg2	Up
ENSMUSG00000046182	876.542	0.550793	0.118548	1.45224e-07	0.000949911	Gsg1l	Up
ENSMUSG00000027577	536.3	0.54318	0.125741	6.52977e-07	0.00284742	Chrna4	Up
ENSMUSG00000039031	215.613	0.538611	0.215415	0.000377644	0.0574457	Arhgap18	Up
ENSMUSG00000030111	362.437	0.528582	0.179567	0.000111781	0.0321267	A2m	Up
ENSMUSG00000017417	302.341	0.502504	0.177111	0.000154376	0.0381247	Plxdc1	Up
ENSMUSG00000047146	314.186	0.488995	0.1806	0.000222523	0.0441067	Tet1	Up
ENSMUSG00000036834	320.753	0.478019	0.172274	0.000185016	0.0409996	Plch1	Up
ENSMUSG00000022150	549.91	0.453656	0.264799	0.00193186	0.123885	Dab2	None
ENSMUSG00000063804	80.2057	0.438111	0.626533	0.00479049	0.204801	Lin28b	None
ENSMUSG00000040562	82.4719	0.436179	0.575717	0.00474703	0.204349	Gstm2	None
ENSMUSG00000034295	374.167	0.427138	0.192077	0.000751395	0.0787889	Fhod3	Up
ENSMUSG00000019917	179.086	0.424719	0.258227	0.00218476	0.135455	Sept10	None
ENSMUSG00000021217	325.719	0.424141	0.286545	0.0027263	0.156428	Tshz3	None
ENSMUSG00000039004	403.555	0.422819	0.196288	0.000875265	0.0844377	Bmp6	Up
ENSMUSG00000057440	133.498	0.41318	0.309687	0.00325997	0.17451	Mpp7	None
ENSMUSG00000022203	415.688	0.412603	0.153594	0.000243242	0.0457719	Efs	Up
ENSMUSG00000039252	1311.72	0.405072	0.109275	8.56194e-06	0.0150764	Lgi2	Up
ENSMUSG00000032172	920.273	0.404141	0.188037	0.000893009	0.0844377	Olfm2	Up
ENSMUSG00000062210	195.676	0.388162	0.295122	0.00336765	0.17679	Tnfaip8	None
ENSMUSG00000058152	144.129	0.384493	0.297004	0.00344501	0.17679	Chsy3	None
ENSMUSG00000022419	433.639	0.377903	0.195187	0.00135614	0.10196	Deptor	None
ENSMUSG00000042453	1994.06	0.375699	0.103359	1.13773e-05	0.0150764	Reln	Up
ENSMUSG00000032503	4254.52	0.374286	0.117283	5.6156e-05	0.026388	Arpp21	Up
ENSMUSG00000022206	760.828	0.373175	0.158989	0.000595527	0.0704015	Npr3	Up
ENSMUSG00000034912	841.032	0.372895	0.111426	3.22437e-05	0.0223545	Mdga2	Up
ENSMUSG00000049511	237.658	0.369684	0.179614	0.00110431	0.0920166	Htr1b	Up
ENSMUSG00000039735	1638.08	0.363019	0.140491	0.000337953	0.0539158	Fnbp1l	Up
ENSMUSG00000005583	3083.49	0.349556	0.104017	3.01182e-05	0.0223545	Mef2c	Up
ENSMUSG00000031654	244.865	0.344457	0.392996	0.00475287	0.204349	Cbln1	None
ENSMUSG00000031026	552.923	0.343619	0.162968	0.00100999	0.0903726	Trim66	Up
ENSMUSG00000035868	235.981	0.341934	0.218369	0.00256352	0.149714	Zfp983	None
ENSMUSG00000039007	374.486	0.341232	0.210139	0.00237348	0.141446	Cpq	None
ENSMUSG00000031285	715.095	0.340104	0.165705	0.00113508	0.0928067	Dcx	Up
ENSMUSG00000025531	1328.57	0.337793	0.101921	3.68596e-05	0.0224427	Chm	Up
ENSMUSG00000030560	343.793	0.337475	0.150647	0.000775506	0.0798832	Ctsc	Up
ENSMUSG00000055373	1907.53	0.33439	0.0951079	1.81874e-05	0.0169948	Fut9	Up
ENSMUSG00000026826	1276.12	0.330692	0.120693	0.000220049	0.0441067	Nr4a2	Up
ENSMUSG00000038252	556.92	0.32672	0.144115	0.000724126	0.0776477	Ncapd2	Up
ENSMUSG00000037664	282.557	0.32083	0.59397	0.00529061	0.215613	Cdkn1c	None
ENSMUSG00000031709	3377.3	0.314325	0.163584	0.00153397	0.108883	Tbc1d9	None
ENSMUSG00000030500	372.684	0.311179	0.256075	0.00393634	0.185356	Slc17a6	None
ENSMUSG00000041695	251.573	0.310147	0.194475	0.00255818	0.149714	Kcnj2	None
ENSMUSG00000062209	1549.13	0.308351	0.105843	0.000136979	0.0361649	Erbb4	Up
ENSMUSG00000026674	396.643	0.307585	0.205446	0.00291808	0.163138	Ddr2	None
ENSMUSG00000029090	657.145	0.306831	0.120198	0.000375179	0.0574457	Adgra3	Up
ENSMUSG00000051401	217.085	0.306343	0.340659	0.00487399	0.205835	Kctd16	None
ENSMUSG00000040167	663.477	0.290882	0.135894	0.00101052	0.0903726	Ikzf5	None
ENSMUSG00000087141	999.743	0.287308	0.136772	0.00108967	0.0920166	Plcxd2	None
ENSMUSG00000034518	417.469	0.285454	0.150501	0.00161354	0.110013	Hmgxb4	None
ENSMUSG00000063626	795.41	0.285389	0.174905	0.00248403	0.146379	Unc5d	None
ENSMUSG00000001985	1430.34	0.279782	0.100038	0.000200657	0.0423386	Grik3	None
ENSMUSG00000064065	748.583	0.279189	0.120734	0.000701404	0.0773622	Ipcef1	None
ENSMUSG00000036502	894.911	0.273715	0.200038	0.00360079	0.179792	Tmem255a	None
ENSMUSG00000052155	1558.89	0.270072	0.112423	0.000553667	0.0696449	Acvr2a	None
ENSMUSG00000029516	1512.38	0.266827	0.184723	0.00327289	0.17451	Cit	None
ENSMUSG00000016150	1261.7	0.264512	0.138823	0.00163985	0.110013	Tenm1	None
ENSMUSG00000025534	294.315	0.258117	0.199524	0.00394877	0.185356	Gusb	None
ENSMUSG00000006641	527.334	0.256801	0.248933	0.0048481	0.205835	Slc5a6	None
ENSMUSG00000032224	3051.54	0.25617	0.11406	0.000840452	0.0839297	Fam81a	None
ENSMUSG00000019590	1217.54	0.246386	0.163377	0.00313558	0.171631	Cyb561	None
ENSMUSG00000002997	890.877	0.245418	0.10626	0.000748641	0.0787889	Prkar2b	None
ENSMUSG00000022377	1895.48	0.245168	0.101691	0.000581701	0.0704015	Asap1	None
ENSMUSG00000060798	423.989	0.240162	0.161494	0.00328036	0.17451	Intu	None
ENSMUSG00000022261	991.868	0.231149	0.110401	0.00122051	0.0970812	Sdc2	None
ENSMUSG00000025246	1346.24	0.230956	0.0854254	0.000285699	0.0504492	Tbl1x	None
ENSMUSG00000028572	2046.88	0.229427	0.0727115	7.26164e-05	0.026388	Hook1	None
ENSMUSG00000025647	1006.11	0.228026	0.093128	0.000551556	0.0696449	Shisa5	None
ENSMUSG00000037475	1506.31	0.226726	0.0915634	0.000518057	0.0677723	Thoc2	None
ENSMUSG00000056158	935.86	0.226193	0.136504	0.00267871	0.154374	Car10	None
ENSMUSG00000042834	1519.64	0.224641	0.175831	0.00439843	0.196313	Nrep	None
ENSMUSG00000018800	1330.87	0.224494	0.0894987	0.000478898	0.0651729	Abca5	None
ENSMUSG00000079065	286.908	0.223551	0.322074	0.00597071	0.2314	BC005561	None
ENSMUSG00000094410	1469.74	0.220222	0.0823038	0.000316269	0.0523726	Gm38394	None
ENSMUSG00000020044	2709.32	0.218612	0.11223	0.00167635	0.110841	Timp3	None
ENSMUSG00000035236	1928.99	0.218242	0.0760234	0.000180927	0.0409996	Scai	None
ENSMUSG00000054640	7009.53	0.217766	0.059254	1.19815e-05	0.0150764	Slc8a1	None
ENSMUSG00000030237	1152.19	0.212324	0.109542	0.00174043	0.113841	Slco1a4	None
ENSMUSG00000001300	1000.01	0.21114	0.25631	0.00651088	0.233357	Efnb2	None
ENSMUSG00000027340	4122.12	0.210909	0.0979558	0.00114995	0.0934384	Slc23a2	None
ENSMUSG00000026904	6046.29	0.209691	0.0887747	0.00071555	0.0773622	Slc4a10	None
ENSMUSG00000021301	1196.59	0.208047	0.0956871	0.00109635	0.0920166	Hecw1	None
ENSMUSG00000037458	3165.07	0.205253	0.083032	0.000571371	0.0704015	Azin1	None
ENSMUSG00000116275	1830.27	0.204028	0.163835	0.00476429	0.204349	Zc3h11a	None
ENSMUSG00000028832	4896.18	0.203924	0.0932235	0.00108332	0.0920166	Stmn1	None
ENSMUSG00000031591	1031.73	0.200848	0.110226	0.00221947	0.136958	Asah1	None
ENSMUSG00000058318	1377.78	0.199872	0.129467	0.00342798	0.17679	Phf21a	None
ENSMUSG00000031561	2622.29	0.197855	0.0960642	0.00144835	0.105263	Tenm3	None
ENSMUSG00000024347	1710.91	0.193878	0.166434	0.00527001	0.215445	Psd2	None
ENSMUSG00000003949	3062.03	0.190727	0.0826467	0.000875016	0.0844377	Hlf	None
ENSMUSG00000035033	1172.63	0.190471	0.0937321	0.00159286	0.110013	Tbr1	None
ENSMUSG00000054976	575.201	0.190015	0.158065	0.00520195	0.213329	Nyap2	None
ENSMUSG00000027834	4488.66	0.189899	0.126429	0.003834	0.184399	Serpini1	None
ENSMUSG00000019775	1193.9	0.188279	0.141393	0.00462274	0.203484	Rgs17	None
ENSMUSG00000037573	874.989	0.188192	0.107843	0.00265775	0.154374	Tob1	None
ENSMUSG00000044676	1229.23	0.186181	0.0908078	0.00153978	0.108883	Zfp612	None
ENSMUSG00000033910	848.839	0.186063	0.119842	0.00358601	0.179792	Gucy1a1	None
ENSMUSG00000025937	424.82	0.185729	0.20318	0.00624402	0.2314	Lactb2	None
ENSMUSG00000039782	1687.14	0.184887	0.100819	0.00236071	0.141446	Cpeb2	None
ENSMUSG00000055296	2338.47	0.177877	0.100702	0.00267813	0.154374	Tmem245	None
ENSMUSG00000009207	900.416	0.175454	0.122918	0.00435436	0.196313	Lnpk	None
ENSMUSG00000063663	537.382	0.175446	0.214387	0.00680973	0.237318	Brwd3	None
ENSMUSG00000079056	1934.86	0.173761	0.121868	0.00442222	0.196313	Kcnip3	None
ENSMUSG00000002265	8215.16	0.171961	0.0862942	0.00185931	0.11982	Peg3	None
ENSMUSG00000041592	567.821	0.171632	0.149924	0.0058029	0.227286	Sdk2	None
ENSMUSG00000029167	1247.03	0.171326	0.109224	0.00372589	0.183241	Ppargc1a	None
ENSMUSG00000039579	1189.4	0.17003	0.223921	0.00698981	0.237508	Grin3a	None
ENSMUSG00000033282	712.933	0.168578	0.159207	0.00631928	0.23287	Rpgrip1l	None
ENSMUSG00000025949	1346.22	0.164494	0.0969124	0.00321246	0.173659	Pikfyve	None
ENSMUSG00000033578	979.72	0.164414	0.119416	0.00495848	0.206638	Tmem35a	None
ENSMUSG00000058740	2121.34	0.162172	0.138089	0.00601528	0.2314	Kcnt1	None
ENSMUSG00000048960	1499.96	0.161768	0.138462	0.00602677	0.2314	Prex2	None
ENSMUSG00000022537	1482.89	0.160577	0.147247	0.00639719	0.233357	Tmem44	None
ENSMUSG00000053110	641.38	0.158251	0.191399	0.00738625	0.244131	Yap1	None
ENSMUSG00000023927	2078.21	0.157636	0.0980662	0.0038621	0.18507	Satb1	None
ENSMUSG00000041112	1240.55	0.156921	0.13447	0.00620602	0.2314	Elmo1	None
ENSMUSG00000073678	742.435	0.155448	0.266471	0.00766069	0.244773	Pgap1	None
ENSMUSG00000071862	1529.96	0.153868	0.0949883	0.00392502	0.185356	Lrrtm2	None
ENSMUSG00000094724	641.989	0.15129	0.1709	0.00760878	0.244773	Rnaset2b	None
ENSMUSG00000025321	1484.72	0.151207	0.11199	0.00548501	0.220107	Itgb8	None
ENSMUSG00000019818	1686.43	0.151056	0.110338	0.00537895	0.218532	Cd164	None
ENSMUSG00000044308	4696.27	0.150935	0.0672538	0.00128584	0.0989488	Ubr3	None
ENSMUSG00000005034	7680.8	0.15062	0.0985685	0.00464143	0.203484	Prkacb	None
ENSMUSG00000025958	1307.88	0.14988	0.103346	0.00495592	0.206638	Creb1	None
ENSMUSG00000038530	3077.16	0.149132	0.0755396	0.00226953	0.138738	Rgs4	None
ENSMUSG00000019841	1279.84	0.14709	0.125764	0.0066755	0.236605	Rev3l	None
ENSMUSG00000062590	826.914	0.146888	0.145416	0.00733259	0.2439	Armc9	None
ENSMUSG00000019817	827.126	0.143964	0.129306	0.0072273	0.24296	Plagl1	None
ENSMUSG00000000594	1292.28	0.143962	0.12399	0.0068679	0.237508	Gm2a	None
ENSMUSG00000031284	3157.6	0.141511	0.073981	0.00276558	0.157988	Pak3	None
ENSMUSG00000090100	2384.17	0.140512	0.0838523	0.00393704	0.185356	Ttbk2	None
ENSMUSG00000021047	1029.81	0.138627	0.140665	0.00797156	0.247662	Nova1	None
ENSMUSG00000026384	2037.69	0.137993	0.107031	0.00648885	0.233357	Ptpn4	None
ENSMUSG00000034593	9497.69	0.134756	0.0520016	0.000606717	0.0704015	Myo5a	None
ENSMUSG00000040537	5311.2	0.134047	0.0706067	0.00288695	0.16209	Adam22	None
ENSMUSG00000037259	4372.94	0.131302	0.0984529	0.00675503	0.236605	Dzank1	None
ENSMUSG00000003452	1065.07	0.130794	0.133751	0.00868955	0.255453	Bicd1	None
ENSMUSG00000007989	1966.92	0.13014	0.106724	0.00743265	0.244306	Fzd3	None
ENSMUSG00000028403	1283.35	0.129568	0.0981689	0.00682094	0.237318	Zdhhc21	None
ENSMUSG00000030313	1575.34	0.128913	0.105559	0.00748866	0.244773	Dennd5b	None
ENSMUSG00000032009	3004.86	0.127055	0.0735639	0.00413514	0.190479	Sesn3	None
ENSMUSG00000026623	5113.02	0.125038	0.0703091	0.00396619	0.185356	Lpgat1	None
ENSMUSG00000063142	6723.77	0.12422	0.0690483	0.003824	0.184399	Kcnma1	None
ENSMUSG00000026259	1970.33	0.122876	0.0928743	0.00732741	0.2439	Ngef	None
ENSMUSG00000030757	1211.28	0.122145	0.135822	0.00970026	0.271151	Zkscan2	None
ENSMUSG00000041215	1194.64	0.122133	0.131306	0.00963452	0.270469	Yeats2	None
ENSMUSG00000028034	3623.95	0.121029	0.0955837	0.00796867	0.247662	Fubp1	None
ENSMUSG00000030861	1622.58	0.120303	0.13988	0.00989281	0.273822	Acadsb	None
ENSMUSG00000007891	8261.64	0.119736	0.117546	0.00955353	0.269934	Ctsd	None
ENSMUSG00000026365	841.787	0.117259	0.216488	0.0101077	0.275477	Cfh	None
ENSMUSG00000027692	6029.73	0.117044	0.0577493	0.00282673	0.160084	Tnik	None
ENSMUSG00000033295	1775.25	0.115508	0.117175	0.0101381	0.27573	Ptprf	None
ENSMUSG00000030306	1651.45	0.114551	0.100681	0.00945661	0.268938	Tmtc1	None
ENSMUSG00000025404	3550.02	0.10931	0.0912775	0.0098108	0.272494	R3hdm2	None
ENSMUSG00000036452	2056.41	0.109004	0.133726	0.0113843	0.294911	Arhgap26	None
ENSMUSG00000022762	1216.42	0.105898	0.129838	0.0118543	0.301612	Ncam2	None
ENSMUSG00000064367	97422.2	0.103813	0.102817	0.0143758	0.328937	mt-Nd5	None
ENSMUSG00000060371	5458.41	0.101302	0.0766366	0.00998364	0.273822	Caln1	None
ENSMUSG00000035847	10088.9	0.101248	0.0695563	0.00867277	0.255453	Ids	None
ENSMUSG00000020048	7518.4	0.0977236	0.0668218	0.00937321	0.26773	Hsp90b1	None
ENSMUSG00000015222	27937	0.0964593	0.0629441	0.00861292	0.255029	Map2	None
ENSMUSG00000038664	6053.95	0.0956954	0.0640832	0.00948113	0.26905	Herc1	None
ENSMUSG00000034275	1677.59	0.0933688	0.0987822	0.0144126	0.328937	Igsf9b	None
ENSMUSG00000021171	1307.58	0.0924558	0.107266	0.0147387	0.333009	Esyt2	None
ENSMUSG00000005871	7401.66	0.0880522	0.0679735	0.0137625	0.325813	Apc	None
ENSMUSG00000024926	1214.59	0.087703	0.159181	0.0139811	0.325813	Kat5	None
ENSMUSG00000045095	1774.26	0.0857626	0.0976069	0.0168299	0.350419	Magi1	None
ENSMUSG00000027677	5237.94	0.0844028	0.0801737	0.0169022	0.350419	Ttc14	None
ENSMUSG00000020070	2112.13	0.083556	0.100074	0.0175251	0.354896	Rufy2	None
ENSMUSG00000055567	8299.78	0.0830758	0.103769	0.017769	0.358028	Unc80	None
ENSMUSG00000044647	2056.05	0.0820926	0.112681	0.0173197	0.354267	Csrnp3	None
ENSMUSG00000064061	2440.87	0.0782508	0.0825359	0.0202858	0.373071	Dzip3	None
ENSMUSG00000046699	961.853	0.0782503	0.171552	0.0137961	0.325813	Slitrk4	None
ENSMUSG00000027797	15244.3	0.0780218	0.059368	0.0176877	0.357085	Dclk1	None
ENSMUSG00000048078	4306.4	0.0773134	0.133134	0.0165653	0.350419	Tenm4	None
ENSMUSG00000049100	2486.61	0.0767546	0.103137	0.0194958	0.366443	Pcdh10	None
ENSMUSG00000028399	4821.01	0.0759007	0.0840735	0.0211925	0.3824	Ptprd	None
ENSMUSG00000034723	4872.4	0.0758078	0.0714034	0.0224136	0.389302	Tmx4	None
ENSMUSG00000021259	3195.12	0.0757843	0.116946	0.0183794	0.36131	Cyp46a1	None
ENSMUSG00000071379	872.138	0.075465	0.241239	0.0113135	0.294803	Hpcal1	None
ENSMUSG00000028618	3469.99	0.0748004	0.0893	0.021483	0.384569	Tmem59	None
ENSMUSG00000066324	2718.86	0.0740895	0.0777629	0.0224009	0.389302	Impad1	None
ENSMUSG00000050587	1918.83	0.0740499	0.149872	0.0150455	0.335225	Lrrc4c	None
ENSMUSG00000039195	1352.71	0.0723858	0.122607	0.0178439	0.358028	1110008P14Rik	None
ENSMUSG00000032261	776.589	0.0721177	0.169006	0.0133084	0.320037	Sh3bgrl2	None
ENSMUSG00000029212	4986.29	0.0713208	0.0645419	0.0235948	0.394971	Gabrb1	None
ENSMUSG00000025982	7633.75	0.0704397	0.0626508	0.0239992	0.395826	Sf3b1	None
ENSMUSG00000024384	1126.55	0.0694533	0.122712	0.0182589	0.36131	Iws1	None
ENSMUSG00000032047	1866.37	0.0682374	0.0978865	0.0221634	0.387616	Acat1	None
ENSMUSG00000030824	1814.91	0.0675633	0.0869694	0.0248531	0.402754	Nucb1	None
ENSMUSG00000057715	1584.87	0.067195	0.0901448	0.024329	0.397344	A830018L16Rik	None
ENSMUSG00000000078	703.599	0.0665398	0.19234	0.0105184	0.279679	Klf6	None
ENSMUSG00000028173	906.55	0.0655203	0.12202	0.019283	0.366044	Wls	None
ENSMUSG00000069662	3115.39	0.0655185	0.112396	0.0195937	0.367227	Marcks	None
ENSMUSG00000024072	965.863	0.0648467	0.102174	0.0211792	0.3824	Yipf4	None
ENSMUSG00000058690	2863.78	0.0637085	0.0710409	0.0303236	0.440623	Ccser2	None
ENSMUSG00000021670	2036.88	0.0632902	0.0969283	0.0244729	0.399188	Hmgcr	None
ENSMUSG00000025104	2430.89	0.0615965	0.0750777	0.0319652	0.450128	Hdgfl3	None
ENSMUSG00000042323	1482.21	0.0614096	0.0932303	0.026324	0.412079	Pbrm1	None
ENSMUSG00000042249	3511.89	0.06087	0.0862882	0.0288958	0.432427	Grk3	None
ENSMUSG00000075318	6679.86	0.060641	0.058791	0.0352259	0.468319	Scn2a	None
ENSMUSG00000031626	3167.82	0.060053	0.0926903	0.0287215	0.430888	Sorbs2	None
ENSMUSG00000022816	936.621	0.0596644	0.101206	0.0240245	0.395826	Fstl1	None
ENSMUSG00000022974	1545.17	0.0596424	0.0795865	0.0314839	0.447201	Paxbp1	None
ENSMUSG00000025809	1462.29	0.0596049	0.0922369	0.0249526	0.403	Itgb1	None
ENSMUSG00000052534	3409.15	0.059131	0.0639138	0.0350255	0.467582	Pbx1	None
ENSMUSG00000042688	859.569	0.0581806	0.113574	0.0162928	0.348258	Mapk6	None
ENSMUSG00000087403	843.423	0.057979	0.109447	0.0173557	0.354267	Kantr	None
ENSMUSG00000021775	2159.55	0.0579468	0.0720112	0.0359262	0.469932	Nr1d2	None
ENSMUSG00000047414	1389.04	0.0576213	0.103138	0.0182071	0.36131	Flrt2	None
ENSMUSG00000032199	3530.58	0.0572906	0.0859186	0.0350275	0.467582	Polr2m	None
ENSMUSG00000029108	1854.02	0.0569397	0.106197	0.0176155	0.356175	Pcdh7	None
ENSMUSG00000037049	2210.71	0.0568502	0.0736074	0.0358053	0.469932	Smpd1	None
ENSMUSG00000020366	4319.34	0.056546	0.0614615	0.0381496	0.479316	Mapk9	None
ENSMUSG00000061665	850.381	0.056285	0.0993589	0.0190536	0.364947	Cd2ap	None
ENSMUSG00000025666	2709.11	0.0562299	0.0791918	0.0402529	0.493394	Tmem47	None
ENSMUSG00000039988	1828.44	0.0559529	0.0776331	0.0328737	0.456603	Ankrd13c	None
ENSMUSG00000032512	2073.78	0.0557588	0.0648568	0.0376109	0.475927	Wdr48	None
ENSMUSG00000032115	2616.6	0.0545119	0.0692516	0.0377496	0.476287	Hyou1	None
ENSMUSG00000030759	2606.44	0.0544722	0.0703621	0.0419057	0.500192	Far1	None
ENSMUSG00000022378	2662.38	0.0543101	0.0753411	0.0432287	0.507285	Fam49b	None
ENSMUSG00000037855	7111.13	0.0542137	0.0665691	0.0407343	0.495247	Zfp365	None
ENSMUSG00000031327	1041.89	0.0541991	0.082484	0.0291362	0.432427	Chic1	None
ENSMUSG00000026361	1185.61	0.0535279	0.0831373	0.0286566	0.430408	Cdc73	None
ENSMUSG00000021730	2295.33	0.0531472	0.0898069	0.0230534	0.392688	Hcn1	None
ENSMUSG00000040125	4148.83	0.0527026	0.0663043	0.0463011	0.516818	Gpr26	None
ENSMUSG00000037646	1784.63	0.052479	0.077666	0.0280231	0.424795	Vps13b	None
ENSMUSG00000064125	1092.8	0.0524172	0.0964424	0.0167577	0.350419	Prr36	None
ENSMUSG00000096188	3361.5	0.0520663	0.0695923	0.0437473	0.507285	Cmtm4	None
ENSMUSG00000037795	441.949	0.0515652	0.101161	0.0134676	0.320797	N4bp2	None
ENSMUSG00000031864	1674.14	0.051416	0.0696621	0.0534105	0.551332	Ints10	None
ENSMUSG00000024483	1661.42	0.0506201	0.0785994	0.0306509	0.441394	Ankhd1	None
ENSMUSG00000071337	4183.38	0.0506108	0.0593819	0.0449311	0.50883	Tia1	None
ENSMUSG00000003226	3301.95	0.0503536	0.0611279	0.043756	0.507285	Ranbp2	None
ENSMUSG00000038759	881.04	0.0502403	0.077058	0.0295002	0.434597	Nup205	None
ENSMUSG00000027864	370.241	0.0501082	0.101608	0.00859796	0.255029	Ptgfrn	None
ENSMUSG00000036499	1409.78	0.0499033	0.0672431	0.0441341	0.507285	Eea1	None
ENSMUSG00000031214	1451.2	0.0497731	0.0718791	0.037505	0.475426	Ophn1	None
ENSMUSG00000025266	4762.45	0.0497049	0.0585677	0.0898184	0.640465	Gnl3l	None
ENSMUSG00000024897	4371.15	0.0496382	0.0575841	0.0527827	0.55059	Apba1	None
ENSMUSG00000021196	6196.5	0.0495151	0.0609816	0.058078	0.565195	Pfkp	None
ENSMUSG00000043300	768.294	0.0493411	0.0810459	0.0263197	0.412079	B3galnt1	None
ENSMUSG00000064345	100530	0.0493149	0.0878688	0.134238	0.726103	mt-Nd2	None
ENSMUSG00000026915	3650.44	0.0492237	0.0616181	0.0618526	0.575797	Strbp	None
ENSMUSG00000025757	4099.14	0.049119	0.0666222	0.0756255	0.606646	Hspa4l	None
ENSMUSG00000107705	772.413	0.0486461	0.0978629	0.00727517	0.243411	Gm45062	None
ENSMUSG00000019810	830.595	0.04845	0.0795225	0.0240868	0.395826	Fuca2	None
ENSMUSG00000040612	3518.36	0.0482527	0.0584308	0.0591124	0.567001	Ildr2	None
ENSMUSG00000023169	4031.29	0.0480144	0.0556043	0.0708096	0.598792	Slc38a1	None
ENSMUSG00000044252	3080.46	0.0478722	0.0639751	0.0502564	0.537346	Osbpl1a	None
ENSMUSG00000022119	1732.05	0.0477554	0.0654274	0.0756337	0.606646	Rbm26	None
ENSMUSG00000023004	14502.8	0.0477417	0.0587425	0.0520101	0.546503	Tuba1b	None
ENSMUSG00000062373	1419.93	0.0476203	0.0705503	0.0361789	0.469932	Tmem65	None
ENSMUSG00000074582	2066.89	0.0475381	0.0732237	0.0346505	0.466835	Arfgef2	None
ENSMUSG00000058013	2148.03	0.0475166	0.0694246	0.0313944	0.446901	Sept11	None
ENSMUSG00000046447	16652.3	0.0474864	0.0452945	0.0653392	0.586023	Camk2n1	None
ENSMUSG00000025903	651.052	0.0474633	0.0855716	0.0144183	0.328937	Lypla1	None
ENSMUSG00000026344	2216.04	0.0471554	0.0690459	0.0397548	0.492492	Lypd1	None
ENSMUSG00000032525	4679.08	0.0471241	0.062655	0.0425566	0.504411	Nktr	None
ENSMUSG00000066735	1890.16	0.0470021	0.0638837	0.0479194	0.527234	Vkorc1l1	None
ENSMUSG00000075592	405.116	0.0467666	0.0902058	0.00994621	0.273822	Nynrin	None
ENSMUSG00000044349	60767.2	0.0465811	0.0648312	0.0584386	0.565195	Snhg11	None
ENSMUSG00000062604	4314.66	0.0464823	0.0524762	0.072019	0.602992	Srpk2	None
ENSMUSG00000021820	4069.45	0.0464478	0.0565427	0.0696827	0.59674	Camk2g	None
ENSMUSG00000021794	5263.85	0.0464379	0.0568681	0.070979	0.599062	Glud1	None
ENSMUSG00000063273	1503.42	0.0460569	0.0645231	0.0473423	0.523528	Naa15	None
ENSMUSG00000036814	710.365	0.0460138	0.0827554	0.0142768	0.328242	Slc6a20a	None
ENSMUSG00000038860	858.811	0.0453622	0.0813173	0.0182514	0.36131	Garnl3	None
ENSMUSG00000042408	1414.26	0.0452974	0.0710237	0.033531	0.459803	Zmym6	None
ENSMUSG00000039126	1678.71	0.0452336	0.0662323	0.0439565	0.507285	Prune2	None
ENSMUSG00000024127	8827.49	0.0451735	0.0481443	0.0675142	0.589596	Prepl	None
ENSMUSG00000036570	809.834	0.0450188	0.0803135	0.0151274	0.335526	Fxyd1	None
ENSMUSG00000072294	613.861	0.0449347	0.0848973	0.0100265	0.274407	Klf12	None
ENSMUSG00000021248	3285.59	0.0447474	0.0573476	0.10141	0.665652	Tmed10	None
ENSMUSG00000051146	974.206	0.044673	0.0797077	0.0150069	0.335016	Camk2n2	None
ENSMUSG00000020189	2012.74	0.04452	0.0588218	0.0851419	0.626449	Osbpl8	None
ENSMUSG00000055254	12924.8	0.0443007	0.0498447	0.0973542	0.655812	Ntrk2	None
ENSMUSG00000022661	1856.63	0.0440907	0.0680775	0.0393916	0.490554	Cd200	None
ENSMUSG00000020088	2676.38	0.0438317	0.0589575	0.0613762	0.573927	Sar1a	None
ENSMUSG00000031310	4568.6	0.0436943	0.0502465	0.0655649	0.586503	Zmym3	None
ENSMUSG00000030465	13576.5	0.0435754	0.0479767	0.0836669	0.622882	Psd3	None
ENSMUSG00000003847	3694.09	0.0433036	0.0568061	0.104547	0.672529	Nfat5	None
ENSMUSG00000025579	8604.89	0.0425988	0.0571058	0.0560519	0.562593	Gaa	None
ENSMUSG00000022533	1930.89	0.0425227	0.0623639	0.0439757	0.507285	Atp13a3	None
ENSMUSG00000034248	790.905	0.0424551	0.0662649	0.0373232	0.47514	Slc25a37	None
ENSMUSG00000040265	3111.06	0.0422896	0.0541406	0.0684364	0.592271	Dnm3	None
ENSMUSG00000022865	820.433	0.0422407	0.0661257	0.0359953	0.469932	Cxadr	None
ENSMUSG00000028826	1475.52	0.04209	0.0592345	0.0563888	0.563113	Maco1	None
ENSMUSG00000020473	638.305	0.0420116	0.0723581	0.0202594	0.373071	Aebp1	None
ENSMUSG00000020859	8152.85	0.0419086	0.0442713	0.081645	0.621959	Spag9	None
ENSMUSG00000033849	1429.44	0.0418977	0.071546	0.018927	0.364658	B3galt2	None
ENSMUSG00000027479	1977.16	0.0418152	0.0650936	0.0410826	0.496065	Mapre1	None
ENSMUSG00000029208	1265.12	0.0417569	0.0636451	0.0443912	0.507285	Guf1	None
ENSMUSG00000021704	1581.2	0.0415927	0.0578563	0.0612745	0.573796	Mtx3	None
ENSMUSG00000040943	1084.46	0.0415635	0.0648948	0.0386887	0.482944	Tet2	None
ENSMUSG00000006494	1463.51	0.0415233	0.0645318	0.0408742	0.495373	Pdk1	None
ENSMUSG00000022812	3886.6	0.0415063	0.0496986	0.0841945	0.623456	Gsk3b	None
ENSMUSG00000028381	1674.18	0.0414764	0.0555035	0.0672558	0.589402	Ugcg	None
ENSMUSG00000042460	499.766	0.0411747	0.0697711	0.0239183	0.395574	C1galt1	None
ENSMUSG00000043388	3500.9	0.0409812	0.0649385	0.0327083	0.456603	Tmem130	None
ENSMUSG00000037788	1526.01	0.0409405	0.0643832	0.0376172	0.475927	Vopp1	None
ENSMUSG00000069520	794.375	0.0408824	0.066882	0.0315613	0.447484	Tmem19	None
ENSMUSG00000034160	10688.5	0.0407684	0.0462409	0.0940832	0.652484	Ogt	None
ENSMUSG00000021488	4108.3	0.0403669	0.0529105	0.0659301	0.586658	Nsd1	None
ENSMUSG00000028788	3438.75	0.0402684	0.0600726	0.0546838	0.556277	Ptp4a2	None
ENSMUSG00000047045	474.878	0.0398614	0.0722689	0.0100574	0.274679	Tmem164	None
ENSMUSG00000038630	777.744	0.0398414	0.0650296	0.0347162	0.466969	Zkscan16	None
ENSMUSG00000036879	945.53	0.0398135	0.0639772	0.0394387	0.490554	Phkb	None
ENSMUSG00000067336	4210.04	0.0397751	0.0485812	0.104964	0.672529	Bmpr2	None
ENSMUSG00000000567	725.527	0.0397307	0.0645616	0.0360708	0.469932	Sox9	None
ENSMUSG00000021000	1213.24	0.0395081	0.0599134	0.0527846	0.55059	Mia2	None
ENSMUSG00000061911	5394.88	0.0394547	0.0530452	0.0758845	0.60754	Myt1l	None
ENSMUSG00000030605	3213.42	0.0394376	0.0595328	0.0551619	0.558587	Mfge8	None
ENSMUSG00000027763	1860.77	0.0393683	0.0545525	0.109106	0.679358	Mbnl1	None
ENSMUSG00000043991	1081.3	0.0392757	0.0677434	0.0202596	0.373071	Pura	None
ENSMUSG00000036949	1117.64	0.0390034	0.0607085	0.044801	0.508443	Slc39a12	None
ENSMUSG00000053141	2826.12	0.038925	0.06312	0.0434086	0.507285	Ptprt	None
ENSMUSG00000025959	1295.26	0.0384985	0.0604503	0.0441101	0.507285	Klf7	None
ENSMUSG00000025544	2754.24	0.03837	0.0495745	0.0898374	0.640465	Tm9sf2	None
ENSMUSG00000051379	836.146	0.0382466	0.0619898	0.0355756	0.469626	Flrt3	None
ENSMUSG00000019820	1362.19	0.0380734	0.0625773	0.032431	0.454446	Utrn	None
ENSMUSG00000062627	907.381	0.0378462	0.0610743	0.0435397	0.507285	Mysm1	None
ENSMUSG00000021111	2874.76	0.0378046	0.0516769	0.0873231	0.634645	Papola	None
ENSMUSG00000020326	1641.73	0.0375859	0.0537136	0.0733334	0.60417	Ccng1	None
ENSMUSG00000024713	425.121	0.0375601	0.0664557	0.0139912	0.325813	Pcsk5	None
ENSMUSG00000064368	1460.08	0.0375202	0.0636596	0.0260525	0.411617	mt-Nd6	None
ENSMUSG00000015882	576.14	0.0375045	0.0642614	0.0231314	0.392994	Lcorl	None
ENSMUSG00000026017	525.335	0.0373474	0.0648338	0.0201588	0.373071	Carf	None
ENSMUSG00000054459	8141.93	0.0372387	0.0497921	0.065712	0.586503	Vsnl1	None
ENSMUSG00000025986	3367.88	0.0371758	0.0501887	0.0721216	0.603257	Slc39a10	None
ENSMUSG00000023921	949.263	0.0370563	0.0630035	0.0278594	0.423295	Mmut	None
ENSMUSG00000095432	272.057	0.0370293	0.0676017	0.00734572	0.2439	Zfp748	None
ENSMUSG00000026123	4562.79	0.0369556	0.04761	0.0987294	0.658297	Plekhb2	None
ENSMUSG00000072946	944.763	0.0368575	0.0587558	0.0495343	0.534987	Ptgr2	None
ENSMUSG00000025240	1741.57	0.03684	0.051335	0.0869388	0.633201	Sacm1l	None
ENSMUSG00000032279	4455.64	0.036661	0.0452881	0.114494	0.689601	Idh3a	None
ENSMUSG00000054942	2802.54	0.0364375	0.0477901	0.0769676	0.609187	Miga1	None
ENSMUSG00000026965	1849.19	0.0363882	0.0547019	0.0689909	0.594167	Anapc2	None
ENSMUSG00000025950	999.533	0.0362755	0.0564453	0.0572867	0.564755	Idh1	None
ENSMUSG00000020657	3059.28	0.0362524	0.0482045	0.10881	0.679118	Dnajc27	None
ENSMUSG00000053580	4004.41	0.0362483	0.0545728	0.0703144	0.598413	Tanc2	None
ENSMUSG00000021700	9482.79	0.0361522	0.0601366	0.0267172	0.414608	Rab3c	None
ENSMUSG00000036093	2565.91	0.0361122	0.048472	0.0791119	0.614209	Arl5a	None
ENSMUSG00000040359	853.593	0.0361055	0.0587099	0.0449631	0.50883	Ufl1	None
ENSMUSG00000045294	1423.73	0.036065	0.0545388	0.0706438	0.598413	Insig1	None
ENSMUSG00000022416	1790.44	0.0360413	0.0552169	0.0639622	0.582134	Cacna1i	None
ENSMUSG00000034687	828.231	0.036035	0.0618655	0.0242033	0.395932	Fras1	None
ENSMUSG00000032743	999.97	0.0360236	0.0560979	0.0584201	0.565195	D430042O09Rik	None
ENSMUSG00000056900	601.65	0.0359986	0.0618151	0.0248756	0.402754	Usp13	None
ENSMUSG00000036617	1834.53	0.0359895	0.0646262	0.0119372	0.302142	Etl4	None
ENSMUSG00000046873	749.012	0.0359267	0.0601234	0.026823	0.415264	Mbtps2	None
ENSMUSG00000026193	1806.43	0.0357187	0.0625714	0.0213217	0.383253	Fn1	None
ENSMUSG00000023110	1382.05	0.0356574	0.0518647	0.0732123	0.60417	Prmt5	None
ENSMUSG00000025823	988.594	0.03563	0.0600107	0.031709	0.447484	Pdia4	None
ENSMUSG00000027751	1186.18	0.0355877	0.0579178	0.043916	0.507285	Supt20	None
ENSMUSG00000031708	6460.45	0.0355137	0.0447147	0.0955352	0.654157	Tecr	None
ENSMUSG00000021587	672.013	0.0354728	0.0619076	0.0213276	0.383253	Pcsk1	None
ENSMUSG00000073664	668.174	0.0354427	0.0622631	0.0168123	0.350419	Nbeal1	None
ENSMUSG00000037234	2235.59	0.0354414	0.0520087	0.0836614	0.622882	Hook3	None
ENSMUSG00000038708	2559.26	0.0353931	0.0466042	0.111658	0.685138	Golga4	None
ENSMUSG00000038545	754.82	0.0353474	0.0620487	0.0206032	0.375337	Cul7	None
ENSMUSG00000030275	9610.27	0.0352242	0.0425855	0.128249	0.716378	Etnk1	None
ENSMUSG00000062949	620.767	0.0351749	0.0639586	0.00892915	0.261322	Atp11c	None
ENSMUSG00000028546	1501.78	0.0351462	0.0640891	0.00811651	0.249343	Elavl4	None
ENSMUSG00000092083	567.345	0.0350684	0.0609136	0.023598	0.394971	Kcnb2	None
ENSMUSG00000028086	3679.27	0.0350078	0.0491709	0.0945093	0.652484	Fbxw7	None
ENSMUSG00000042302	1227.68	0.0350029	0.0531625	0.076554	0.609187	Ehbp1	None
ENSMUSG00000025609	2513.48	0.0349618	0.0515888	0.0837557	0.622882	Mkln1	None
ENSMUSG00000003992	1495.43	0.0349115	0.058375	0.0431304	0.507285	Ssbp2	None
ENSMUSG00000033965	1926.96	0.0349045	0.0594084	0.0351388	0.468296	Slc16a2	None
ENSMUSG00000029705	1001.15	0.0348724	0.0568271	0.0530333	0.55059	Cux1	None
ENSMUSG00000031870	407.795	0.034865	0.0615799	0.016417	0.349214	Pgr	None
ENSMUSG00000006369	349.021	0.0348086	0.0626202	0.0113351	0.294803	Fbln1	None
ENSMUSG00000010663	4792.85	0.0347948	0.0443349	0.141477	0.740913	Fads1	None
ENSMUSG00000070695	867.401	0.0347442	0.0557976	0.0568245	0.563592	Cntnap5a	None
ENSMUSG00000074785	1453.56	0.0346992	0.0604144	0.0194622	0.366443	Plxnc1	None
ENSMUSG00000027087	1002.15	0.034647	0.0541393	0.0695671	0.59674	Itgav	None
ENSMUSG00000021936	2161.5	0.0345968	0.0532598	0.0717857	0.602374	Mapk8	None
ENSMUSG00000030657	1645.69	0.0345747	0.0533819	0.0724449	0.603501	Xylt1	None
ENSMUSG00000022494	1549.63	0.0345718	0.0564004	0.0469711	0.521602	Shisa9	None
ENSMUSG00000043252	1103.85	0.0345478	0.0546928	0.0633744	0.579781	Tmem64	None
ENSMUSG00000036766	2942.29	0.0343651	0.0538533	0.0705578	0.598413	Dner	None
ENSMUSG00000041935	1716.37	0.0343307	0.0514844	0.0834891	0.622882	AW549877	None
ENSMUSG00000027194	983.825	0.0343209	0.0531717	0.0743484	0.605782	Ttc17	None
ENSMUSG00000024664	903.867	0.0342977	0.0591027	0.0271448	0.416306	Fads3	None
ENSMUSG00000048939	292.957	0.0342071	0.0612598	0.0132979	0.320037	Atp13a5	None
ENSMUSG00000031095	1154.37	0.0341553	0.0605869	0.0123659	0.306966	Cul4b	None
ENSMUSG00000033883	696.458	0.0340909	0.0598388	0.0229713	0.391799	Zfp267	None
ENSMUSG00000063796	427.602	0.0340407	0.0599737	0.0204429	0.37403	Slc22a8	None
ENSMUSG00000022636	3082.33	0.0339328	0.0560025	0.0454647	0.510963	Alcam	None
ENSMUSG00000037434	907.347	0.0339146	0.056814	0.0461661	0.515751	Slc30a1	None
ENSMUSG00000030884	4153.49	0.0339085	0.0463128	0.111529	0.684985	Uqcrc2	None
ENSMUSG00000058624	5227.01	0.0339058	0.0555088	0.0724523	0.603501	Gda	None
ENSMUSG00000028518	847.304	0.0338992	0.0550626	0.0578847	0.565195	Prkaa2	None
ENSMUSG00000060802	1614.78	0.0338301	0.0519544	0.0806073	0.617459	B2m	None
ENSMUSG00000041444	4055.57	0.0338232	0.0546125	0.0619259	0.575797	Arhgap32	None
ENSMUSG00000040724	4679.77	0.0338191	0.0443779	0.0945014	0.652484	Kcna2	None
ENSMUSG00000029810	536.499	0.0337865	0.0585061	0.0373623	0.47514	Tmem176b	None
ENSMUSG00000037935	1214.25	0.0337555	0.0557937	0.0434553	0.507285	Smarce1	None
ENSMUSG00000047789	627.133	0.0337156	0.0570024	0.0360399	0.469932	Slc38a9	None
ENSMUSG00000021192	614.892	0.0336226	0.0553659	0.051282	0.541899	Golga5	None
ENSMUSG00000028082	1058.24	0.0334375	0.0597981	0.0155975	0.341215	Sh3d19	None
ENSMUSG00000008200	1574.17	0.0333844	0.0531136	0.0706941	0.598413	Fnbp4	None
ENSMUSG00000001173	2161.57	0.0333714	0.0478067	0.103879	0.670092	Ocrl	None
ENSMUSG00000027676	846.802	0.0333708	0.0564704	0.0402888	0.493394	Ccdc39	None
ENSMUSG00000031007	4183.61	0.0333256	0.0511461	0.0838477	0.622882	Atp6ap2	None
ENSMUSG00000069769	2729.16	0.0332699	0.0508582	0.0783538	0.612321	Msi2	None
ENSMUSG00000027962	869.997	0.0332391	0.0602291	0.0120806	0.30392	Vcam1	None
ENSMUSG00000060314	510.658	0.0332317	0.0609296	0.00800803	0.247662	Zfp941	None
ENSMUSG00000042742	641.457	0.0330013	0.0551371	0.047788	0.526571	Bmt2	None
ENSMUSG00000032890	1490.25	0.0329672	0.0594354	0.0163454	0.348258	Rims3	None
ENSMUSG00000035629	1857.02	0.0329471	0.0475158	0.10855	0.679118	Rubcn	None
ENSMUSG00000031824	5232.79	0.0329282	0.0454637	0.11684	0.697019	6430548M08Rik	None
ENSMUSG00000027520	725.886	0.0327804	0.0593194	0.0148385	0.33411	Zdbf2	None
ENSMUSG00000039801	1799.73	0.0324996	0.0483381	0.10501	0.672529	Cplane1	None
ENSMUSG00000046311	845.095	0.0323844	0.0521426	0.0791634	0.614244	Zfp62	None
ENSMUSG00000020644	1657.83	0.0323217	0.0543927	0.0418484	0.499964	Id2	None
ENSMUSG00000041245	801.383	0.0322437	0.0524321	0.0664289	0.58837	Wnk3	None
ENSMUSG00000111375	2704.26	0.0321529	0.0486491	0.110056	0.682229	Btbd8	None
ENSMUSG00000021686	1419.38	0.0320956	0.0504708	0.0853065	0.626833	Ap3b1	None
ENSMUSG00000032481	1464.89	0.0320763	0.0509367	0.0738621	0.604876	Smarcc1	None
ENSMUSG00000022376	524.475	0.0320698	0.0578396	0.0157623	0.342529	Adcy8	None
ENSMUSG00000043419	1908.72	0.0320673	0.0529187	0.0627188	0.579032	Rnf227	None
ENSMUSG00000093930	4594.21	0.0320439	0.0435934	0.133118	0.724394	Hmgcs1	None
ENSMUSG00000025195	342.843	0.0319863	0.0575047	0.0192974	0.366044	Dnmbp	None
ENSMUSG00000063362	747.236	0.0319675	0.052794	0.0669254	0.589402	Alg11	None
ENSMUSG00000023175	9250.27	0.0318991	0.0498696	0.0938256	0.652484	Bsg	None
ENSMUSG00000050840	377.36	0.0318662	0.0567166	0.0232124	0.393347	Cdh20	None
ENSMUSG00000026469	2855.51	0.0318035	0.0468684	0.119643	0.699825	Xpr1	None
ENSMUSG00000056429	4185.41	0.0317916	0.0491121	0.101919	0.665652	Tgoln1	None
ENSMUSG00000032181	4933.94	0.0316686	0.0440699	0.125689	0.712039	Scg3	None
ENSMUSG00000018395	3317.05	0.0316221	0.0441209	0.136319	0.729079	Kif3a	None
ENSMUSG00000015217	302.378	0.031561	0.0580061	0.0104498	0.278635	Hmgb3	None
ENSMUSG00000030616	863.594	0.0315571	0.0541185	0.0472735	0.523528	Sytl2	None
ENSMUSG00000032238	912.87	0.031545	0.0527294	0.0626751	0.579032	Rora	None
ENSMUSG00000032076	4569.55	0.031484	0.0544332	0.0505218	0.537776	Cadm1	None
ENSMUSG00000056537	1436.35	0.0314633	0.0490578	0.0730109	0.60417	Rlim	None
ENSMUSG00000020122	413.857	0.0312987	0.0562864	0.0245512	0.399476	Egfr	None
ENSMUSG00000042444	1748.13	0.0312473	0.0462377	0.113573	0.687556	Mindy2	None
ENSMUSG00000061718	1642.28	0.031191	0.0565564	0.0184815	0.361938	Ppp1r1b	None
ENSMUSG00000020102	949.263	0.0310981	0.0557594	0.0241919	0.395932	Slc16a7	None
ENSMUSG00000043067	1709.87	0.0310378	0.0515913	0.0723992	0.603501	Dpy19l1	None
ENSMUSG00000022136	1664.53	0.031025	0.0517354	0.0676946	0.589622	Dnajc3	None
ENSMUSG00000028889	384.994	0.0308859	0.0554066	0.025915	0.411617	Yrdc	None
ENSMUSG00000031755	635.296	0.0308492	0.0545185	0.0341232	0.464515	Bbs2	None
ENSMUSG00000049866	958.498	0.0307906	0.0527586	0.0529038	0.55059	Arl4c	None
ENSMUSG00000038828	1788	0.030778	0.0493614	0.0972654	0.655552	Tmem214	None
ENSMUSG00000054387	2898.5	0.0307015	0.0506795	0.0885805	0.635925	Mdm4	None
ENSMUSG00000042743	1983.57	0.0306275	0.0465777	0.117714	0.69711	Sgtb	None
ENSMUSG00000035934	1020.68	0.0305886	0.0533322	0.0505667	0.537816	Pknox2	None
ENSMUSG00000005886	2414.19	0.0305807	0.0462385	0.118352	0.69711	Ncoa2	None
ENSMUSG00000050079	626.011	0.0305794	0.0524861	0.053983	0.554438	Rspry1	None
ENSMUSG00000045193	1259.76	0.030454	0.0499231	0.0830904	0.622403	Cirbp	None
ENSMUSG00000010517	702.118	0.0303663	0.0517423	0.0673558	0.589402	Faf1	None
ENSMUSG00000017677	2572.1	0.0302147	0.0491347	0.0984134	0.657194	Wsb1	None
ENSMUSG00000059708	659.247	0.0302006	0.0528233	0.0496568	0.534987	Akap17b	None
ENSMUSG00000036790	778.329	0.0301583	0.0504448	0.0732655	0.60417	Slitrk2	None
ENSMUSG00000038301	2770.08	0.0301563	0.0459686	0.123891	0.709812	Snx10	None
ENSMUSG00000021366	1042.6	0.0301318	0.0548692	0.02177	0.385902	Hivep1	None
ENSMUSG00000073131	1266.36	0.0300098	0.0486682	0.136226	0.729079	Vma21	None
ENSMUSG00000032590	511.098	0.0299944	0.0543774	0.0257815	0.411617	Apeh	None
ENSMUSG00000044071	1364.06	0.0299309	0.0491961	0.0748477	0.606646	Tafa2	None
ENSMUSG00000029291	4169.62	0.029904	0.0399732	0.174495	0.789059	Rufy3	None
ENSMUSG00000041417	2282.82	0.0298468	0.0456242	0.120843	0.703232	Pik3r1	None
ENSMUSG00000007812	710.649	0.0298343	0.0508396	0.0672768	0.589402	Zfp655	None
ENSMUSG00000079509	605.589	0.0297353	0.0531048	0.040118	0.493394	Zfx	None
ENSMUSG00000020961	849.895	0.0296963	0.0525967	0.0471763	0.523017	Ston2	None
ENSMUSG00000026200	279.685	0.0296912	0.0551036	0.013847	0.325813	Glb1l	None
ENSMUSG00000026434	3236	0.0295918	0.0427971	0.15208	0.753245	Nucks1	None
ENSMUSG00000026790	2532.56	0.0295888	0.046317	0.0909308	0.643263	Odf2	None
ENSMUSG00000022075	1816.03	0.029569	0.0477043	0.103054	0.669058	Rhobtb2	None
ENSMUSG00000023960	5290.45	0.0294285	0.0413382	0.158205	0.760797	Enpp5	None
ENSMUSG00000020427	468.084	0.0293984	0.0534832	0.0292773	0.432427	Igfbp3	None
ENSMUSG00000021448	566.656	0.0293616	0.050863	0.064181	0.582896	Shc3	None
ENSMUSG00000022747	285.498	0.0293266	0.0547527	0.0134871	0.320797	St3gal6	None
ENSMUSG00000043384	12435.2	0.0293155	0.0440138	0.143033	0.741981	Gprasp1	None
ENSMUSG00000021245	688.812	0.0293075	0.0501631	0.0768287	0.609187	Mlh3	None
ENSMUSG00000005802	1305.02	0.0292837	0.0475546	0.105639	0.67326	Slc30a4	None
ENSMUSG00000042182	2037.76	0.0292393	0.0490666	0.0939742	0.652484	Bend6	None
ENSMUSG00000027737	1415.96	0.0292307	0.051261	0.065317	0.586023	Slc7a11	None
ENSMUSG00000029135	1143.37	0.0291972	0.0499293	0.0770639	0.609187	Fosl2	None
ENSMUSG00000031256	2646.31	0.029166	0.0468575	0.117448	0.69711	Cstf2	None
ENSMUSG00000038538	1878.23	0.0291333	0.0466859	0.117247	0.69711	Ubn2	None
ENSMUSG00000038807	4152.94	0.0291195	0.0430662	0.133823	0.725226	Rap1gap2	None
ENSMUSG00000022523	1849.63	0.0291029	0.051683	0.0366559	0.472237	Fgf12	None
ENSMUSG00000025475	1385.94	0.0290903	0.0525098	0.0374106	0.47514	Adgra1	None
ENSMUSG00000032293	1748	0.0290898	0.045509	0.129537	0.718051	Ireb2	None
ENSMUSG00000055407	2357.82	0.029052	0.046474	0.123731	0.709812	Map6	None
ENSMUSG00000020634	963.134	0.0290398	0.048036	0.103743	0.669874	Ubxn2a	None
ENSMUSG00000034667	2397.5	0.0290115	0.0497017	0.0765413	0.609187	Xpot	None
ENSMUSG00000057880	6583.82	0.0289749	0.0444046	0.139305	0.734536	Abat	None
ENSMUSG00000001366	1507.69	0.0289527	0.0455635	0.133683	0.725226	Fbxo9	None
ENSMUSG00000026787	3164.84	0.0289064	0.0507917	0.0660562	0.586658	Gad2	None
ENSMUSG00000021244	3280.03	0.0288968	0.0431184	0.162824	0.768679	Ylpm1	None
ENSMUSG00000034310	367.25	0.0288668	0.0546288	0.00861665	0.255029	Tmem132d	None
ENSMUSG00000042532	1697.01	0.0288608	0.0451903	0.12554	0.712039	Golga7b	None
ENSMUSG00000038370	1400.89	0.0288389	0.0498963	0.088893	0.636159	Pcp4l1	None
ENSMUSG00000055430	5543.32	0.0288294	0.0522915	0.0489364	0.532448	Nap1l5	None
ENSMUSG00000024498	1860.68	0.028826	0.0460359	0.119905	0.700578	Tcerg1	None
ENSMUSG00000020776	2151.85	0.0288117	0.0483799	0.0945252	0.652484	Fbf1	None
ENSMUSG00000019984	965.167	0.0288032	0.048398	0.0911647	0.643266	Med23	None
ENSMUSG00000036062	6389.37	0.0287555	0.0429109	0.157749	0.76066	Phf24	None
ENSMUSG00000042846	419.553	0.028744	0.0538919	0.0148204	0.33411	Lrrtm3	None
ENSMUSG00000041650	675.247	0.0287437	0.0504297	0.0655965	0.586503	Pcca	None
ENSMUSG00000040006	402.554	0.0287035	0.053032	0.0242123	0.395932	Ginm1	None
ENSMUSG00000036257	2699.23	0.028618	0.0423318	0.158874	0.761011	Pnpla8	None
ENSMUSG00000031592	2099.37	0.0286067	0.0431611	0.231096	0.837524	Pcm1	None
ENSMUSG00000007653	1926.87	0.0285372	0.0458571	0.124982	0.711496	Gabrb2	None
ENSMUSG00000006423	1227.41	0.0285198	0.0471632	0.10618	0.674624	C330007P06Rik	None
ENSMUSG00000056553	5788.37	0.0284825	0.0437782	0.154426	0.758115	Ptprn2	None
ENSMUSG00000047909	849.525	0.028471	0.0491949	0.0746197	0.606423	Ankrd16	None
ENSMUSG00000025862	1575.27	0.0284487	0.0451391	0.13541	0.728129	Stag2	None
ENSMUSG00000020889	1693.81	0.0284186	0.0497578	0.0751924	0.606646	Nr1d1	None
ENSMUSG00000063894	712.282	0.0284145	0.0506451	0.0552759	0.558587	Zkscan8	None
ENSMUSG00000038602	1317.02	0.028409	0.053343	0.0166791	0.350419	Slc35f1	None
ENSMUSG00000029119	757.527	0.0284048	0.0490941	0.0828242	0.622108	Man2b2	None
ENSMUSG00000095253	636.356	0.0283589	0.050467	0.0671503	0.589402	Zfp799	None
ENSMUSG00000022983	1168.87	0.0283388	0.0471866	0.108854	0.679118	Scaf4	None
ENSMUSG00000039419	2958.91	0.0282278	0.0490134	0.0602903	0.570708	Cntnap2	None
ENSMUSG00000027007	1545.19	0.0282257	0.0486863	0.0858301	0.628683	Itprid2	None
ENSMUSG00000037270	2866.28	0.0282027	0.0415803	0.130175	0.719455	4932438A13Rik	None
ENSMUSG00000029767	2042.86	0.0280836	0.0450256	0.113994	0.688749	Calu	None
ENSMUSG00000049470	5873.99	0.0280219	0.0438073	0.141878	0.741442	Aff4	None
ENSMUSG00000005774	667.677	0.0280141	0.0499424	0.0647349	0.584446	Rfx5	None
ENSMUSG00000039474	3115.7	0.0280128	0.0482935	0.0946018	0.652484	Wfs1	None
ENSMUSG00000045594	566.106	0.0280027	0.0512022	0.0382727	0.480042	Glb1	None
ENSMUSG00000021302	1327.55	0.027912	0.0464469	0.110198	0.682473	Ggps1	None
ENSMUSG00000027425	716.627	0.0278493	0.0489619	0.0796966	0.616189	Kat14	None
ENSMUSG00000031333	843.387	0.0277922	0.0481746	0.0924623	0.648327	Abcb7	None
ENSMUSG00000049672	632.382	0.027773	0.0501172	0.0588705	0.567001	Zbtb14	None
ENSMUSG00000044393	201.52	0.0277588	0.053609	0.00610822	0.2314	Dsg2	None
ENSMUSG00000057229	791.968	0.0277399	0.0489978	0.0722177	0.603501	Dmac2	None
ENSMUSG00000028906	845.172	0.0277099	0.0497107	0.0633833	0.579781	Epb41	None
ENSMUSG00000021193	822.644	0.0276767	0.0494686	0.0751163	0.606646	Pitrm1	None
ENSMUSG00000061838	440.41	0.0276339	0.0507716	0.0447532	0.508443	Suclg2	None
ENSMUSG00000031785	1575.03	0.027623	0.0455717	0.134276	0.726103	Adgrg1	None
ENSMUSG00000024268	9446.21	0.027588	0.0433384	0.174558	0.78907	Celf4	None
ENSMUSG00000059857	957.186	0.0275609	0.0499282	0.057584	0.565195	Ntng1	None
ENSMUSG00000012422	1139.24	0.0274757	0.0450899	0.137033	0.730164	Tmem167	None
ENSMUSG00000063049	512.586	0.0273679	0.0503973	0.0482278	0.528848	Ing2	None
ENSMUSG00000041548	453.511	0.0273558	0.0500932	0.0509889	0.540111	Hspb8	None
ENSMUSG00000020255	1030.43	0.0273412	0.0460171	0.124031	0.709812	D10Wsu102e	None
ENSMUSG00000009575	4936.88	0.0273325	0.0421216	0.203233	0.813869	Cbx5	None
ENSMUSG00000027709	795.99	0.0273233	0.0491897	0.0684278	0.592271	Mccc1	None
ENSMUSG00000042724	615.387	0.0273092	0.0504547	0.0454099	0.510793	Map3k9	None
ENSMUSG00000019578	1772.67	0.0272989	0.0473584	0.104784	0.672529	Ubxn6	None
ENSMUSG00000040473	612.777	0.0272846	0.051881	0.0200051	0.372217	Cfap69	None
ENSMUSG00000000420	1168.63	0.0272786	0.0447995	0.140015	0.735023	Galnt1	None
ENSMUSG00000039202	3330.54	0.027143	0.0514099	0.02883	0.432021	Abhd2	None
ENSMUSG00000028797	1370.56	0.0270646	0.0442256	0.145695	0.745714	Tmem234	None
ENSMUSG00000025555	1437.59	0.0270153	0.0469597	0.1082	0.678467	Farp1	None
ENSMUSG00000036306	1286.92	0.0270142	0.0496549	0.0592048	0.567001	Lzts1	None
ENSMUSG00000008153	7719.67	0.0269843	0.0443023	0.150679	0.751212	Clstn3	None
ENSMUSG00000007097	24863.8	0.0269751	0.038442	0.196487	0.807579	Atp1a2	None
ENSMUSG00000065954	3264.38	0.0269148	0.0411414	0.17739	0.79129	Tacc1	None
ENSMUSG00000038172	1199.53	0.0268926	0.0464413	0.112514	0.686846	Ttc39b	None
ENSMUSG00000030077	5732.64	0.0268855	0.0436489	0.119429	0.699109	Chl1	None
ENSMUSG00000015889	674.876	0.026881	0.0482371	0.0835099	0.622882	Lta4h	None
ENSMUSG00000040785	19475.1	0.0268419	0.0360262	0.208851	0.817263	Ttc3	None
ENSMUSG00000050272	1795.35	0.0267774	0.0425885	0.16724	0.777757	Dscam	None
ENSMUSG00000000794	737.806	0.0267687	0.0479349	0.0915608	0.644671	Kcnn3	None
ENSMUSG00000036760	3544.25	0.0267672	0.0415901	0.179889	0.79315	Kcnk9	None
ENSMUSG00000026399	249.023	0.0267515	0.0521103	0.0091303	0.266019	Cd55	None
ENSMUSG00000046351	822.826	0.0266551	0.0469348	0.106571	0.676449	Zfp322a	None
ENSMUSG00000004626	1152.18	0.0266196	0.0493733	0.0707191	0.598413	Stxbp2	None
ENSMUSG00000033075	437.362	0.0264831	0.0500775	0.0386075	0.482391	Senp1	None
ENSMUSG00000044365	658.723	0.0264721	0.0508234	0.0258969	0.411617	Cxxc4	None
ENSMUSG00000027455	1877.59	0.0264511	0.043791	0.157455	0.760657	Nsfl1c	None
ENSMUSG00000055447	2928.74	0.02635	0.0408848	0.20373	0.813869	Cd47	None
ENSMUSG00000073643	1202.2	0.0263491	0.0444282	0.144078	0.743436	Wdfy1	None
ENSMUSG00000006464	1317.08	0.0263213	0.0455791	0.129181	0.717418	Bbs1	None
ENSMUSG00000026604	684.512	0.026274	0.0495908	0.0448194	0.508443	Ptpn14	None
ENSMUSG00000026452	535.234	0.0262329	0.0502674	0.0301805	0.440623	Syt2	None
ENSMUSG00000010064	1914.54	0.0261449	0.0483132	0.0728784	0.60417	Slc38a3	None
ENSMUSG00000017760	2234.49	0.0261349	0.0427521	0.178171	0.791431	Ctsa	None
ENSMUSG00000024423	4627.67	0.0261155	0.0461744	0.186377	0.799143	Impact	None
ENSMUSG00000022321	833.128	0.0260971	0.0460794	0.116124	0.694618	Cdh10	None
ENSMUSG00000030691	939.825	0.0260805	0.0460364	0.116787	0.697019	Fchsd2	None
ENSMUSG00000024290	898.52	0.0260575	0.0486877	0.0631323	0.579781	Rock1	None
ENSMUSG00000015597	1619.55	0.0260408	0.0445761	0.13964	0.735023	Zfp318	None
ENSMUSG00000102748	335.833	0.0259767	0.0493654	0.0447907	0.508443	Pcdhgb2	None
ENSMUSG00000022995	4489.64	0.0259431	0.041404	0.193752	0.80537	Enah	None
ENSMUSG00000020836	661.923	0.0259257	0.04982	0.0337453	0.461775	Coro6	None
ENSMUSG00000005973	419.123	0.0259136	0.049347	0.0434316	0.507285	Rcn1	None
ENSMUSG00000032788	3146.01	0.0259094	0.0394394	0.19674	0.807579	Pdxk	None
ENSMUSG00000044452	728.46	0.0259028	0.0464499	0.107013	0.676942	Zfp507	None
ENSMUSG00000056211	6223.93	0.0258571	0.0412697	0.18433	0.795659	R3hdm1	None
ENSMUSG00000030279	2031.98	0.0258214	0.0442671	0.319264	0.888453	C2cd5	None
ENSMUSG00000074637	910.49	0.0258107	0.0467893	0.100057	0.662085	Sox2	None
ENSMUSG00000028809	4551.81	0.0257969	0.0413117	0.195631	0.806317	Srrm1	None
ENSMUSG00000037652	1965.24	0.0257538	0.0444454	0.139946	0.735023	Phc3	None
ENSMUSG00000038174	2566.66	0.0257211	0.041559	0.179349	0.792384	Fam126b	None
ENSMUSG00000028842	1780.6	0.0257044	0.0437568	0.147154	0.74623	Ago3	None
ENSMUSG00000036902	1041.73	0.0257011	0.0448421	0.110835	0.683039	Neto2	None
ENSMUSG00000020561	312.891	0.0256657	0.0495299	0.0349724	0.467582	Twistnb	None
ENSMUSG00000021427	3042.05	0.0256435	0.0422108	0.144014	0.743436	Ssr1	None
ENSMUSG00000062184	730.504	0.025636	0.0505488	0.0130119	0.315351	Hs6st2	None
ENSMUSG00000041132	765.024	0.0256139	0.0486709	0.0534584	0.551332	N4bp2l1	None
ENSMUSG00000028700	1622.2	0.0255799	0.0455982	0.124239	0.709812	Pomgnt1	None
ENSMUSG00000057672	1420.17	0.0255597	0.0443959	0.143918	0.743436	Pkn1	None
ENSMUSG00000020000	219.894	0.0255132	0.0508943	0.00709696	0.240524	Moxd1	None
ENSMUSG00000022255	2740.73	0.0254885	0.045465	0.128766	0.717418	Mtdh	None
ENSMUSG00000036036	285.285	0.0254867	0.0503902	0.0139941	0.325813	Zfp57	None
ENSMUSG00000026077	604.137	0.0254714	0.050769	0.00811957	0.249343	Npas2	None
ENSMUSG00000025351	1265.88	0.0254262	0.0469271	0.092048	0.646369	Cd63	None
ENSMUSG00000031360	777.989	0.0253929	0.048151	0.0630073	0.579781	Ctps2	None
ENSMUSG00000020423	496.727	0.0253898	0.0490111	0.0412214	0.496065	Btg2	None
ENSMUSG00000025892	1618.93	0.0253784	0.0494814	0.0299139	0.437734	Gria4	None
ENSMUSG00000030495	861.048	0.0253174	0.0484803	0.0547342	0.556277	Slc7a10	None
ENSMUSG00000037400	2798.29	0.0253094	0.0434004	0.108358	0.678571	Atp11b	None
ENSMUSG00000035376	823.212	0.0252249	0.0454873	0.121863	0.705115	Hacd2	None
ENSMUSG00000055022	8616.97	0.0251837	0.0399767	0.202061	0.813344	Cntn1	None
ENSMUSG00000039607	523.695	0.0251746	0.048117	0.0593746	0.567787	Rbms3	None
ENSMUSG00000032740	1867.62	0.0251657	0.0459895	0.113758	0.687796	Ccdc88a	None
ENSMUSG00000040659	3151.42	0.0251355	0.0456794	0.118577	0.697494	Efhd2	None
ENSMUSG00000026933	2606.56	0.0251354	0.0430843	0.169091	0.780817	Camsap1	None
ENSMUSG00000036192	429.097	0.025129	0.0484476	0.0484729	0.530646	Rorb	None
ENSMUSG00000025995	600.779	0.0251173	0.0474748	0.0724736	0.603501	Wdr75	None
ENSMUSG00000057329	345.864	0.0250837	0.0487245	0.0423038	0.503565	Bcl2	None
ENSMUSG00000028248	8153.91	0.0250542	0.0399967	0.211842	0.819431	Pnisr	None
ENSMUSG00000022789	5619.02	0.0250221	0.0385173	0.23825	0.844342	Dnm1l	None
ENSMUSG00000030235	1876.34	0.0250144	0.0492535	0.0204362	0.37403	Slco1c1	None
ENSMUSG00000021109	1795.35	0.0249803	0.0418265	0.185349	0.796037	Hif1a	None
ENSMUSG00000028277	2151.74	0.024955	0.0409621	0.207034	0.815921	Ube2j1	None
ENSMUSG00000040855	4881.81	0.0249444	0.0387986	0.232873	0.839934	Reps2	None
ENSMUSG00000040389	3113.58	0.0249421	0.0423772	0.174926	0.789643	Wdr47	None
ENSMUSG00000039704	2175.4	0.02494	0.0406654	0.19672	0.807579	Lmbrd2	None
ENSMUSG00000024378	468.476	0.0249311	0.0475458	0.0632984	0.579781	Stard4	None
ENSMUSG00000021072	930.796	0.0249102	0.0446313	0.138696	0.732214	Tmx1	None
ENSMUSG00000034616	1568.04	0.0248238	0.0463342	0.097455	0.655891	Ssh3	None
ENSMUSG00000028383	749.822	0.0247946	0.0450628	0.125907	0.712114	Hsdl2	None
ENSMUSG00000062380	5396.49	0.0247543	0.0442615	0.149595	0.748661	Tubb3	None
ENSMUSG00000039431	1076.49	0.0247233	0.0462384	0.10529	0.672557	Mtmr7	None
ENSMUSG00000023074	257.741	0.0247054	0.0489425	0.0292215	0.432427	Mospd1	None
ENSMUSG00000020156	1053.05	0.0247012	0.0448611	0.131369	0.721787	Pwwp3a	None
ENSMUSG00000021190	2159	0.0246891	0.0415167	0.190036	0.802288	Lgmn	None
ENSMUSG00000023809	1375.11	0.0246652	0.0443095	0.142481	0.741981	Rps6ka2	None
ENSMUSG00000050556	4094.73	0.0246543	0.0428546	0.169467	0.780897	Kcnb1	None
ENSMUSG00000025478	1346.47	0.0246401	0.0442313	0.143798	0.743436	Dpysl4	None
ENSMUSG00000028524	3631.56	0.0246361	0.0420764	0.173065	0.785306	Sgip1	None
ENSMUSG00000025437	3053.67	0.0246218	0.0450371	0.133436	0.724887	Usp33	None
ENSMUSG00000024563	707.166	0.0245314	0.0472508	0.0697951	0.597161	Smad2	None
ENSMUSG00000018846	1665.7	0.0245277	0.0423466	0.177217	0.79129	Pank3	None
ENSMUSG00000041685	1224.19	0.0244872	0.0452342	0.122417	0.707357	Fcho2	None
ENSMUSG00000091264	4547.18	0.0244854	0.0385448	0.238625	0.844615	Smim13	None
ENSMUSG00000022299	449.018	0.0244241	0.0474234	0.0543746	0.554595	Slc25a32	None
ENSMUSG00000047496	263.164	0.0244055	0.0493393	0.0139657	0.325813	Rnf152	None
ENSMUSG00000026987	936.615	0.0243838	0.0476287	0.0566416	0.563537	Baz2b	None
ENSMUSG00000030246	6761.52	0.0243464	0.0387669	0.202046	0.813344	Ldhb	None
ENSMUSG00000072966	3351.97	0.0243251	0.045001	0.199685	0.811145	Gprasp2	None
ENSMUSG00000020894	22366.1	0.0243039	0.0405423	0.222342	0.827486	Vamp2	None
ENSMUSG00000055733	1006.8	0.0242895	0.0457822	0.103693	0.669874	Nap1l3	None
ENSMUSG00000040936	206.322	0.0242865	0.049245	0.013527	0.321161	Ulk4	None
ENSMUSG00000049804	1966.71	0.0242516	0.0435895	0.154437	0.758115	Armcx4	None
ENSMUSG00000046613	984.768	0.0242315	0.0474618	0.0620436	0.576459	Vwa5b2	None
ENSMUSG00000030536	963.236	0.0242181	0.0478008	0.0514539	0.542402	Iqgap1	None
ENSMUSG00000064293	416.67	0.0242179	0.0486339	0.0252306	0.405488	Cntn4	None
ENSMUSG00000050989	510.669	0.0241985	0.0469249	0.0731164	0.60417	Selenon	None
ENSMUSG00000021474	1128.53	0.0241763	0.0449375	0.125502	0.712039	Sfxn1	None
ENSMUSG00000051351	1072.52	0.0241162	0.0435348	0.157935	0.760797	Zfp46	None
ENSMUSG00000033918	490.396	0.024108	0.0481276	0.0367209	0.472237	Parl	None
ENSMUSG00000041891	994.65	0.0240965	0.0471709	0.0631717	0.579781	Lman1	None
ENSMUSG00000046352	231.766	0.0240941	0.0493652	0.0084317	0.253221	Gjb2	None
ENSMUSG00000078652	2415.5	0.0240917	0.0425208	0.177366	0.79129	Psme3	None
ENSMUSG00000019947	858.372	0.0240828	0.0458021	0.10917	0.679358	Arid5b	None
ENSMUSG00000005683	5781.37	0.0240815	0.0368564	0.251421	0.852319	Cs	None
ENSMUSG00000025915	406.937	0.0240695	0.0472758	0.0585821	0.565195	Sgk3	None
ENSMUSG00000089809	304.712	0.0240009	0.0487642	0.0186121	0.363409	Rasgef1b	None
ENSMUSG00000031878	996.271	0.0239628	0.0445571	0.139186	0.734505	Nae1	None
ENSMUSG00000021219	343.743	0.0239616	0.0485642	0.0221073	0.387159	Rgs6	None
ENSMUSG00000028484	4697.59	0.0239401	0.0407175	0.211934	0.819545	Psip1	None
ENSMUSG00000036275	2034.82	0.0239248	0.0423131	0.179635	0.792843	9530068E07Rik	None
ENSMUSG00000029781	1172.16	0.0238899	0.0462536	0.0882663	0.635044	Fkbp9	None
ENSMUSG00000089774	974.108	0.0238321	0.0447731	0.129711	0.718204	Slc5a3	None
ENSMUSG00000038305	444.622	0.0238319	0.0469603	0.0563489	0.563113	Spats2l	None
ENSMUSG00000038806	497.232	0.0238314	0.0464982	0.0774525	0.609187	Sde2	None
ENSMUSG00000014349	2223.88	0.0238221	0.0402325	0.21932	0.826596	Ube2z	None
ENSMUSG00000033799	948.216	0.0238132	0.0463712	0.0930085	0.648926	Tasor2	None
ENSMUSG00000006262	875.644	0.0238014	0.0467038	0.0751466	0.606646	Mob1b	None
ENSMUSG00000007656	1770.06	0.0237683	0.0430182	0.146792	0.746076	Arpp19	None
ENSMUSG00000027270	776.581	0.0237506	0.0461904	0.0927566	0.648857	Lamp5	None
ENSMUSG00000021693	2053.08	0.0237075	0.0414645	0.189483	0.802288	Kif2a	None
ENSMUSG00000036437	644.553	0.0236977	0.0450043	0.11944	0.699109	Npy1r	None
ENSMUSG00000018199	1468.66	0.0236931	0.0430624	0.150476	0.75081	Ro60	None
ENSMUSG00000034647	1903.09	0.0236741	0.042709	0.166728	0.776758	Ankrd12	None
ENSMUSG00000022066	634.79	0.0236498	0.0480598	0.0281502	0.426228	Entpd4b	None
ENSMUSG00000032468	1664.75	0.0236229	0.0406612	0.195797	0.806747	Armc8	None
ENSMUSG00000027365	1570.06	0.023621	0.0449336	0.136612	0.729677	Trpm7	None
ENSMUSG00000021392	627.97	0.0235663	0.0451564	0.113478	0.687556	Nol8	None
ENSMUSG00000042508	1678.78	0.0235188	0.0422747	0.183766	0.795544	Dmtf1	None
ENSMUSG00000019188	1607.36	0.0235035	0.041285	0.207284	0.816526	H13	None
ENSMUSG00000024261	3531.87	0.0234315	0.0432173	0.168731	0.780182	Syt4	None
ENSMUSG00000057530	924.413	0.0233951	0.0482775	0.0168131	0.350419	Ece1	None
ENSMUSG00000030380	395.035	0.0233884	0.0469294	0.0581703	0.565195	Mzf1	None
ENSMUSG00000058006	1722.23	0.0233829	0.0455866	0.0974661	0.655891	Mdn1	None
ENSMUSG00000039089	563.998	0.0233785	0.0464487	0.0696556	0.59674	L3mbtl3	None
ENSMUSG00000015961	1801.56	0.0233297	0.0413107	0.204766	0.813964	Adss	None
ENSMUSG00000020720	1298.26	0.023319	0.0433296	0.156999	0.76018	Psmd12	None
ENSMUSG00000025326	2747.56	0.0232814	0.0385228	0.236446	0.843609	Ube3a	None
ENSMUSG00000053199	1631	0.0232776	0.0421816	0.181834	0.793474	Arhgap20	None
ENSMUSG00000004508	570.432	0.0232646	0.0452795	0.105372	0.672759	Gab2	None
ENSMUSG00000000948	202.463	0.0232607	0.0484952	0.00936465	0.26773	Gm38393	None
ENSMUSG00000028790	2234.64	0.0232271	0.0400547	0.212781	0.819633	Khdrbs1	None
ENSMUSG00000029455	2174.72	0.0232128	0.0433565	0.160381	0.764181	Aldh2	None
ENSMUSG00000024943	793.315	0.0231907	0.0443298	0.131933	0.722458	Smc5	None
ENSMUSG00000031601	2179.28	0.0231805	0.0409008	0.212774	0.819633	Cnot7	None
ENSMUSG00000045284	1114.58	0.023125	0.044026	0.147936	0.74623	Dcaf12l1	None
ENSMUSG00000118504	298.741	0.0231106	0.047586	0.0238516	0.394971	AC163616.1	None
ENSMUSG00000038965	3290.54	0.0231093	0.0388291	0.238765	0.844653	Ube2l3	None
ENSMUSG00000033453	157.686	0.0230599	0.0483311	0.00942383	0.268589	Adamts15	None
ENSMUSG00000060429	239.06	0.0230475	0.0484719	0.006233	0.2314	Sntb1	None
ENSMUSG00000021548	991.995	0.0230378	0.0446078	0.131693	0.722051	Ccnh	None
ENSMUSG00000052406	1176.46	0.0230041	0.0434506	0.158649	0.761011	Rexo4	None
ENSMUSG00000040972	619.796	0.0229896	0.0468515	0.0495713	0.534987	Igsf21	None
ENSMUSG00000033671	1556.12	0.0229818	0.0418564	0.225707	0.832686	Cep350	None
ENSMUSG00000068876	237.047	0.0229637	0.048334	0.00718739	0.242334	Cgn	None
ENSMUSG00000042104	831.798	0.0229598	0.0453254	0.0923348	0.648028	Uggt2	None
ENSMUSG00000024976	1200.85	0.0229455	0.0433128	0.156633	0.76018	Shoc2	None
ENSMUSG00000055371	607.481	0.0229417	0.0454004	0.0989933	0.659048	Stam2	None
ENSMUSG00000059742	1031.8	0.0229382	0.0461368	0.0707165	0.598413	Kcnh7	None
ENSMUSG00000033658	889.918	0.0228628	0.0441644	0.143042	0.741981	Ddx19b	None
ENSMUSG00000004961	2643.75	0.0228209	0.0450897	0.101997	0.665676	Syt5	None
ENSMUSG00000001542	539.684	0.0228186	0.0462979	0.0632148	0.579781	Ell2	None
ENSMUSG00000048445	249.485	0.0228134	0.0473384	0.0290246	0.432427	Ccdc57	None
ENSMUSG00000052914	437.269	0.0227998	0.0454681	0.0946663	0.652489	Cyp2j6	None
ENSMUSG00000043881	1215.52	0.0227877	0.0421328	0.181857	0.793474	Kbtbd7	None
ENSMUSG00000033917	3608.12	0.0227802	0.0382923	0.229623	0.836566	Gde1	None
ENSMUSG00000021706	546.618	0.0227686	0.0457431	0.0826238	0.622108	Zfyve16	None
ENSMUSG00000032482	5368.35	0.022763	0.0415455	0.182265	0.793474	Cspg5	None
ENSMUSG00000027006	1629.84	0.0227533	0.0422375	0.179222	0.792086	Dnajc10	None
ENSMUSG00000027030	1908.33	0.0227204	0.0467303	0.0450057	0.508872	Stk39	None
ENSMUSG00000021666	751.666	0.0227125	0.0445187	0.122551	0.707595	Gfm2	None
ENSMUSG00000037966	336.426	0.0227054	0.04654	0.0532026	0.55063	Ninj1	None
ENSMUSG00000010307	338.279	0.0227018	0.0463947	0.0607887	0.572673	Tmem86a	None
ENSMUSG00000019923	14815	0.0226976	0.0442629	0.128801	0.717418	Zwint	None
ENSMUSG00000025265	406.185	0.0226969	0.045908	0.0752143	0.606646	Fgd1	None
ENSMUSG00000003617	515.158	0.0226721	0.0461624	0.0651844	0.586023	Cp	None
ENSMUSG00000028194	1924.59	0.022653	0.0409845	0.1938	0.80537	Ddah1	None
ENSMUSG00000027366	1302.25	0.0226395	0.0416474	0.193334	0.80537	Sppl2a	None
ENSMUSG00000031451	2632.23	0.0226308	0.0451404	0.0592523	0.567037	Gas6	None
ENSMUSG00000046402	378.879	0.0226229	0.0464699	0.0542567	0.554595	Rbp1	None
ENSMUSG00000038984	939.106	0.0226225	0.0444821	0.120435	0.70242	Tspyl5	None
ENSMUSG00000029238	2423.56	0.0226211	0.0397421	0.23852	0.84447	Clock	None
ENSMUSG00000059361	1335.13	0.0226067	0.0441713	0.168144	0.779747	Nrsn2	None
ENSMUSG00000031295	841.673	0.0225543	0.043432	0.154119	0.758115	Phka2	None
ENSMUSG00000028020	3552.9	0.0225036	0.0380521	0.256934	0.854186	Glrb	None
ENSMUSG00000037239	1638.89	0.0224984	0.041386	0.207876	0.817263	Spred3	None
ENSMUSG00000051726	1669.4	0.0224983	0.0458442	0.0723226	0.603501	Kcnf1	None
ENSMUSG00000078886	499.539	0.022462	0.0472261	0.0183861	0.36131	Gm2026	None
ENSMUSG00000047155	331.99	0.0224271	0.0459448	0.0671618	0.589402	Cyp4x1	None
ENSMUSG00000009535	1375.03	0.022401	0.0429984	0.162912	0.768679	Rnmt	None
ENSMUSG00000052539	1207.06	0.0223987	0.042015	0.189147	0.802288	Magi3	None
ENSMUSG00000005873	7751.38	0.0223862	0.0347995	0.287585	0.871918	Reep5	None
ENSMUSG00000037287	1673.01	0.0223756	0.0426862	0.171487	0.783034	Tbcel	None
ENSMUSG00000055128	294.566	0.0223703	0.046969	0.0297237	0.436725	Cgrrf1	None
ENSMUSG00000032307	1567.61	0.0223524	0.0407077	0.215294	0.822276	Ube2q2	None
ENSMUSG00000038587	595.869	0.0223316	0.0452991	0.0986568	0.658297	Akap12	None
ENSMUSG00000025980	3396.01	0.0223278	0.0397703	0.239292	0.844653	Hspd1	None
ENSMUSG00000040147	595.992	0.0223025	0.0457268	0.0770093	0.609187	Maob	None
ENSMUSG00000030180	1234.09	0.0222741	0.0426966	0.17422	0.788089	Kdm5a	None
ENSMUSG00000057335	2002.4	0.0222702	0.042982	0.156206	0.76018	Cep170	None
ENSMUSG00000040760	2464.32	0.0222526	0.0393795	0.230696	0.837524	Appl1	None
ENSMUSG00000051951	648.686	0.022251	0.0450289	0.0969133	0.655242	Xkr4	None
ENSMUSG00000022763	2307.67	0.0222418	0.0393696	0.243019	0.845596	Aifm3	None
ENSMUSG00000035357	291.185	0.022235	0.0471738	0.0196555	0.367858	Pdzrn3	None
ENSMUSG00000062901	2073.79	0.0222053	0.0423532	0.175952	0.791042	Klhl24	None
ENSMUSG00000039967	1120.91	0.0221767	0.0422983	0.181457	0.793474	Zfp292	None
ENSMUSG00000020546	611.702	0.0221758	0.0452936	0.0869546	0.633201	Stxbp4	None
ENSMUSG00000021262	1956.08	0.0221393	0.0443213	0.11152	0.684985	Evl	None
ENSMUSG00000022521	1923.7	0.0221174	0.0407452	0.212562	0.819633	Crebbp	None
ENSMUSG00000022788	1119.59	0.0221033	0.0417915	0.181256	0.793474	Fgd4	None
ENSMUSG00000057551	631.216	0.0220718	0.0451199	0.0888578	0.636159	Zfp317	None
ENSMUSG00000074513	466.428	0.0220266	0.045366	0.0763422	0.609187	Arfip1	None
ENSMUSG00000098188	490.125	0.0219943	0.0472613	0.012126	0.304477	Sowahc	None
ENSMUSG00000029661	517.107	0.0219701	0.0448938	0.0976307	0.655986	Col1a2	None
ENSMUSG00000034602	2402.86	0.0219371	0.0416868	0.27215	0.862885	Mon2	None
ENSMUSG00000027823	1648.64	0.021937	0.0404941	0.214946	0.821987	Gmps	None
ENSMUSG00000026554	3977.77	0.0218889	0.0369478	0.259067	0.854223	Dcaf8	None
ENSMUSG00000006373	6088.18	0.0218738	0.0434133	0.141879	0.741442	Pgrmc1	None
ENSMUSG00000002617	601.503	0.0218576	0.0452273	0.0734144	0.60417	Zfp40	None
ENSMUSG00000036256	409.677	0.0218556	0.0461225	0.04659	0.519158	Igfbp7	None
ENSMUSG00000021918	590.887	0.0218552	0.0443768	0.105234	0.672529	Nek4	None
ENSMUSG00000027865	686.942	0.0218229	0.0430929	0.162039	0.767508	Gdap2	None
ENSMUSG00000033400	1072.25	0.0217767	0.0443241	0.11742	0.69711	Agl	None
ENSMUSG00000039953	21473.3	0.0217752	0.0364357	0.261375	0.85577	Clstn1	None
ENSMUSG00000034007	815.002	0.0216413	0.0423215	0.176884	0.79129	Scaper	None
ENSMUSG00000027829	1231.71	0.0216169	0.0429055	0.158763	0.761011	Ccnl1	None
ENSMUSG00000020953	264.37	0.0216153	0.0467181	0.0172561	0.354267	Coch	None
ENSMUSG00000034525	3895.87	0.0216124	0.0364104	0.250812	0.852043	Ice1	None
ENSMUSG00000055540	880.913	0.0216089	0.0439476	0.136831	0.730164	Epha6	None
ENSMUSG00000031715	1684.47	0.0215822	0.0410556	0.21622	0.823598	Smarca5	None
ENSMUSG00000035173	1159.09	0.0215515	0.0419677	0.191757	0.804076	Ccdc186	None
ENSMUSG00000033900	2595.72	0.0215469	0.0391317	0.183825	0.795544	Map9	None
ENSMUSG00000026141	546.676	0.0215373	0.0448705	0.0912138	0.643266	Col19a1	None
ENSMUSG00000041708	5084.65	0.0215347	0.0438033	0.116738	0.697019	Mpped1	None
ENSMUSG00000025245	1375.77	0.0215217	0.0451045	0.0769582	0.609187	Lztfl1	None
ENSMUSG00000022307	5957.87	0.0215178	0.0429748	0.059681	0.567787	Oxr1	None
ENSMUSG00000059811	1416.97	0.0214898	0.0410272	0.206245	0.815828	Atl2	None
ENSMUSG00000016534	2042.26	0.0214752	0.0449512	0.090956	0.643263	Lamp2	None
ENSMUSG00000037940	226.391	0.0214697	0.0460896	0.0370305	0.473542	Inpp4b	None
ENSMUSG00000044783	1624.31	0.0214063	0.03937	0.234537	0.840607	Hjurp	None
ENSMUSG00000048424	230.415	0.0214033	0.046078	0.0355487	0.469626	Ranbp3l	None
ENSMUSG00000019861	1292.52	0.0213876	0.0407736	0.501027	0.940108	Gopc	None
ENSMUSG00000029141	636.019	0.0213793	0.0448392	0.0847659	0.625794	Slc4a1ap	None
ENSMUSG00000056004	529.357	0.0213609	0.0446851	0.0928897	0.648857	9330182L06Rik	None
ENSMUSG00000015766	974.666	0.0213515	0.042567	0.168778	0.780182	Eps8	None
ENSMUSG00000026864	5897.67	0.0212763	0.0415352	0.234095	0.840607	Hspa5	None
ENSMUSG00000050332	272.837	0.0212636	0.0460247	0.0335108	0.459803	Amer1	None
ENSMUSG00000003411	1029.26	0.0212411	0.0457458	0.0443593	0.507285	Rab3b	None
ENSMUSG00000026775	2095.58	0.0212257	0.0393182	0.248068	0.849492	Yme1l1	None
ENSMUSG00000021257	219.083	0.0212201	0.0460589	0.0306702	0.441394	Angel1	None
ENSMUSG00000057894	892.049	0.0211925	0.0447492	0.0845252	0.62437	Zfp329	None
ENSMUSG00000039716	4196.09	0.0211729	0.0377822	0.252212	0.852461	Dock3	None
ENSMUSG00000002799	989.771	0.0211702	0.0430445	0.153334	0.756777	Jag2	None
ENSMUSG00000019763	673.382	0.021156	0.0449855	0.0802986	0.616701	Rmnd1	None
ENSMUSG00000008763	2712.24	0.0211465	0.0394435	0.246755	0.848904	Man1a2	None
ENSMUSG00000028354	1783.1	0.0211422	0.039113	0.246809	0.848904	Fmn2	None
ENSMUSG00000024594	622.054	0.02112	0.0434918	0.134819	0.726756	Prrc1	None
ENSMUSG00000056216	824.935	0.0211191	0.0428966	0.155391	0.758799	Cebpg	None
ENSMUSG00000029309	34040.3	0.0211095	0.0394873	0.254745	0.853689	Sparcl1	None
ENSMUSG00000054199	2299.69	0.0211091	0.0385071	0.257321	0.854186	Gon4l	None
ENSMUSG00000066189	1173.92	0.0210848	0.0427555	0.166458	0.776417	Cacng3	None
ENSMUSG00000022672	973.05	0.0210757	0.0417323	0.18832	0.802255	Prkdc	None
ENSMUSG00000024454	2279.42	0.0210543	0.039255	0.240044	0.845292	Hdac3	None
ENSMUSG00000034848	386.496	0.0210516	0.0448023	0.0821293	0.622108	Ttc21b	None
ENSMUSG00000003458	1404.63	0.0210304	0.0406024	0.224167	0.829809	Ncstn	None
ENSMUSG00000048379	424.499	0.0209737	0.0442546	0.102572	0.668147	Socs4	None
ENSMUSG00000051306	634.158	0.0209402	0.0435708	0.129313	0.717418	Usp42	None
ENSMUSG00000051343	1707.7	0.0209341	0.0392848	0.249365	0.850326	Rab11fip5	None
ENSMUSG00000063810	318.951	0.020916	0.0453169	0.0534376	0.551332	Alms1	None
ENSMUSG00000041846	1279.23	0.0209156	0.0408005	0.2268	0.833047	Ppp4r3a	None
ENSMUSG00000035798	2645.79	0.020892	0.0380974	0.264804	0.858955	Zdhhc17	None
ENSMUSG00000006307	1970.56	0.0208468	0.0434425	0.138023	0.731801	Kmt2b	None
ENSMUSG00000025962	436.011	0.0208455	0.0442516	0.0989489	0.659048	Fastkd2	None
ENSMUSG00000009905	784.428	0.0208431	0.0420129	0.182763	0.793502	Kdsr	None
ENSMUSG00000041483	1109.02	0.0208294	0.0411505	0.190272	0.802288	Zfp281	None
ENSMUSG00000045098	1474.6	0.0208237	0.041517	0.197527	0.80859	Kmt5b	None
ENSMUSG00000029992	1723.87	0.0207967	0.0396088	0.249534	0.850326	Gfpt1	None
ENSMUSG00000042942	355.894	0.0207912	0.0448925	0.0704206	0.598413	Greb1l	None
ENSMUSG00000069049	1258.68	0.0207709	0.0442389	0.0981482	0.656542	Eif2s3y	None
ENSMUSG00000020181	1925.9	0.0207528	0.0433225	0.137523	0.73133	Nav3	None
ENSMUSG00000046572	420.735	0.0207495	0.0445889	0.0817764	0.622108	Zfp518b	None
ENSMUSG00000036800	2031.7	0.0206682	0.0447142	0.0762844	0.609187	Fam135b	None
ENSMUSG00000020205	356.969	0.0206629	0.0446349	0.0734659	0.60417	Phlda1	None
ENSMUSG00000011179	1399.28	0.0206617	0.0414426	0.200759	0.812855	Odc1	None
ENSMUSG00000043015	168.894	0.0206344	0.0459469	0.0181486	0.361305	Nemp2	None
ENSMUSG00000006699	5795.68	0.0206227	0.0378905	0.281209	0.869435	Cdc42	None
ENSMUSG00000042595	345.772	0.0206118	0.044488	0.0869792	0.633201	Fam199x	None
ENSMUSG00000073987	372.404	0.0206056	0.0455974	0.0325661	0.455647	Ggh	None
ENSMUSG00000031529	3057.84	0.020594	0.0392527	0.243031	0.845596	Tnks	None
ENSMUSG00000054708	1065.74	0.0205917	0.0418554	0.187606	0.801653	Ankrd24	None
ENSMUSG00000030272	998.277	0.0205813	0.0430597	0.147025	0.746076	Camk1	None
ENSMUSG00000001521	554.025	0.0205799	0.0440567	0.104591	0.672529	Tulp3	None
ENSMUSG00000029267	1127.36	0.0205762	0.0417937	0.188686	0.802288	Mtf2	None
ENSMUSG00000025766	402.754	0.0205277	0.0439736	0.105043	0.672529	D3Ertd751e	None
ENSMUSG00000022971	413.117	0.0205097	0.0441783	0.0877533	0.634928	Ifnar2	None
ENSMUSG00000029875	364.555	0.0205083	0.0449455	0.0583734	0.565195	Ccdc184	None
ENSMUSG00000048040	1136.39	0.0204981	0.0433904	0.131039	0.721182	Arxes2	None
ENSMUSG00000038026	2853.3	0.0204913	0.0426771	0.106905	0.676925	Kcnj9	None
ENSMUSG00000013921	9830.58	0.020483	0.0397411	0.246131	0.848007	Clip3	None
ENSMUSG00000022037	17686.9	0.0204761	0.0366616	0.290644	0.874121	Clu	None
ENSMUSG00000029840	6278.58	0.0204062	0.0356537	0.289306	0.872653	Mtpn	None
ENSMUSG00000024712	1336.25	0.020403	0.040303	0.277986	0.867982	Rfk	None
ENSMUSG00000037455	536.267	0.0203616	0.0431985	0.135474	0.728129	Slc18b1	None
ENSMUSG00000034981	2353.36	0.0203569	0.043562	0.166341	0.776336	Parm1	None
ENSMUSG00000020790	1535.75	0.0203558	0.0399973	0.237285	0.843648	Ankfy1	None
ENSMUSG00000035126	389.063	0.0203532	0.045297	0.0360518	0.469932	Wdr78	None
ENSMUSG00000024097	2754.95	0.0203407	0.0394827	0.233266	0.840153	Srsf7	None
ENSMUSG00000040433	1302.57	0.0203389	0.0413297	0.199855	0.811145	Zbtb38	None
ENSMUSG00000017412	3103.78	0.0203293	0.0412159	0.177172	0.79129	Cacnb4	None
ENSMUSG00000078202	464.014	0.0202876	0.0440068	0.0991239	0.659135	Nrarp	None
ENSMUSG00000064329	2618.44	0.0202792	0.037894	0.274032	0.864101	Scn1a	None
ENSMUSG00000037410	373.79	0.0202548	0.0443406	0.0793091	0.614904	Tbc1d2b	None
ENSMUSG00000057614	3701.46	0.0202506	0.0400198	0.234513	0.840607	Gnai1	None
ENSMUSG00000033102	372.304	0.0202292	0.0455977	0.0207393	0.376299	Cdc14b	None
ENSMUSG00000052921	219.608	0.0202272	0.0450587	0.0442102	0.507285	Arhgef15	None
ENSMUSG00000027293	262.186	0.0202193	0.0451656	0.0377913	0.476287	Ehd4	None
ENSMUSG00000041966	419.153	0.0202178	0.0445465	0.0696156	0.59674	Dcaf17	None
ENSMUSG00000028132	1099.18	0.0201876	0.0404964	0.219107	0.826596	Tmem56	None
ENSMUSG00000030304	1109.78	0.0201837	0.0451041	0.0396494	0.491653	Ergic2	None
ENSMUSG00000054770	410.097	0.0201683	0.0438674	0.0967956	0.655242	Kctd18	None
ENSMUSG00000044117	4742.6	0.0201444	0.0387156	0.326329	0.891798	Bmerb1	None
ENSMUSG00000021470	617.966	0.0201334	0.0437547	0.106825	0.676925	Ercc6l2	None
ENSMUSG00000030688	372.329	0.0201322	0.0438394	0.101611	0.665652	Stard10	None
ENSMUSG00000028373	604.092	0.020128	0.0428776	0.148435	0.746609	Astn2	None
ENSMUSG00000004568	1417.95	0.020112	0.0404675	0.223358	0.829809	Arhgef18	None
ENSMUSG00000042272	1669.46	0.0201114	0.0392002	0.256914	0.854186	Sestd1	None
ENSMUSG00000030329	2739.29	0.020105	0.0377544	0.279091	0.867982	Pianp	None
ENSMUSG00000024909	248.052	0.0201041	0.0447111	0.0578471	0.565195	Efemp2	None
ENSMUSG00000025572	150.574	0.0200645	0.0454036	0.0229159	0.391366	Tmc6	None
ENSMUSG00000031352	454.861	0.0200378	0.0437811	0.100568	0.663029	Hccs	None
ENSMUSG00000074909	983.615	0.0200304	0.041476	0.207047	0.815921	Ranbp6	None
ENSMUSG00000008206	2089.58	0.0200219	0.040643	0.22229	0.827486	Cers4	None
ENSMUSG00000026797	13883.1	0.0200115	0.0343759	0.316667	0.887527	Stxbp1	None
ENSMUSG00000033902	1788.41	0.0200025	0.0399	0.216404	0.823598	Mapkbp1	None
ENSMUSG00000063297	2636.61	0.0199859	0.0397225	0.243363	0.845596	Luzp2	None
ENSMUSG00000033186	1674.95	0.0199567	0.0392362	0.245398	0.847379	Mzt1	None
ENSMUSG00000076441	581.713	0.0199475	0.0433482	0.121697	0.705115	Ass1	None
ENSMUSG00000024993	634.314	0.0199429	0.0435301	0.113491	0.687556	Fam45a	None
ENSMUSG00000025207	890.871	0.0199271	0.0435469	0.1116	0.685099	Sema4g	None
ENSMUSG00000062960	483.65	0.0199238	0.0437657	0.101833	0.665652	Kdr	None
ENSMUSG00000027810	992.571	0.0199147	0.0409074	0.219315	0.826596	Eif2a	None
ENSMUSG00000051855	484.14	0.0199092	0.0453184	0.021619	0.385227	Mest	None
ENSMUSG00000038084	3613.1	0.0199049	0.0369647	0.304461	0.885299	Opa1	None
ENSMUSG00000072704	2526.98	0.019904	0.0419376	0.179629	0.792843	Smim10l1	None
ENSMUSG00000007659	2063.95	0.0198975	0.0401421	0.206898	0.815921	Bcl2l1	None
ENSMUSG00000057363	1114.12	0.019888	0.0402572	0.23499	0.841665	Uxs1	None
ENSMUSG00000032328	9019	0.0198824	0.0365039	0.289201	0.87254	Tmem30a	None
ENSMUSG00000034269	3250.08	0.0198668	0.0381339	0.284083	0.869938	Setd5	None
ENSMUSG00000031292	3702.66	0.0198588	0.0379044	0.238398	0.844399	Cdkl5	None
ENSMUSG00000025860	2038.44	0.0198586	0.037955	0.286226	0.871167	Xiap	None
ENSMUSG00000025780	914.486	0.0198531	0.0420951	0.185006	0.795659	Itih5	None
ENSMUSG00000004460	1185.41	0.0198455	0.0407797	0.221606	0.827486	Dnajb11	None
ENSMUSG00000033499	1746.76	0.0198426	0.0402248	0.232774	0.839934	Larp4b	None
ENSMUSG00000030846	2811.86	0.019836	0.038553	0.27337	0.863616	Tial1	None
ENSMUSG00000066613	970.905	0.0197807	0.041401	0.196596	0.807579	Zfp932	None
ENSMUSG00000039167	350.506	0.0197745	0.0444065	0.0633239	0.579781	Adgrl4	None
ENSMUSG00000031428	6575.33	0.0197518	0.0400627	0.248955	0.850158	Zcchc18	None
ENSMUSG00000041577	1084.67	0.0197322	0.0439675	0.0862374	0.631314	Prelp	None
ENSMUSG00000027248	4141.47	0.0197285	0.0380968	0.213176	0.819966	Pdia3	None
ENSMUSG00000029775	3043.05	0.0196597	0.0373032	0.292166	0.875627	Klhdc10	None
ENSMUSG00000030894	2029.85	0.0196576	0.0418148	0.191309	0.80318	Tpp1	None
ENSMUSG00000000552	983.168	0.0196273	0.0403543	0.229989	0.836566	Zfp385a	None
ENSMUSG00000022770	2381.28	0.0196249	0.0408816	0.217516	0.824838	Dlg1	None
ENSMUSG00000047193	997.011	0.0196063	0.0412195	0.203486	0.813869	Dync2h1	None
ENSMUSG00000023942	421.124	0.0195916	0.0441192	0.0731802	0.60417	Slc29a1	None
ENSMUSG00000063558	302.526	0.0195862	0.0447649	0.0376601	0.47601	Aox1	None
ENSMUSG00000020620	980.37	0.0195618	0.0411294	0.219658	0.826883	Abca8b	None
ENSMUSG00000021242	1181.9	0.0195484	0.0417189	0.192021	0.804076	Npc2	None
ENSMUSG00000036667	7644.32	0.0195474	0.0356737	0.280396	0.868817	Tcaf1	None
ENSMUSG00000046093	20867.1	0.0195305	0.0363942	0.271358	0.862675	Hpcal4	None
ENSMUSG00000034551	389.916	0.0195233	0.043326	0.114267	0.68887	Hdx	None
ENSMUSG00000024533	3387.3	0.0195028	0.0381015	0.272883	0.863401	Spire1	None
ENSMUSG00000024151	628.122	0.0195025	0.0420134	0.209688	0.817664	Msh2	None
ENSMUSG00000052962	514.244	0.0194649	0.0439174	0.0784069	0.61237	Mrpl35	None
ENSMUSG00000063406	665.8	0.0194484	0.0421736	0.166513	0.776417	Tmed5	None
ENSMUSG00000035131	294.824	0.0194237	0.0439111	0.0795121	0.615489	Brinp3	None
ENSMUSG00000036333	9648.58	0.0194151	0.0365984	0.283365	0.869938	Kidins220	None
ENSMUSG00000071359	1187.23	0.0193893	0.0416124	0.179102	0.792086	Tbpl1	None
ENSMUSG00000056938	658.769	0.019373	0.0418235	0.155646	0.75948	Acbd4	None
ENSMUSG00000020176	962.023	0.0193632	0.0439794	0.0744468	0.605782	Grb10	None
ENSMUSG00000068966	341.246	0.019344	0.0445526	0.0399986	0.493383	Zbtb34	None
ENSMUSG00000031099	814.451	0.0193072	0.0423745	0.15498	0.758115	Smarca1	None
ENSMUSG00000046807	401.99	0.0193055	0.0428726	0.128767	0.717418	Lrrc75b	None
ENSMUSG00000032932	1003.17	0.0192988	0.0401589	0.235872	0.843609	Hspa13	None
ENSMUSG00000028961	875.038	0.0192851	0.0407213	0.221963	0.827486	Pgd	None
ENSMUSG00000064210	798.809	0.0192575	0.0414059	0.209591	0.817664	Ano6	None
ENSMUSG00000103092	209.178	0.0192557	0.0446236	0.0303535	0.440623	Pcdha5	None
ENSMUSG00000110195	9745.75	0.0192469	0.0368654	0.40035	0.915626	Pde2a	None
ENSMUSG00000026188	357.905	0.0192392	0.0436672	0.088124	0.635044	Tmem169	None
ENSMUSG00000056167	1683.4	0.0192358	0.0397374	0.256021	0.854186	Cnot10	None
ENSMUSG00000001127	3311.83	0.0192305	0.0392057	0.261065	0.855741	Araf	None
ENSMUSG00000024726	387.464	0.0192243	0.0436257	0.0866545	0.632458	Carnmt1	None
ENSMUSG00000046994	614.996	0.0192182	0.0420104	0.17569	0.790748	Mars2	None
ENSMUSG00000043313	169.947	0.0192165	0.0445514	0.0456604	0.51185	Pcdhb19	None
ENSMUSG00000003721	1015.8	0.0192135	0.0429284	0.125798	0.712039	Insig2	None
ENSMUSG00000033880	513.281	0.0192058	0.0448389	0.0214484	0.384569	Lgals3bp	None
ENSMUSG00000037643	1317.82	0.0191954	0.0395832	0.284582	0.870319	Prkci	None
ENSMUSG00000046982	531.179	0.0191738	0.0425276	0.146766	0.746076	Tshz1	None
ENSMUSG00000051920	566.418	0.019171	0.0447902	0.0210659	0.381168	Rspo2	None
ENSMUSG00000066357	4413.23	0.0191625	0.0428489	0.180319	0.793378	Wdr6	None
ENSMUSG00000000838	1584	0.0191619	0.0408417	0.2236	0.829809	Fmr1	None
ENSMUSG00000030868	1689.12	0.0191418	0.0384846	0.259028	0.854223	Dctn5	None
ENSMUSG00000029168	827.46	0.0191056	0.0433799	0.0954972	0.654157	Dpysl5	None
ENSMUSG00000026819	1180.74	0.0191037	0.0394238	0.353097	0.899776	Slc25a25	None
ENSMUSG00000033382	1476.75	0.0190911	0.0390966	0.190606	0.802288	Trappc8	None
ENSMUSG00000082229	1746.39	0.0190605	0.0409934	0.210856	0.818525	Nap1l2	None
ENSMUSG00000030545	303.226	0.0190582	0.0438846	0.0742797	0.605782	Pex11a	None
ENSMUSG00000058392	393.397	0.0190509	0.0442097	0.0495743	0.534987	Rrp1b	None
ENSMUSG00000062866	1117.97	0.0190457	0.0432169	0.110438	0.682772	Phactr2	None
ENSMUSG00000028431	1553.28	0.0190419	0.0393892	0.258261	0.854223	Elp1	None
ENSMUSG00000038175	564.119	0.0190247	0.0423231	0.149916	0.749983	Mylip	None
ENSMUSG00000048814	4324.33	0.0190144	0.0364858	0.303621	0.885179	Lonrf2	None
ENSMUSG00000027180	1535.02	0.0190103	0.0390682	0.268252	0.861368	Fbxo3	None
ENSMUSG00000006740	5042.65	0.0189998	0.0372257	0.306165	0.885976	Kif5b	None
ENSMUSG00000025008	588.922	0.0189908	0.0429286	0.12071	0.703085	Tctn3	None
ENSMUSG00000036880	531.309	0.0189515	0.0436725	0.0786141	0.612525	Acaa2	None
ENSMUSG00000019772	312.024	0.0189424	0.0442432	0.0436117	0.507285	Vip	None
ENSMUSG00000036073	744.518	0.0189416	0.0419138	0.168129	0.779747	Galt	None
ENSMUSG00000021745	2697.86	0.0189342	0.039857	0.226728	0.833047	Ptprg	None
ENSMUSG00000021699	581.42	0.0189316	0.0417545	0.181488	0.793474	Pde4d	None
ENSMUSG00000021669	1915.19	0.0189098	0.0380613	0.291513	0.875121	Col4a3bp	None
ENSMUSG00000019852	3711.06	0.0188965	0.0378136	0.205004	0.814629	Arfgef3	None
ENSMUSG00000024887	351.949	0.0188859	0.0438566	0.0667475	0.589402	Asah2	None
ENSMUSG00000045639	869.508	0.0188718	0.0420739	0.163029	0.768679	Zfp629	None
ENSMUSG00000061298	246.085	0.0188443	0.0441174	0.0474648	0.524361	Agbl4	None
ENSMUSG00000031790	559.749	0.0188107	0.0426843	0.132496	0.723533	Mmp15	None
ENSMUSG00000005534	1521.69	0.0188098	0.041361	0.214641	0.821552	Insr	None
ENSMUSG00000064302	2481.65	0.0188044	0.0393859	0.262217	0.856723	Clasp1	None
ENSMUSG00000010608	4369.64	0.0188014	0.0387344	0.273843	0.864101	Rbm25	None
ENSMUSG00000043415	334.46	0.0187793	0.0434266	0.0883283	0.635044	Otud1	None
ENSMUSG00000040860	2697.94	0.0187783	0.0408611	0.20844	0.817263	Crocc	None
ENSMUSG00000040848	869.677	0.0187751	0.0426341	0.13477	0.726756	Sft2d2	None
ENSMUSG00000000792	556.727	0.0187694	0.0435311	0.0807088	0.617807	Slc5a5	None
ENSMUSG00000043542	1186.14	0.0187569	0.0411575	0.207434	0.816873	Zc2hc1a	None
ENSMUSG00000033128	1497.24	0.0187411	0.0389847	0.247544	0.849265	Gga1	None
ENSMUSG00000021796	1414.39	0.0187321	0.0389539	0.270987	0.862675	Bmpr1a	None
ENSMUSG00000020899	790.71	0.0187275	0.0421573	0.157996	0.760797	Pfas	None
ENSMUSG00000063632	450.352	0.0187245	0.0423143	0.153208	0.756777	Sox11	None
ENSMUSG00000032515	166.938	0.0187026	0.0446832	0.0122079	0.304518	Csrnp1	None
ENSMUSG00000047446	843.774	0.0186899	0.0421229	0.159175	0.761011	Arl4a	None
ENSMUSG00000038366	2157.13	0.0186481	0.0385576	0.279434	0.868172	Lasp1	None
ENSMUSG00000025899	953.232	0.0186414	0.041309	0.197103	0.808054	Alkbh8	None
ENSMUSG00000015709	6332.35	0.0186384	0.0391371	0.258751	0.854223	Arnt2	None
ENSMUSG00000029778	4690.8	0.0186341	0.0350642	0.335566	0.89528	Adcyap1r1	None
ENSMUSG00000022342	823.237	0.0186295	0.0417401	0.176999	0.79129	Kcnv1	None
ENSMUSG00000030704	11245.3	0.0186205	0.034937	0.331245	0.892631	Rab6a	None
ENSMUSG00000048834	2570.55	0.0185905	0.0399736	0.243988	0.846324	Vstm2a	None
ENSMUSG00000074748	4406.49	0.01859	0.0354065	0.330476	0.892572	Atxn7l3b	None
ENSMUSG00000047786	1357.05	0.0185799	0.0387063	0.290516	0.874121	Lix1	None
ENSMUSG00000036918	206.774	0.0185472	0.0438144	0.0552715	0.558587	Ttc7	None
ENSMUSG00000002105	612.912	0.0185459	0.0422922	0.209166	0.817429	Slc39a13	None
ENSMUSG00000028423	2320.42	0.0185356	0.0402421	0.236585	0.843609	Nfx1	None
ENSMUSG00000062151	497.005	0.0185348	0.0440834	0.0383723	0.480547	Unc13c	None
ENSMUSG00000037519	1152.86	0.0184974	0.0418334	0.171857	0.783632	Ppfia1	None
ENSMUSG00000021760	243.036	0.0184886	0.0445569	0.0113598	0.294859	Gpx8	None
ENSMUSG00000022987	362.342	0.0184823	0.0425817	0.131241	0.721689	Zfp641	None
ENSMUSG00000057133	2450.95	0.0184799	0.0406538	0.221293	0.827486	Chd6	None
ENSMUSG00000000058	630.527	0.0184776	0.0425974	0.129036	0.717418	Cav2	None
ENSMUSG00000049336	4406.14	0.0184753	0.0383133	0.291003	0.874347	Tenm2	None
ENSMUSG00000036461	172.989	0.0184701	0.0441667	0.0303871	0.440623	Elf1	None
ENSMUSG00000059810	645.501	0.0184665	0.042925	0.0934337	0.650852	Rgs3	None
ENSMUSG00000031367	1104.69	0.0184636	0.040249	0.236543	0.843609	Ap1s2	None
ENSMUSG00000068523	413.744	0.0184507	0.0424642	0.137136	0.730164	Gng5	None
ENSMUSG00000052397	1969.91	0.0184374	0.0428782	0.112801	0.686994	Ezr	None
ENSMUSG00000025855	10925.8	0.0184347	0.0380867	0.310259	0.886263	Prkar1b	None
ENSMUSG00000015189	1655.02	0.0184208	0.0391576	0.274257	0.864328	Casd1	None
ENSMUSG00000028134	2637.47	0.0184204	0.0398538	0.325151	0.891214	Ptbp2	None
ENSMUSG00000024172	463.934	0.0184015	0.042533	0.13176	0.722112	St6gal2	None
ENSMUSG00000017376	1472.41	0.0183853	0.0423115	0.143791	0.743436	Nlk	None
ENSMUSG00000038156	2423.12	0.0183744	0.0370674	0.316824	0.887527	Spon1	None
ENSMUSG00000026803	324.997	0.0183656	0.0441096	0.0298048	0.437115	Ttf1	None
ENSMUSG00000028803	2421.07	0.0183499	0.0372332	0.313827	0.887527	Nipal3	None
ENSMUSG00000056267	500.411	0.0183453	0.0422035	0.149064	0.748296	Cep70	None
ENSMUSG00000038331	379.894	0.0183377	0.044274	0.0259595	0.411617	Satb2	None
ENSMUSG00000038187	1379.17	0.0183187	0.0389213	0.274545	0.864404	Btbd10	None
ENSMUSG00000027894	11041.5	0.0182634	0.0333462	0.355022	0.900929	Slc6a17	None
ENSMUSG00000028184	1526.17	0.0182592	0.0424756	0.132016	0.722606	Adgrl2	None
ENSMUSG00000068566	1723.23	0.0182403	0.0388917	0.280275	0.868817	Myadm	None
ENSMUSG00000035596	2977.54	0.0182312	0.0416031	0.17911	0.792086	Mboat7	None
ENSMUSG00000045613	188.036	0.0182064	0.0437263	0.0479607	0.527245	Chrm2	None
ENSMUSG00000060904	2830.18	0.0181862	0.0378598	0.312682	0.886693	Arl1	None
ENSMUSG00000055943	2325.59	0.0181852	0.0379115	0.300249	0.883642	Emc7	None
ENSMUSG00000026457	1712.53	0.0181778	0.0376537	0.296936	0.880802	Adipor1	None
ENSMUSG00000028397	671.093	0.0181746	0.0420089	0.137104	0.730164	Kdm4c	None
ENSMUSG00000027288	6411.88	0.0181696	0.0403682	0.230858	0.837524	Zfp106	None
ENSMUSG00000050069	403.579	0.0181664	0.0434368	0.0684912	0.592271	Grem2	None
ENSMUSG00000018417	381.828	0.0181628	0.0426901	0.116788	0.697019	Myo1b	None
ENSMUSG00000021810	834.389	0.0181592	0.0400187	0.240652	0.845356	Ecd	None
ENSMUSG00000074643	736.352	0.0181338	0.0422974	0.136585	0.729677	Cpne1	None
ENSMUSG00000027668	1750.97	0.0181169	0.0397177	0.254517	0.853689	Mfn1	None
ENSMUSG00000060548	1395.24	0.0181161	0.0392537	0.268643	0.861387	Tnfrsf19	None
ENSMUSG00000024190	396.092	0.0180927	0.0439793	0.0273966	0.419241	Dusp1	None
ENSMUSG00000059974	2723.67	0.0180909	0.0396773	0.254974	0.853742	Ntm	None
ENSMUSG00000030002	2684.58	0.0180807	0.040277	0.232471	0.839606	Dusp11	None
ENSMUSG00000040938	474.623	0.0180629	0.0430869	0.0873972	0.634831	Slc16a11	None
ENSMUSG00000074749	341.671	0.0180462	0.0426301	0.117809	0.69711	Kiz	None
ENSMUSG00000024426	1167.1	0.0180438	0.0402373	0.23888	0.844653	Atat1	None
ENSMUSG00000030075	457.226	0.0180372	0.0420383	0.152181	0.753245	Cntn3	None
ENSMUSG00000037386	1639.26	0.0180272	0.0407845	0.212575	0.819633	Rims2	None
ENSMUSG00000026349	2824.25	0.0180034	0.0395923	0.257688	0.854223	Ccnt2	None
ENSMUSG00000049858	281.509	0.0179909	0.0427886	0.105153	0.672529	Suox	None
ENSMUSG00000020042	499.412	0.0179791	0.043079	0.0852459	0.626833	Btbd11	None
ENSMUSG00000024474	2178.99	0.0179466	0.0370202	0.329602	0.892572	Ik	None
ENSMUSG00000029469	724.979	0.0179216	0.0416865	0.159276	0.761011	Ift81	None
ENSMUSG00000005045	6368.74	0.0179049	0.0383288	0.282809	0.869938	Chd5	None
ENSMUSG00000032103	223.962	0.0179041	0.0436631	0.0510673	0.540504	Pus3	None
ENSMUSG00000054939	223.38	0.0179013	0.0432547	0.0696598	0.59674	Zfp174	None
ENSMUSG00000027550	563.561	0.0178905	0.041805	0.163023	0.768679	Lrrcc1	None
ENSMUSG00000029287	639.072	0.0178716	0.0427796	0.10211	0.665906	Tgfbr3	None
ENSMUSG00000024180	468.987	0.0178586	0.0418096	0.164476	0.771307	Tmem8	None
ENSMUSG00000037278	214.009	0.0178344	0.0432944	0.0635978	0.579781	Tmem97	None
ENSMUSG00000028164	297.603	0.0178301	0.0431822	0.0710904	0.599616	Manba	None
ENSMUSG00000020593	708.318	0.01783	0.0413958	0.184743	0.795659	Lpin1	None
ENSMUSG00000060147	629.12	0.0178214	0.0410902	0.199319	0.810536	Serpinb6a	None
ENSMUSG00000029328	5578.48	0.0177956	0.035724	0.355378	0.901095	Hnrnpdl	None
ENSMUSG00000049299	594.244	0.0177836	0.0412176	0.183663	0.795544	Trappc1	None
ENSMUSG00000043391	1440.51	0.0177649	0.0391713	0.273995	0.864101	2510009E07Rik	None
ENSMUSG00000033105	946.162	0.0177492	0.0426823	0.104402	0.672468	Lss	None
ENSMUSG00000022710	3699.39	0.017742	0.0384428	0.298579	0.882001	Usp7	None
ENSMUSG00000030878	359.765	0.0177245	0.043809	0.0236559	0.394971	Cdr2	None
ENSMUSG00000020311	904.813	0.0177134	0.0414131	0.182189	0.793474	Erlec1	None
ENSMUSG00000075224	397.51	0.017707	0.042804	0.0933914	0.650852	Lrrc55	None
ENSMUSG00000005501	627.789	0.0176806	0.0412898	0.188279	0.802255	Usp40	None
ENSMUSG00000024211	171.417	0.0176769	0.0441055	0.00672152	0.236605	Grm8	None
ENSMUSG00000046020	793.734	0.0176649	0.0400723	0.251949	0.852461	Pofut1	None
ENSMUSG00000072969	541.725	0.0176507	0.041821	0.158485	0.761011	Armcx5	None
ENSMUSG00000045205	720.754	0.0176441	0.0410928	0.193001	0.80537	Dpy19l4	None
ENSMUSG00000024425	9313.06	0.0176437	0.0371295	0.239801	0.845094	Ndfip1	None
ENSMUSG00000060090	338.293	0.0176285	0.0431795	0.0635332	0.579781	Rp2	None
ENSMUSG00000029676	394.062	0.0176264	0.0425891	0.106883	0.676925	Pot1a	None
ENSMUSG00000044024	2133.34	0.0176185	0.0413791	0.182631	0.793502	Rell2	None
ENSMUSG00000038079	632.226	0.0175983	0.0429222	0.0816791	0.621959	Tmem237	None
ENSMUSG00000031583	323.996	0.0175482	0.0422972	0.125461	0.712039	Wrn	None
ENSMUSG00000028180	4554.18	0.0175465	0.037443	0.320191	0.889085	Zranb2	None
ENSMUSG00000040711	479.602	0.0175451	0.0416304	0.169257	0.780897	Sh3pxd2b	None
ENSMUSG00000024548	1205.21	0.0175421	0.0392274	0.241706	0.845454	Setbp1	None
ENSMUSG00000032050	1984.92	0.0175315	0.0381841	0.30153	0.883642	Rdx	None
ENSMUSG00000075376	1731.25	0.0175266	0.0384003	0.297445	0.880802	Rc3h2	None
ENSMUSG00000030654	6207.34	0.0175058	0.0394728	0.258572	0.854223	Arl6ip1	None
ENSMUSG00000031841	1342.27	0.0174981	0.0430737	0.0671727	0.589402	Cdh13	None
ENSMUSG00000019986	6748.6	0.0174965	0.0394233	0.22258	0.827533	Ahi1	None
ENSMUSG00000031229	4967.73	0.0174958	0.0402636	0.248531	0.849922	Atrx	None
ENSMUSG00000021027	3792.74	0.0174954	0.0369006	0.345487	0.897463	Ralgapa1	None
ENSMUSG00000021500	2301.72	0.0174943	0.0382578	0.298844	0.882301	Ddx46	None
ENSMUSG00000072694	1885.85	0.0174917	0.0378899	0.303361	0.885179	1500011B03Rik	None
ENSMUSG00000040652	3970.07	0.0174868	0.0388164	0.310932	0.886263	Oaz2	None
ENSMUSG00000042156	2707.79	0.0174578	0.0385679	0.309566	0.886263	Dzip1	None
ENSMUSG00000010803	5816.41	0.0174494	0.0407014	0.102696	0.66825	Gabra1	None
ENSMUSG00000026155	1847.15	0.0174448	0.0378863	0.311475	0.886263	Smap1	None
ENSMUSG00000002949	1387.97	0.0174385	0.0398445	0.257051	0.854186	Timm44	None
ENSMUSG00000020063	350.788	0.0174343	0.0420866	0.136405	0.729238	Sirt1	None
ENSMUSG00000033983	457.527	0.0174179	0.0415542	0.17182	0.783632	Coil	None
ENSMUSG00000022621	607.769	0.0174088	0.0412132	0.177486	0.79129	Rabl2	None
ENSMUSG00000026463	3456.88	0.0174041	0.043911	0.00784392	0.246077	Atp2b4	None
ENSMUSG00000022246	269.032	0.017393	0.0437332	0.0157525	0.342529	Rai14	None
ENSMUSG00000023286	743.28	0.0173895	0.0403128	0.346238	0.897463	Ube2j2	None
ENSMUSG00000013878	911.432	0.0173842	0.0409349	0.204007	0.813869	Rnf170	None
ENSMUSG00000066415	1342.11	0.0173675	0.0381052	0.310332	0.886263	Msl2	None
ENSMUSG00000031242	1537.25	0.0173572	0.037946	0.311351	0.886263	2610002M06Rik	None
ENSMUSG00000028456	1833.52	0.0173364	0.0379461	0.28602	0.871167	Unc13b	None
ENSMUSG00000059070	2175.69	0.0173293	0.0387911	0.291682	0.87518	Rpl18	None
ENSMUSG00000027130	3420.06	0.0173279	0.0379035	0.315349	0.887527	Slc12a6	None
ENSMUSG00000022338	1598.15	0.0173088	0.0374134	0.325194	0.891214	Eny2	None
ENSMUSG00000043639	97.8512	0.0172847	0.0438154	0.00824728	0.249747	Rbm20	None
ENSMUSG00000029171	176.664	0.0172713	0.0431293	0.0527335	0.55059	Pgm2	None
ENSMUSG00000042751	3331.14	0.0172713	0.036319	0.353656	0.900419	Nmnat2	None
ENSMUSG00000060671	2068.49	0.0172621	0.0386891	0.287212	0.871918	Atp8b2	None
ENSMUSG00000004207	32770.6	0.017236	0.0372132	0.390852	0.912407	Psap	None
ENSMUSG00000017858	578.995	0.0172151	0.0417305	0.156667	0.76018	Ift52	None
ENSMUSG00000031772	555.449	0.0172059	0.0431463	0.0485282	0.530807	Cntnap4	None
ENSMUSG00000001999	209.944	0.0172025	0.0429909	0.0609357	0.572673	Blvra	None
ENSMUSG00000037492	1120.17	0.0172013	0.0415388	0.168313	0.78008	Zmat4	None
ENSMUSG00000019437	375.397	0.017193	0.0426333	0.0883974	0.635044	Tlcd1	None
ENSMUSG00000042211	1234.05	0.0171813	0.0386813	0.293937	0.877131	Fbxo38	None
ENSMUSG00000036940	1408.44	0.0171759	0.0383305	0.305747	0.885976	Kdm1a	None
ENSMUSG00000045034	498.634	0.0171681	0.0427563	0.0778331	0.609803	Ankrd34b	None
ENSMUSG00000116138	236.996	0.0171658	0.0431751	0.0442944	0.507285	C030006K11Rik	None
ENSMUSG00000027195	1369.07	0.0171558	0.0381853	0.30481	0.88592	Hsd17b12	None
ENSMUSG00000057455	1368.02	0.0171201	0.0409665	0.305761	0.885976	Rit2	None
ENSMUSG00000025208	588.134	0.0171187	0.0409383	0.20194	0.813344	Mrpl43	None
ENSMUSG00000047098	679.423	0.0171001	0.0404744	0.2252	0.831752	Rnf31	None
ENSMUSG00000037533	1358.28	0.0170629	0.0391984	0.277199	0.86754	Rapgef6	None
ENSMUSG00000028879	2893.32	0.0170593	0.0371234	0.346866	0.897463	Stx12	None
ENSMUSG00000052852	2454.81	0.0170521	0.037551	0.300218	0.883642	Reep1	None
ENSMUSG00000025059	711.406	0.0170166	0.0409545	0.199034	0.810133	Gk	None
ENSMUSG00000026201	984.13	0.017013	0.0397511	0.219983	0.827316	Stk16	None
ENSMUSG00000020253	428.264	0.0170116	0.0425582	0.0878473	0.634928	Ppm1m	None
ENSMUSG00000047126	12216.4	0.0170106	0.0330498	0.39459	0.912819	Cltc	None
ENSMUSG00000050822	1024.47	0.0170047	0.0417973	0.146214	0.74586	Slc29a4	None
ENSMUSG00000048612	282.127	0.0170036	0.0424566	0.0959502	0.654227	Myof	None
ENSMUSG00000042997	344	0.0169741	0.0417817	0.146417	0.74586	Nhlrc3	None
ENSMUSG00000032320	2639.89	0.0169725	0.0395452	0.264237	0.858805	Rcn2	None
ENSMUSG00000041559	436.364	0.0169541	0.0434797	0.0145749	0.331599	Fmod	None
ENSMUSG00000021731	451.842	0.0169457	0.041337	0.17562	0.790748	Mrps30	None
ENSMUSG00000021779	875.905	0.0169378	0.0421429	0.118764	0.698279	Thrb	None
ENSMUSG00000049422	1857.42	0.0169358	0.0386391	0.264684	0.858805	Chchd10	None
ENSMUSG00000022122	1275.99	0.0169214	0.0394555	0.27293	0.863401	Ednrb	None
ENSMUSG00000004865	1639.74	0.0169169	0.0377512	0.322727	0.890013	Srpk1	None
ENSMUSG00000027405	2261.13	0.0169103	0.0383843	0.303407	0.885179	Nop56	None
ENSMUSG00000060450	6547.67	0.0169037	0.0349958	0.31103	0.886263	Rnf14	None
ENSMUSG00000037784	553.613	0.0168817	0.041322	0.18008	0.79315	Dzip1l	None
ENSMUSG00000015748	515.108	0.0168759	0.0417109	0.149326	0.748426	Prpf3	None
ENSMUSG00000026578	518.64	0.0168748	0.0407206	0.206037	0.815551	Ccdc181	None
ENSMUSG00000041915	752.944	0.0168638	0.0400846	0.244847	0.846811	Ammecr1l	None
ENSMUSG00000063760	519.245	0.0168372	0.0412314	0.220679	0.827468	Rnf217	None
ENSMUSG00000078234	655.491	0.0168287	0.0422366	0.110922	0.683182	Klhdc7a	None
ENSMUSG00000050310	1558.04	0.0168253	0.0386599	0.295195	0.878581	Rictor	None
ENSMUSG00000022536	5150.24	0.0168217	0.0350091	0.371002	0.904837	Glyr1	None
ENSMUSG00000017291	3664.4	0.0168162	0.0372212	0.341056	0.897446	Taok1	None
ENSMUSG00000037461	858.946	0.0168099	0.0392596	0.274503	0.864404	Ints7	None
ENSMUSG00000029822	546.705	0.0168051	0.041217	0.180631	0.793474	Osbpl3	None
ENSMUSG00000021390	368.537	0.0167936	0.0426988	0.0673383	0.589402	Ogn	None
ENSMUSG00000027848	439.915	0.0167688	0.0412918	0.175337	0.790133	Olfml3	None
ENSMUSG00000025272	4805.46	0.0167639	0.0391609	0.252332	0.852461	Tro	None
ENSMUSG00000074746	1433.16	0.0167603	0.0378544	0.323332	0.890534	Pdzd8	None
ENSMUSG00000039385	266.392	0.0167513	0.0426525	0.0689771	0.594167	Cdh6	None
ENSMUSG00000019087	7080.85	0.0167494	0.0336809	0.389519	0.91169	Atp6ap1	None
ENSMUSG00000044562	138.237	0.0167335	0.0430734	0.0331835	0.458402	Rasip1	None
ENSMUSG00000022353	1081.78	0.0167332	0.0406879	0.203427	0.813869	Mtss1	None
ENSMUSG00000041889	2016.48	0.0167271	0.0393649	0.303756	0.885179	Shisa4	None
ENSMUSG00000028719	1497.95	0.0167243	0.041065	0.176863	0.79129	Cmpk1	None
ENSMUSG00000067194	3574.85	0.0167021	0.0364663	0.352144	0.899682	Eif1ax	None
ENSMUSG00000068428	191.783	0.0167002	0.0433976	0.0103106	0.276968	Gmnc	None
ENSMUSG00000057751	150.225	0.0166771	0.0434337	0.00824085	0.249747	Megf6	None
ENSMUSG00000030452	813.887	0.0166749	0.041665	0.146076	0.74586	Nipa2	None
ENSMUSG00000019256	251.974	0.0166714	0.0423491	0.0927072	0.648857	Ahr	None
ENSMUSG00000004317	296.957	0.0166687	0.0424858	0.0793894	0.614904	Clcn5	None
ENSMUSG00000033792	235.495	0.0166687	0.0433145	0.0138303	0.325813	Atp7a	None
ENSMUSG00000037857	786.659	0.0166303	0.0415102	0.138324	0.732023	Nufip2	None
ENSMUSG00000020520	307.583	0.0166209	0.041958	0.122884	0.708806	Galnt10	None
ENSMUSG00000021466	1271.74	0.0166192	0.0381726	0.317596	0.888157	Ptch1	None
ENSMUSG00000023017	769.628	0.0166136	0.0409877	0.195495	0.806269	Asic1	None
ENSMUSG00000072568	665.566	0.0166072	0.0423338	0.0927904	0.648857	Lratd2	None
ENSMUSG00000045672	259.245	0.0166072	0.0422345	0.103452	0.669874	Col27a1	None
ENSMUSG00000039179	145.279	0.0165887	0.0430902	0.0249897	0.403101	Tekt5	None
ENSMUSG00000020029	2304.03	0.0165805	0.0361651	0.365119	0.903902	Nudt4	None
ENSMUSG00000059173	4641.67	0.0165695	0.0386971	0.297972	0.881319	Pde1a	None
ENSMUSG00000035666	1191.13	0.0165624	0.0384521	0.307239	0.886263	Gtf3c4	None
ENSMUSG00000037110	864.759	0.0165558	0.0404765	0.202556	0.81383	Ralgapa2	None
ENSMUSG00000036782	702.412	0.0165368	0.041039	0.182126	0.793474	Klhl13	None
ENSMUSG00000003421	921.704	0.0165316	0.0394547	0.271345	0.862675	Nosip	None
ENSMUSG00000034707	2485.62	0.0165224	0.0377046	0.332291	0.893492	Gns	None
ENSMUSG00000002413	3770.41	0.0165072	0.0384099	0.308869	0.886263	Braf	None
ENSMUSG00000025324	246.725	0.0164755	0.0422266	0.094768	0.652502	Atp10a	None
ENSMUSG00000021051	2116.51	0.016453	0.0373996	0.347358	0.897463	Ppp2r5e	None
ENSMUSG00000059540	813.02	0.0164394	0.0408783	0.19092	0.802988	Tcea2	None
ENSMUSG00000036403	374.2	0.0164385	0.041375	0.163526	0.769911	Cep135	None
ENSMUSG00000038615	7536.83	0.0163851	0.037591	0.317192	0.887596	Nfe2l1	None
ENSMUSG00000027122	865.76	0.016377	0.039867	0.240694	0.845356	Arl14ep	None
ENSMUSG00000020541	399.295	0.0163697	0.0416216	0.142058	0.741442	Tom1l1	None
ENSMUSG00000027188	341.653	0.0163582	0.0425404	0.0623614	0.577309	Pamr1	None
ENSMUSG00000034120	3607.53	0.0163541	0.0355768	0.392686	0.912548	Srsf2	None
ENSMUSG00000074863	192.199	0.0163426	0.0423084	0.0826102	0.622108	Platr25	None
ENSMUSG00000022898	623.865	0.0163414	0.0405966	0.21154	0.819234	Vps26c	None
ENSMUSG00000020451	2930.12	0.0163172	0.0369657	0.357961	0.901095	Limk2	None
ENSMUSG00000050721	321.524	0.0163125	0.0416663	0.137266	0.73026	Plekho2	None
ENSMUSG00000033184	2351.03	0.016299	0.0374112	0.320806	0.889662	Tmed7	None
ENSMUSG00000034109	750.067	0.0162883	0.0400429	0.242284	0.845596	Golim4	None
ENSMUSG00000042105	2618.99	0.0162694	0.0364803	0.325131	0.891214	Inpp5f	None
ENSMUSG00000028701	498.158	0.0162637	0.0408227	0.198164	0.809609	Lurap1	None
ENSMUSG00000042734	1118.12	0.0162255	0.0395513	0.271193	0.862675	Ttc9	None
ENSMUSG00000036932	592.696	0.0162229	0.0404052	0.228395	0.835212	Aifm1	None
ENSMUSG00000036752	5624.51	0.0162222	0.0351441	0.346227	0.897463	Tubb4b	None
ENSMUSG00000029625	697.491	0.0161612	0.0404503	0.351655	0.899566	Cpsf4	None
ENSMUSG00000038991	1258.9	0.0161575	0.0380627	0.320673	0.889662	Txndc5	None
ENSMUSG00000029472	5009.96	0.016153	0.0338917	0.4045	0.917935	Anapc5	None
ENSMUSG00000040387	422.577	0.0161277	0.0410119	0.18306	0.793776	Klhl32	None
ENSMUSG00000002475	1085.9	0.0161201	0.0388068	0.298468	0.882001	Abhd3	None
ENSMUSG00000040843	929.853	0.0160986	0.0403765	0.224079	0.829809	Tiprl	None
ENSMUSG00000024998	387.072	0.016091	0.0411489	0.172339	0.784593	Plce1	None
ENSMUSG00000039741	802.921	0.0160909	0.0402357	0.232493	0.839606	Bahcc1	None
ENSMUSG00000008429	941.159	0.0160747	0.0393779	0.34331	0.897446	Herpud2	None
ENSMUSG00000067879	5312.83	0.0160725	0.0374304	0.359872	0.901368	Vxn	None
ENSMUSG00000040412	981.475	0.0160657	0.0402937	0.227145	0.833525	5330417C22Rik	None
ENSMUSG00000050088	455.138	0.0160609	0.0408828	0.191968	0.804076	1600012H06Rik	None
ENSMUSG00000020604	611.991	0.0160573	0.0423464	0.0663701	0.588248	Arsg	None
ENSMUSG00000030774	6320.14	0.0160437	0.0339865	0.394121	0.912548	Pak1	None
ENSMUSG00000020571	2343.95	0.0160419	0.037139	0.351069	0.899566	Pdia6	None
ENSMUSG00000038024	560.523	0.016027	0.04022	0.229698	0.836566	Dennd4c	None
ENSMUSG00000019966	692.297	0.0160266	0.0400301	0.241381	0.845356	Kitl	None
ENSMUSG00000032803	1707.23	0.0160216	0.0378786	0.316276	0.887527	Cdv3	None
ENSMUSG00000032601	1348.32	0.0160081	0.040765	0.197946	0.809227	Prkar2a	None
ENSMUSG00000030515	782.51	0.016003	0.0395906	0.267309	0.861111	Tarsl2	None
ENSMUSG00000026019	801.011	0.0160006	0.0402378	0.269898	0.862675	Wdr12	None
ENSMUSG00000037206	393.229	0.0159998	0.0414364	0.146305	0.74586	Islr	None
ENSMUSG00000059878	581.569	0.0159985	0.0400971	0.228579	0.835212	Zfp422	None
ENSMUSG00000038354	279.791	0.0159973	0.0419946	0.0970063	0.655242	Ankrd35	None
ENSMUSG00000024736	3700.52	0.0159951	0.0388359	0.303895	0.885179	Tmem132a	None
ENSMUSG00000025795	392.544	0.0159788	0.0416613	0.126583	0.714081	Rassf3	None
ENSMUSG00000040181	220.24	0.0159748	0.0424088	0.0557047	0.560129	Fmo1	None
ENSMUSG00000084883	1152.34	0.0159583	0.0393278	0.275289	0.865289	Ccdc85c	None
ENSMUSG00000021048	975.06	0.0159556	0.0402191	0.235025	0.841665	Mthfd1	None
ENSMUSG00000029185	162.198	0.0159553	0.0424433	0.0513853	0.542369	Fam114a1	None
ENSMUSG00000025209	354.585	0.0159527	0.0416572	0.126729	0.7146	Twnk	None
ENSMUSG00000029068	3502.27	0.0159329	0.0353359	0.419845	0.921962	Ccnl2	None
ENSMUSG00000041058	897.843	0.0159246	0.039974	0.223854	0.829809	Wwp1	None
ENSMUSG00000021360	504.251	0.0159137	0.0408361	0.192076	0.804076	Gcnt2	None
ENSMUSG00000029505	2624.71	0.0159073	0.0392167	0.275249	0.865289	Ep400	None
ENSMUSG00000037720	2328.82	0.015899	0.0375873	0.306645	0.885976	Tmem33	None
ENSMUSG00000041272	260.334	0.0158974	0.0421687	0.0744609	0.605782	Tox	None
ENSMUSG00000031066	4020.04	0.0158854	0.0343049	0.393759	0.912548	Usp11	None
ENSMUSG00000040464	245.649	0.0158803	0.0418855	0.105197	0.672529	Gtpbp10	None
ENSMUSG00000022114	620.117	0.0158773	0.0409217	0.184061	0.795659	Spry2	None
ENSMUSG00000054723	303.181	0.0158687	0.0418042	0.109979	0.682229	Vmac	None
ENSMUSG00000026192	586.887	0.0158631	0.0400077	0.234263	0.840607	Atic	None
ENSMUSG00000033966	568.46	0.0158544	0.0421553	0.0777611	0.609803	Cdkl4	None
ENSMUSG00000037965	1107.57	0.0158542	0.0394611	0.266508	0.860217	Zc3h7a	None
ENSMUSG00000021592	195.461	0.0158499	0.0421412	0.0732962	0.60417	Arsk	None
ENSMUSG00000035776	1669.62	0.0158368	0.0380598	0.324787	0.891214	Cd99l2	None
ENSMUSG00000027104	2079.12	0.0158185	0.0371505	0.364051	0.903795	Atf2	None
ENSMUSG00000022216	723.651	0.0158169	0.0399934	0.241267	0.845356	Psme1	None
ENSMUSG00000035576	273.215	0.0157834	0.0421194	0.0750814	0.606646	L3mbtl1	None
ENSMUSG00000071660	788.333	0.0157779	0.0397986	0.244446	0.84646	Ttc9c	None
ENSMUSG00000029101	1080.26	0.015757	0.0396289	0.263236	0.858338	Rgs12	None
ENSMUSG00000039601	2149.45	0.0157531	0.0364837	0.36206	0.90321	Rcan2	None
ENSMUSG00000047213	1812.56	0.0157525	0.0376874	0.312186	0.886263	Ythdf3	None
ENSMUSG00000024427	290.037	0.0157522	0.0414587	0.144145	0.743436	Spry4	None
ENSMUSG00000031391	3585.94	0.0157328	0.0386869	0.32535	0.891214	L1cam	None
ENSMUSG00000042826	950.446	0.0157206	0.0413649	0.142307	0.741648	Fgf11	None
ENSMUSG00000066043	288.662	0.015714	0.0418526	0.097882	0.656092	Phactr4	None
ENSMUSG00000037416	1769.75	0.0156947	0.0367206	0.366727	0.903902	Dmxl1	None
ENSMUSG00000004591	786.308	0.0156937	0.0393273	0.271541	0.862885	Pkn2	None
ENSMUSG00000039110	145.988	0.0156903	0.0426038	0.023658	0.394971	Mycbpap	None
ENSMUSG00000030265	2157.22	0.015681	0.0361184	0.333431	0.894391	Kras	None
ENSMUSG00000022856	211.075	0.0156809	0.0418632	0.0993076	0.659463	Tmem41a	None
ENSMUSG00000033706	1108.04	0.0156362	0.0391143	0.324018	0.891139	Smyd5	None
ENSMUSG00000052301	365	0.0156323	0.0421228	0.0680646	0.590857	Doc2a	None
ENSMUSG00000020300	3213.18	0.0156238	0.0369329	0.363358	0.903795	Cpeb4	None
ENSMUSG00000039410	573.357	0.0156225	0.0416224	0.118217	0.69711	Prdm16	None
ENSMUSG00000043091	229.596	0.0156212	0.0427083	0.0130171	0.315351	Tuba1c	None
ENSMUSG00000078185	189.283	0.0156207	0.0419732	0.0826713	0.622108	Chml	None
ENSMUSG00000047036	5463.27	0.0156153	0.0379341	0.295946	0.879703	Zfp445	None
ENSMUSG00000019880	350.291	0.0156045	0.0420862	0.0699023	0.597687	Rspo3	None
ENSMUSG00000039478	2038.73	0.015595	0.0372252	0.41626	0.921962	Micu3	None
ENSMUSG00000053916	322.568	0.0155939	0.0413544	0.142246	0.741648	Nanp	None
ENSMUSG00000045624	589.866	0.015578	0.0396964	0.259551	0.854223	Esf1	None
ENSMUSG00000041329	9569.31	0.015574	0.0370247	0.360339	0.901675	Atp1b2	None
ENSMUSG00000051527	782.005	0.0155628	0.0415217	0.121493	0.705115	Usp29	None
ENSMUSG00000001018	990.156	0.0155562	0.0386051	0.312938	0.886693	Snapin	None
ENSMUSG00000022668	615.294	0.0155518	0.0402226	0.227921	0.835075	Gtpbp8	None
ENSMUSG00000037747	2982.66	0.01553	0.0373898	0.364462	0.903795	Phyhipl	None
ENSMUSG00000020919	490.977	0.0155255	0.040814	0.190487	0.802288	Stat5b	None
ENSMUSG00000029330	2061.23	0.0155154	0.0403555	0.219113	0.826596	Cds1	None
ENSMUSG00000036775	652.015	0.0155125	0.0399786	0.31316	0.886807	Decr2	None
ENSMUSG00000047502	270.733	0.0155114	0.0418662	0.0886173	0.635925	Mroh7	None
ENSMUSG00000019961	784.121	0.0154917	0.0397981	0.256899	0.854186	Tmpo	None
ENSMUSG00000031634	827.834	0.0154831	0.0393048	0.270613	0.862675	Ufsp2	None
ENSMUSG00000003923	690.234	0.0154801	0.0400041	0.241947	0.845596	Tfam	None
ENSMUSG00000068748	5949.16	0.0154712	0.0369614	0.363169	0.903795	Ptprz1	None
ENSMUSG00000073514	2729.01	0.0154499	0.0376768	0.348107	0.898026	Dok6	None
ENSMUSG00000062762	2184.04	0.0154444	0.0358718	0.380757	0.908231	Ei24	None
ENSMUSG00000044288	4471.02	0.0154356	0.0362021	0.37989	0.907735	Cnr1	None
ENSMUSG00000030102	10399.5	0.0154304	0.0366145	0.390559	0.912064	Itpr1	None
ENSMUSG00000056394	190.362	0.0154106	0.0421549	0.0529332	0.55059	Lig1	None
ENSMUSG00000049090	586.347	0.0153975	0.0398081	0.248746	0.850158	Zadh2	None
ENSMUSG00000046785	3584.68	0.0153895	0.0350266	0.325235	0.891214	Epm2aip1	None
ENSMUSG00000039706	883.292	0.015386	0.0418311	0.0855441	0.627291	Ldb2	None
ENSMUSG00000009828	779.606	0.015381	0.0402064	0.224675	0.830752	Ick	None
ENSMUSG00000068615	108.634	0.0153695	0.0424053	0.0257317	0.411617	Gjd2	None
ENSMUSG00000079598	786.234	0.0153295	0.0411659	0.160407	0.764181	Clec2l	None
ENSMUSG00000024431	2164.47	0.0153266	0.0371777	0.358415	0.901095	Nr3c1	None
ENSMUSG00000013663	3955.99	0.0153197	0.0343651	0.429648	0.926899	Pten	None
ENSMUSG00000025935	645.511	0.0153192	0.0404191	0.212793	0.819633	Tram1	None
ENSMUSG00000021234	410.076	0.0153169	0.0410082	0.163957	0.770655	Fam161b	None
ENSMUSG00000035835	1059.32	0.0153167	0.0412702	0.127228	0.715153	Plppr3	None
ENSMUSG00000054484	597.663	0.0153112	0.040514	0.206296	0.815828	Tmem62	None
ENSMUSG00000054693	2124.5	0.0153068	0.0364643	0.376899	0.905792	Adam10	None
ENSMUSG00000024798	250.411	0.0152888	0.0419944	0.0644193	0.582896	Htr7	None
ENSMUSG00000041920	485.883	0.0152878	0.0420546	0.0570718	0.564755	Slc16a6	None
ENSMUSG00000024924	2471.54	0.0152741	0.038109	0.289978	0.873474	Vldlr	None
ENSMUSG00000021911	823.422	0.0152623	0.0401569	0.23075	0.837524	Parg	None
ENSMUSG00000007837	116.842	0.0152587	0.0424369	0.0178	0.358028	Prrg2	None
ENSMUSG00000052331	288.283	0.0152573	0.0421166	0.048706	0.531419	Ankrd44	None
ENSMUSG00000040856	308.755	0.0152546	0.0421684	0.0425522	0.504411	Dlk1	None
ENSMUSG00000041817	1321.65	0.0152514	0.037142	0.363545	0.903795	Fam169a	None
ENSMUSG00000040990	726.315	0.0152474	0.0395101	0.268904	0.861387	Sh3kbp1	None
ENSMUSG00000026972	159.594	0.0152373	0.0419527	0.0658362	0.586658	Arrdc1	None
ENSMUSG00000020290	2168.26	0.0152334	0.036065	0.392985	0.912548	Xpo1	None
ENSMUSG00000075470	1352.23	0.015232	0.0378895	0.337424	0.896336	Alg10b	None
ENSMUSG00000031523	1466.56	0.015232	0.0373689	0.36095	0.902229	Dlc1	None
ENSMUSG00000044912	1517.92	0.0152233	0.0378001	0.342775	0.897446	Syt16	None
ENSMUSG00000037656	1382.24	0.0152215	0.0381923	0.320817	0.889662	Slc20a2	None
ENSMUSG00000024940	1091.27	0.0152166	0.041127	0.157275	0.760616	Ltbp3	None
ENSMUSG00000028582	715.43	0.01521	0.0406953	0.189971	0.802288	Cc2d1b	None
ENSMUSG00000038371	1753.48	0.0152021	0.0365576	0.385793	0.909549	Sbf2	None
ENSMUSG00000024766	144.261	0.0151893	0.0419289	0.0659449	0.586658	Lipo3	None
ENSMUSG00000074607	522.035	0.0151802	0.0416622	0.0956623	0.654157	Tox2	None
ENSMUSG00000018537	576.817	0.015173	0.0397556	0.256776	0.854186	Pcgf2	None
ENSMUSG00000041815	1637.55	0.0151706	0.0376327	0.346962	0.897463	Poldip3	None
ENSMUSG00000106379	433.697	0.0151631	0.0407599	0.177417	0.79129	Lhfpl3	None
ENSMUSG00000022200	1968.43	0.0151629	0.0361466	0.396846	0.912947	Golph3	None
ENSMUSG00000025066	1680.46	0.0151618	0.0381266	0.374235	0.90529	Sfr1	None
ENSMUSG00000028530	4322.48	0.0151505	0.0350836	0.341751	0.897446	Jak1	None
ENSMUSG00000071650	3040.22	0.0151501	0.0363393	0.388172	0.910164	Ganab	None
ENSMUSG00000027305	378.445	0.0151449	0.0405714	0.198519	0.809609	Ndufaf1	None
ENSMUSG00000051427	765.858	0.0151445	0.0410291	0.161988	0.767508	Ccdc157	None
ENSMUSG00000028228	434.09	0.0151316	0.0410179	0.160593	0.764233	Cpne3	None
ENSMUSG00000062421	921.081	0.0151282	0.0385922	0.351417	0.899566	Arf2	None
ENSMUSG00000030303	485.571	0.0151141	0.0410768	0.153714	0.757396	Far2	None
ENSMUSG00000014907	329.817	0.0151119	0.0413393	0.127196	0.715153	Naf1	None
ENSMUSG00000014905	912.959	0.0150996	0.0398173	0.261071	0.855741	Dnajb9	None
ENSMUSG00000056050	2603.3	0.0150905	0.0362252	0.392198	0.912548	Mia3	None
ENSMUSG00000063239	298.006	0.015085	0.0416603	0.0909011	0.643263	Grm4	None
ENSMUSG00000023883	1364.45	0.0150803	0.0376453	0.359342	0.901095	Phf10	None
ENSMUSG00000030386	367.737	0.0150766	0.0410002	0.161257	0.765757	Zfp606	None
ENSMUSG00000040543	1427.39	0.0150743	0.0388652	0.302805	0.884536	Pitpnm3	None
ENSMUSG00000038718	176.19	0.0150535	0.0418576	0.06672	0.589402	Pbx3	None
ENSMUSG00000000823	2619.66	0.0150281	0.0364698	0.406004	0.917935	Zfp512b	None
ENSMUSG00000032507	970.546	0.0150275	0.0385791	0.369002	0.903902	Fbxl2	None
ENSMUSG00000056870	125.469	0.0150256	0.0422041	0.0275525	0.420096	Gulp1	None
ENSMUSG00000050668	602.481	0.0150103	0.0414829	0.108225	0.678467	Gpatch11	None
ENSMUSG00000028863	1865.69	0.015003	0.0367773	0.37529	0.90529	Meaf6	None
ENSMUSG00000033420	510.011	0.0149999	0.0416868	0.0842907	0.623694	Antxr1	None
ENSMUSG00000047888	3165.64	0.0149846	0.0386461	0.305212	0.885976	Tnrc6b	None
ENSMUSG00000027878	1215.68	0.0149833	0.0409131	0.163874	0.770655	Notch2	None
ENSMUSG00000035473	104.139	0.0149768	0.0422182	0.0237223	0.394971	Galm	None
ENSMUSG00000027710	849.315	0.0149716	0.0397962	0.25995	0.854223	Acad9	None
ENSMUSG00000029823	5515.69	0.0149435	0.0361995	0.388909	0.911295	Luc7l2	None
ENSMUSG00000049232	311.31	0.0149415	0.0409893	0.157564	0.760657	Tigd2	None
ENSMUSG00000023991	998.668	0.0149275	0.0381805	0.336175	0.89528	Foxp4	None
ENSMUSG00000021767	1617.7	0.0149244	0.0380856	0.336552	0.89528	Kat6b	None
ENSMUSG00000027652	3431.86	0.0149046	0.0373478	0.389854	0.91182	Ralgapb	None
ENSMUSG00000042216	2183.05	0.0149032	0.0376226	0.351272	0.899566	Sgsm1	None
ENSMUSG00000067787	2117.62	0.0148998	0.0375112	0.34546	0.897463	Blcap	None
ENSMUSG00000023170	393.848	0.0148984	0.0403791	0.205309	0.815129	Gps2	None
ENSMUSG00000051285	3307.54	0.0148796	0.0365858	0.382688	0.908426	Pcmtd1	None
ENSMUSG00000035944	188.085	0.0148597	0.0415302	0.0950502	0.653414	Ttc38	None
ENSMUSG00000039630	12248.2	0.014858	0.0321528	0.445537	0.932419	Hnrnpu	None
ENSMUSG00000044149	692.514	0.0148573	0.0389238	0.28756	0.871918	Nkrf	None
ENSMUSG00000026153	749.183	0.0148478	0.0396489	0.258654	0.854223	Fam135a	None
ENSMUSG00000039530	3343.04	0.0148467	0.0369696	0.377009	0.905792	Tusc3	None
ENSMUSG00000032340	2614.47	0.0148456	0.0368369	0.415645	0.921962	Neo1	None
ENSMUSG00000019894	1536.05	0.0148364	0.0378654	0.345588	0.897463	Slc6a15	None
ENSMUSG00000030816	1601.97	0.0148343	0.0369421	0.375526	0.90529	Rnf40	None
ENSMUSG00000068617	377.085	0.0148283	0.0405175	0.196438	0.807579	Efcab1	None
ENSMUSG00000026896	92.9543	0.014818	0.0421942	0.0169019	0.350419	Ifih1	None
ENSMUSG00000038816	643.783	0.0147956	0.0412519	0.124396	0.710011	Ctnnal1	None
ENSMUSG00000035949	1474.18	0.0147947	0.0369346	0.350488	0.899213	Fbxw2	None
ENSMUSG00000004609	194.532	0.0147745	0.0419848	0.0370141	0.473542	Cd33	None
ENSMUSG00000048355	536.519	0.0147618	0.0403118	0.21302	0.819755	Arxes1	None
ENSMUSG00000025151	13491	0.0147597	0.035766	0.475533	0.938153	Maged1	None
ENSMUSG00000030826	283.019	0.0147563	0.0408913	0.160487	0.764233	Bcat2	None
ENSMUSG00000062980	135.001	0.0147312	0.0420516	0.0276155	0.420565	Cped1	None
ENSMUSG00000032193	548.699	0.0147311	0.0403762	0.210426	0.818525	Ldlr	None
ENSMUSG00000052364	686.085	0.0147235	0.0407615	0.171952	0.783788	B630019K06Rik	None
ENSMUSG00000047021	625.607	0.0147229	0.0415452	0.0819333	0.622108	Cfap65	None
ENSMUSG00000072964	1680.21	0.0146845	0.0376405	0.350093	0.899076	Bhlhb9	None
ENSMUSG00000020653	125.352	0.0146833	0.0418765	0.0443199	0.507285	Klf11	None
ENSMUSG00000017679	1382.16	0.0146704	0.037211	0.373536	0.90529	Ttpal	None
ENSMUSG00000014074	820.001	0.0146548	0.0384804	0.325642	0.891392	Rnf168	None
ENSMUSG00000038949	1148.37	0.0146497	0.0385294	0.34721	0.897463	Cnst	None
ENSMUSG00000025007	442.928	0.0146479	0.041075	0.138466	0.732143	Aldh18a1	None
ENSMUSG00000075028	257.749	0.0146369	0.0412509	0.117671	0.69711	Prdm11	None
ENSMUSG00000022679	1456.38	0.0146347	0.0385251	0.321393	0.889662	Mpv17l	None
ENSMUSG00000014361	672.473	0.0146346	0.0400353	0.23002	0.836566	Mertk	None
ENSMUSG00000049421	1722.95	0.0146324	0.0378203	0.347356	0.897463	Zfp260	None
ENSMUSG00000060181	870.174	0.014625	0.0382209	0.335243	0.89528	Slc35e3	None
ENSMUSG00000024231	1326.88	0.0146137	0.0388379	0.31566	0.887527	Cul2	None
ENSMUSG00000075700	3938.26	0.0146007	0.0346398	0.431769	0.927182	Selenot	None
ENSMUSG00000027784	2736.71	0.0145968	0.0369039	0.374922	0.90529	Ppm1l	None
ENSMUSG00000025813	2243.13	0.0145964	0.03728	0.372499	0.904837	Homer2	None
ENSMUSG00000073079	2128.31	0.0145883	0.0382569	0.337505	0.896336	Srp54a	None
ENSMUSG00000027981	1085.54	0.0145815	0.0390838	0.293861	0.877131	Rnpc3	None
ENSMUSG00000028468	1300.08	0.0145691	0.0387927	0.316027	0.887527	Rgp1	None
ENSMUSG00000025736	957.488	0.0145521	0.0385412	0.347564	0.897463	Jmjd8	None
ENSMUSG00000021608	847.167	0.0145453	0.0384512	0.325227	0.891214	Lpcat1	None
ENSMUSG00000025366	228.459	0.0145253	0.0410889	0.129138	0.717418	Esyt1	None
ENSMUSG00000024253	411.626	0.0145067	0.0400219	0.214463	0.821552	Dync2li1	None
ENSMUSG00000041303	773.632	0.0145057	0.0384291	0.329249	0.892572	Gtf3c3	None
ENSMUSG00000060519	199.908	0.0145054	0.0417268	0.0521291	0.54676	Tor3a	None
ENSMUSG00000030541	937.831	0.0145054	0.0383274	0.336226	0.89528	Idh2	None
ENSMUSG00000024477	631.953	0.0144923	0.039653	0.259692	0.854223	Pggt1b	None
ENSMUSG00000025268	960.079	0.0144887	0.0383777	0.329173	0.892572	Maged2	None
ENSMUSG00000038291	1164.82	0.0144813	0.0382479	0.30154	0.883642	Snx25	None
ENSMUSG00000003037	811.718	0.0144788	0.0393135	0.283081	0.869938	Rab8a	None
ENSMUSG00000033530	3625.72	0.0144756	0.0359414	0.40062	0.916082	Ttc7b	None
ENSMUSG00000000568	3249.19	0.0144593	0.0359219	0.423514	0.923095	Hnrnpd	None
ENSMUSG00000070044	463.492	0.0144559	0.0400392	0.229729	0.836566	Fam149a	None
ENSMUSG00000015846	880.104	0.0144432	0.0385018	0.321502	0.889741	Rxra	None
ENSMUSG00000073565	141.706	0.0144384	0.0417234	0.0489856	0.532448	Prr16	None
ENSMUSG00000032262	1292.1	0.014436	0.0375592	0.358137	0.901095	Elovl4	None
ENSMUSG00000059401	846.475	0.0144325	0.0385757	0.318688	0.888168	Mamld1	None
ENSMUSG00000057706	447.995	0.0144219	0.0401406	0.222603	0.827533	Mex3b	None
ENSMUSG00000027977	1011.98	0.0144204	0.0397828	0.24565	0.84743	Ndst3	None
ENSMUSG00000030218	352.542	0.0144202	0.040922	0.144106	0.743436	Mgp	None
ENSMUSG00000052563	152.118	0.0144089	0.0415958	0.0629846	0.579781	D930048N14Rik	None
ENSMUSG00000050390	330.624	0.014407	0.040711	0.168776	0.780182	C77080	None
ENSMUSG00000040037	3466.09	0.0144055	0.0380818	0.30702	0.886263	Negr1	None
ENSMUSG00000042851	468.653	0.0143824	0.0396586	0.264401	0.858805	Zc3h6	None
ENSMUSG00000001435	259.254	0.0143797	0.0418157	0.0238339	0.394971	Col18a1	None
ENSMUSG00000033306	298.019	0.0143797	0.0407105	0.16939	0.780897	Lpp	None
ENSMUSG00000063015	4253.74	0.0143792	0.0353322	0.433138	0.928222	Ccni	None
ENSMUSG00000003528	727.43	0.0143757	0.0393797	0.314339	0.887527	Slc25a1	None
ENSMUSG00000037355	450.354	0.0143732	0.0402087	0.214556	0.821552	Uvssa	None
ENSMUSG00000024240	1023.66	0.0143629	0.0386395	0.315127	0.887527	Epc1	None
ENSMUSG00000035597	1550.39	0.0143595	0.037438	0.369515	0.904228	Prpf39	None
ENSMUSG00000023966	320.467	0.0143459	0.0406025	0.17796	0.79129	Rsph9	None
ENSMUSG00000032497	808.636	0.0143408	0.0386077	0.318484	0.888168	Lrrfip2	None
ENSMUSG00000049553	1185.31	0.0143289	0.0404202	0.193825	0.80537	Polr1a	None
ENSMUSG00000003119	650.598	0.0143267	0.0389833	0.301176	0.883642	Cdk12	None
ENSMUSG00000068036	2586.49	0.0143171	0.0354505	0.415132	0.921962	Afdn	None
ENSMUSG00000020454	1212.2	0.0143007	0.0386899	0.315419	0.887527	Eif4enif1	None
ENSMUSG00000031548	234.525	0.0142916	0.0418831	0.0221927	0.387616	Sfrp1	None
ENSMUSG00000040097	6154.02	0.0142797	0.036327	0.395219	0.912819	Flywch1	None
ENSMUSG00000029752	1574.15	0.0142718	0.0365628	0.39521	0.912819	Asns	None
ENSMUSG00000021763	209.355	0.0142637	0.0418778	0.0201152	0.373071	BC067074	None
ENSMUSG00000021318	253.927	0.0142633	0.0411971	0.107241	0.677414	Gli3	None
ENSMUSG00000004980	10898.3	0.0142499	0.0346019	0.443244	0.932419	Hnrnpa2b1	None
ENSMUSG00000028252	706.245	0.0142458	0.0396061	0.237404	0.843648	Ccnc	None
ENSMUSG00000007850	6181.9	0.014235	0.0344198	0.42744	0.925897	Hnrnph1	None
ENSMUSG00000040488	1696.83	0.0142214	0.0405191	0.181467	0.793474	Ltbp4	None
ENSMUSG00000014329	272.859	0.0142039	0.0408386	0.150459	0.75081	Bicc1	None
ENSMUSG00000027944	823.244	0.0142009	0.0381479	0.341799	0.897446	Hax1	None
ENSMUSG00000032712	297.319	0.0142008	0.0410004	0.12793	0.716122	Resf1	None
ENSMUSG00000013584	239.761	0.0141966	0.0412843	0.0909674	0.643263	Aldh1a2	None
ENSMUSG00000047735	119.031	0.0141599	0.0415419	0.0555067	0.559428	Samd9l	None
ENSMUSG00000037470	1551.8	0.0141468	0.039322	0.277393	0.867732	Uggt1	None
ENSMUSG00000002778	1345.4	0.0141419	0.038594	0.321956	0.890013	Kdelr1	None
ENSMUSG00000042613	1818.4	0.0141275	0.0396991	0.336382	0.89528	Pbxip1	None
ENSMUSG00000028760	6554.98	0.014122	0.0344161	0.351326	0.899566	Eif4g3	None
ENSMUSG00000039230	1146.22	0.0141135	0.0395869	0.261572	0.855801	Tbcd	None
ENSMUSG00000048915	150.755	0.0140954	0.04137	0.0751579	0.606646	Efna5	None
ENSMUSG00000074733	1481.39	0.0140865	0.0385967	0.321087	0.889662	Zfp950	None
ENSMUSG00000013662	2414.38	0.0140768	0.0347732	0.438404	0.930283	Atad1	None
ENSMUSG00000013495	851.161	0.0140716	0.0383286	0.330765	0.892631	Tmem175	None
ENSMUSG00000018661	1332.04	0.0140695	0.0391625	0.292311	0.875862	Cog1	None
ENSMUSG00000036097	1534.22	0.0140632	0.0361202	0.41257	0.920878	Slf2	None
ENSMUSG00000027429	968.816	0.0140612	0.0376952	0.361595	0.90321	Sec23b	None
ENSMUSG00000035824	790.411	0.0140572	0.0393959	0.274766	0.864527	Tk2	None
ENSMUSG00000022309	202.104	0.0140572	0.0410752	0.112738	0.686994	Angpt1	None
ENSMUSG00000040536	1890.85	0.014056	0.0417931	0.0195458	0.366855	Necab1	None
ENSMUSG00000074212	2753	0.0140516	0.0365297	0.398656	0.913708	Dnajb14	None
ENSMUSG00000039585	2880.67	0.0140466	0.0379917	0.351509	0.899566	Myo9a	None
ENSMUSG00000031732	1400.44	0.014035	0.0376248	0.358791	0.901095	Phlpp2	None
ENSMUSG00000027895	1557.97	0.014027	0.0394857	0.268592	0.861387	Kcnc4	None
ENSMUSG00000021939	10576.2	0.0140227	0.0345378	0.484292	0.938153	Ctsb	None
ENSMUSG00000075701	703.724	0.0140041	0.0386097	0.322234	0.890013	Selenos	None
ENSMUSG00000045875	150.722	0.0139951	0.041341	0.0730597	0.60417	Adra1a	None
ENSMUSG00000040383	926.103	0.0139913	0.0386025	0.314581	0.887527	Aqr	None
ENSMUSG00000031754	1904.46	0.013975	0.0370596	0.38359	0.908758	Nudt21	None
ENSMUSG00000039106	311.461	0.0139706	0.0405725	0.173868	0.78683	Htr5a	None
ENSMUSG00000069114	205.876	0.0139693	0.040903	0.130795	0.720363	Zbtb10	None
ENSMUSG00000031134	1884	0.0139637	0.0372799	0.335629	0.89528	Rbmx	None
ENSMUSG00000022967	1020.68	0.0139537	0.0381057	0.35129	0.899566	Ifnar1	None
ENSMUSG00000034780	1117.4	0.0139448	0.0397874	0.244877	0.846811	B3galt1	None
ENSMUSG00000050541	70.8033	0.0139333	0.0417576	0.0168768	0.350419	Adra1b	None
ENSMUSG00000032253	1557.11	0.0139165	0.0367598	0.39746	0.913326	Phip	None
ENSMUSG00000094483	10731.8	0.0139041	0.0348365	0.461198	0.934946	Purb	None
ENSMUSG00000020052	183.474	0.0139017	0.0411752	0.0909299	0.643263	Ascl1	None
ENSMUSG00000061232	621.28	0.0138911	0.0397084	0.251696	0.852461	H2-K1	None
ENSMUSG00000021665	1917.09	0.0138877	0.0356561	0.425796	0.925755	Hexb	None
ENSMUSG00000025189	3123.23	0.0138821	0.0347129	0.447909	0.932419	Cnnm1	None
ENSMUSG00000014077	3047.17	0.0138674	0.0346828	0.375473	0.90529	Chp1	None
ENSMUSG00000027698	2863.04	0.0138461	0.0361678	0.424639	0.924159	Nceh1	None
ENSMUSG00000015176	1542.58	0.0138328	0.0375332	0.372519	0.904837	Nolc1	None
ENSMUSG00000026360	750.262	0.0138287	0.0407201	0.153252	0.756777	Rgs2	None
ENSMUSG00000001472	13135.4	0.013824	0.0340277	0.59816	0.961511	Tcf25	None
ENSMUSG00000005442	3944.55	0.0138182	0.0347508	0.451901	0.932419	Cic	None
ENSMUSG00000022351	1271.33	0.0138146	0.0382489	0.344454	0.897446	Sqle	None
ENSMUSG00000044528	609.22	0.0138117	0.0394318	0.266998	0.86104	Tram1l1	None
ENSMUSG00000029209	542.965	0.0138076	0.039448	0.247103	0.849265	Gnpda2	None
ENSMUSG00000027397	3105.1	0.0138002	0.0365468	0.238053	0.844342	Slc20a1	None
ENSMUSG00000029838	4710.3	0.0137984	0.0384924	0.317765	0.888168	Ptn	None
ENSMUSG00000041073	1031.97	0.013785	0.0395992	0.256679	0.854186	Nacad	None
ENSMUSG00000031246	2417.66	0.0137706	0.0363232	0.419655	0.921962	Sh3bgrl	None
ENSMUSG00000039463	888.32	0.0137693	0.0384179	0.32697	0.892262	Slc9a8	None
ENSMUSG00000001506	278.312	0.0137661	0.0408751	0.126136	0.7131	Col1a1	None
ENSMUSG00000036019	313.64	0.0137642	0.0407222	0.148083	0.74623	Tmtc2	None
ENSMUSG00000024188	3391.12	0.0137499	0.0344152	0.449095	0.932419	Luc7l	None
ENSMUSG00000031951	371.703	0.0137475	0.0401587	0.208095	0.817263	Tmem231	None
ENSMUSG00000027177	2135.21	0.0137408	0.036673	0.405895	0.917935	Hipk3	None
ENSMUSG00000025086	674.324	0.0137399	0.0393434	0.277771	0.867982	Trub1	None
ENSMUSG00000040270	313.874	0.0137397	0.0412029	0.0776073	0.609187	Bach2	None
ENSMUSG00000031274	244.48	0.0137364	0.0412419	0.0717093	0.602119	Col4a5	None
ENSMUSG00000018677	1105.41	0.0137341	0.037468	0.372783	0.904837	Slc25a39	None
ENSMUSG00000041238	105.418	0.0137318	0.0415566	0.0279346	0.423945	Rbbp8	None
ENSMUSG00000034064	1154.31	0.0137269	0.0372494	0.381927	0.908231	Poglut1	None
ENSMUSG00000044548	181.539	0.0137096	0.0410318	0.100508	0.663029	Dact1	None
ENSMUSG00000045215	345.227	0.0137075	0.0403905	0.182878	0.793502	Asxl3	None
ENSMUSG00000007021	3100.17	0.0137048	0.036044	0.429897	0.926899	Syngr3	None
ENSMUSG00000033960	2008.18	0.0137035	0.0365047	0.458663	0.934577	Jcad	None
ENSMUSG00000005621	905.54	0.0137	0.0397006	0.257269	0.854186	Zfp592	None
ENSMUSG00000064341	144736	0.013693	0.0386839	0.33779	0.896403	mt-Nd1	None
ENSMUSG00000032327	317.015	0.0136906	0.0411127	0.0866751	0.632458	Stra6	None
ENSMUSG00000059142	386.084	0.013676	0.040296	0.190019	0.802288	Zfp945	None
ENSMUSG00000062519	829.384	0.0136571	0.0386607	0.334409	0.89518	Zfp398	None
ENSMUSG00000042473	417.242	0.0136379	0.0399028	0.229088	0.836384	Tbc1d8b	None
ENSMUSG00000041624	119.598	0.0136277	0.0412828	0.0592053	0.567001	Gucy1a2	None
ENSMUSG00000043872	260.769	0.0136261	0.0409627	0.105657	0.67326	Zmym1	None
ENSMUSG00000070047	1709.55	0.0136258	0.0399374	0.224607	0.830752	Fat1	None
ENSMUSG00000040407	1865.06	0.0136225	0.0378898	0.354547	0.900617	Akap9	None
ENSMUSG00000041997	2151.95	0.0136204	0.0366169	0.407829	0.919147	Tlk1	None
ENSMUSG00000074925	1328.69	0.0136159	0.0384211	0.332017	0.892978	Ptar1	None
ENSMUSG00000027009	888.972	0.013612	0.0387136	0.319462	0.888625	Itga4	None
ENSMUSG00000053644	1957.47	0.0136022	0.0359433	0.448085	0.932419	Aldh7a1	None
ENSMUSG00000020598	8644.13	0.0136005	0.0351493	0.445513	0.932419	Nrcam	None
ENSMUSG00000036860	374.55	0.0135963	0.0397436	0.245829	0.84743	Mrpl55	None
ENSMUSG00000071266	319.837	0.0135853	0.040047	0.216392	0.823598	Zfp946	None
ENSMUSG00000036578	634.107	0.0135748	0.0397908	0.239746	0.845094	Fxyd7	None
ENSMUSG00000053819	1439.56	0.0135698	0.0416968	0.00641479	0.233357	Camk2d	None
ENSMUSG00000021962	622.97	0.0135673	0.0389924	0.305869	0.885976	Dcp1a	None
ENSMUSG00000040312	90.3351	0.0135593	0.0414894	0.0260707	0.411617	Cchcr1	None
ENSMUSG00000025016	4296.44	0.0135583	0.0338391	0.474674	0.938153	Tm9sf3	None
ENSMUSG00000051098	840.119	0.0135574	0.0393596	0.278101	0.867982	Mblac2	None
ENSMUSG00000015932	4000.81	0.0135546	0.035084	0.457947	0.93403	Dstn	None
ENSMUSG00000041716	508.5	0.0135533	0.0396252	0.254926	0.853742	Gm20604	None
ENSMUSG00000046138	1543.28	0.0135531	0.0365652	0.409159	0.919883	9930021J03Rik	None
ENSMUSG00000059049	387.891	0.0135265	0.0413563	0.0425145	0.504411	Frem1	None
ENSMUSG00000059005	8209.17	0.0135125	0.0356145	0.448601	0.932419	Hnrnpa3	None
ENSMUSG00000032014	227.351	0.0135055	0.040609	0.148027	0.74623	Oaf	None
ENSMUSG00000027452	764.041	0.0134985	0.0393267	0.274782	0.864527	Acss1	None
ENSMUSG00000051451	1797.14	0.0134873	0.0367737	0.38916	0.911383	Crebzf	None
ENSMUSG00000037808	485.343	0.0134868	0.0397237	0.245834	0.84743	Fam76b	None
ENSMUSG00000051579	825.943	0.0134829	0.0395266	0.26147	0.855779	Tceal8	None
ENSMUSG00000039449	1017.74	0.0134793	0.0385116	0.33135	0.892631	Prpf18	None
ENSMUSG00000019920	648.235	0.0134505	0.0391447	0.2969	0.880802	Lims1	None
ENSMUSG00000050812	2740.28	0.0134466	0.0389777	0.309057	0.886263	Ecpas	None
ENSMUSG00000033632	344.168	0.0134394	0.0402415	0.193136	0.80537	AW554918	None
ENSMUSG00000041263	3098.34	0.0134364	0.0359051	0.437361	0.930219	Rusc1	None
ENSMUSG00000004698	891.894	0.0134262	0.0379962	0.359625	0.901095	Hdac9	None
ENSMUSG00000034485	276.789	0.0134223	0.0404317	0.175807	0.790892	Uaca	None
ENSMUSG00000026411	1252.02	0.0134218	0.0378075	0.351317	0.899566	Tmem9	None
ENSMUSG00000002396	366.854	0.0134213	0.0400651	0.210614	0.818525	Ocel1	None
ENSMUSG00000025037	710.006	0.0134192	0.0382982	0.344092	0.897446	Maoa	None
ENSMUSG00000050199	782.25	0.0134121	0.0384596	0.335122	0.89528	Lgr4	None
ENSMUSG00000054252	2489.82	0.0134039	0.0392506	0.36184	0.90321	Fgfr3	None
ENSMUSG00000031533	357.642	0.0134005	0.0399873	0.219431	0.826596	Mrps31	None
ENSMUSG00000052676	499.668	0.0133837	0.0396483	0.249112	0.850158	Zmat1	None
ENSMUSG00000007415	1120.36	0.0133822	0.0382794	0.345739	0.897463	Gatad1	None
ENSMUSG00000020612	14935.7	0.0133791	0.0322875	0.47096	0.936195	Prkar1a	None
ENSMUSG00000055480	119.128	0.0133754	0.0411476	0.0632951	0.579781	Zfp458	None
ENSMUSG00000033610	676.878	0.0133479	0.0387116	0.318732	0.888168	Pank1	None
ENSMUSG00000020154	1066.78	0.0133411	0.0371432	0.397781	0.913708	Ptprb	None
ENSMUSG00000024750	3459.26	0.0133245	0.0345228	0.540241	0.94746	Zfand5	None
ENSMUSG00000054855	190.754	0.0133091	0.0408254	0.109061	0.679358	Rnd1	None
ENSMUSG00000027560	252.54	0.0132918	0.0405593	0.146881	0.746076	Dok5	None
ENSMUSG00000117310	2101.39	0.0132863	0.0359285	0.422654	0.923087	Ptp4a1	None
ENSMUSG00000030016	2475.49	0.0132765	0.0392156	0.285612	0.871167	Zfp638	None
ENSMUSG00000020289	740.914	0.0132718	0.0387213	0.321177	0.889662	Nprl3	None
ENSMUSG00000011658	515.336	0.0132607	0.0396622	0.24825	0.849492	Fuz	None
ENSMUSG00000026924	1951.76	0.0132521	0.0380095	0.34366	0.897446	Sec16a	None
ENSMUSG00000030979	508.935	0.0132454	0.0391277	0.294028	0.877131	Uros	None
ENSMUSG00000038526	408.006	0.0132444	0.041168	0.0519865	0.546503	Car14	None
ENSMUSG00000033805	756.999	0.0132422	0.0384733	0.335788	0.89528	Ephx4	None
ENSMUSG00000032245	257.78	0.0132247	0.0407805	0.112062	0.685688	Cln6	None
ENSMUSG00000028165	1062.93	0.0132235	0.0380071	0.35831	0.901095	Cisd2	None
ENSMUSG00000021338	615.666	0.0131895	0.0392157	0.286195	0.871167	Carmil1	None
ENSMUSG00000039414	1145.99	0.0131875	0.0381638	0.345156	0.897463	Heatr5b	None
ENSMUSG00000024642	1197.87	0.0131866	0.0368562	0.410205	0.91999	Tle4	None
ENSMUSG00000054728	7510.16	0.0131859	0.0328382	0.482976	0.938153	Phactr1	None
ENSMUSG00000030871	191.568	0.0131722	0.0405151	0.147767	0.74623	Ears2	None
ENSMUSG00000034154	836.843	0.0131698	0.0380827	0.356808	0.901095	Ino80	None
ENSMUSG00000034997	308.91	0.0131669	0.0402783	0.183508	0.795442	Htr2a	None
ENSMUSG00000054850	465.361	0.0131385	0.0394825	0.283598	0.869938	Smim10l2a	None
ENSMUSG00000054843	2299.82	0.0131363	0.0362073	0.430574	0.926957	Atrnl1	None
ENSMUSG00000029386	547.254	0.0131282	0.03996	0.226562	0.833047	Tctn2	None
ENSMUSG00000029111	549.266	0.0131185	0.0393918	0.271247	0.862675	Nelfa	None
ENSMUSG00000040459	5037.43	0.0131118	0.0338964	0.473498	0.937865	Arglu1	None
ENSMUSG00000055493	796.828	0.0131101	0.0384022	0.340785	0.897446	Epm2a	None
ENSMUSG00000009470	2010.82	0.0130989	0.037762	0.365232	0.903902	Tnpo1	None
ENSMUSG00000028804	1804.74	0.0130875	0.0382105	0.344426	0.897446	Csmd2	None
ENSMUSG00000024660	282.168	0.0130842	0.0403369	0.168335	0.78008	Incenp	None
ENSMUSG00000046387	325.691	0.0130816	0.0399867	0.212273	0.819633	Pcdhb17	None
ENSMUSG00000028976	93.9756	0.0130684	0.041167	0.0399169	0.493383	Slc2a5	None
ENSMUSG00000102918	2670.68	0.013067	0.0367881	0.415151	0.921962	Pcdhgc3	None
ENSMUSG00000041926	918.973	0.0130642	0.0373163	0.396026	0.912947	Rnpep	None
ENSMUSG00000031202	1247.03	0.0130577	0.0364919	0.430601	0.926957	Rab39b	None
ENSMUSG00000015659	541.806	0.0130521	0.0390548	0.297574	0.880802	Serac1	None
ENSMUSG00000026788	682.495	0.0130457	0.0392518	0.282932	0.869938	Zbtb43	None
ENSMUSG00000031148	964.374	0.013045	0.0380515	0.360256	0.901641	Gpkow	None
ENSMUSG00000052512	1880.39	0.0130446	0.0377555	0.374997	0.90529	Nav2	None
ENSMUSG00000004113	3281.26	0.013043	0.0367066	0.414281	0.921517	Cacna1b	None
ENSMUSG00000047904	216.947	0.0130393	0.040463	0.150037	0.750302	Sstr2	None
ENSMUSG00000029191	995.607	0.0130354	0.0383729	0.333213	0.894391	Rfc1	None
ENSMUSG00000062929	1406.87	0.0130285	0.0366811	0.420176	0.921962	Cfl2	None
ENSMUSG00000026977	1528.28	0.0130209	0.0384604	0.338896	0.897019	March7	None
ENSMUSG00000095687	211.672	0.0130104	0.0411345	0.041316	0.496323	Rnaset2a	None
ENSMUSG00000048720	387.047	0.0130062	0.0395613	0.25432	0.853689	Tbc1d12	None
ENSMUSG00000055900	183.887	0.0129988	0.0405469	0.134793	0.726756	Tmem69	None
ENSMUSG00000022797	2505.32	0.0129838	0.0356499	0.442737	0.932419	Tfrc	None
ENSMUSG00000014786	458.752	0.0129837	0.0398	0.233724	0.840225	Slc9a5	None
ENSMUSG00000033233	203.326	0.0129785	0.0408757	0.0812529	0.620309	Trim45	None
ENSMUSG00000041390	228.827	0.012958	0.041305	0.0150053	0.335016	Mdfic	None
ENSMUSG00000026042	435.036	0.0129551	0.0397368	0.23412	0.840607	Col5a2	None
ENSMUSG00000000751	1460.79	0.012942	0.0363297	0.419985	0.921962	Rpa1	None
ENSMUSG00000024927	478.875	0.0129367	0.0395502	0.255583	0.854186	Rela	None
ENSMUSG00000032258	287.071	0.0129217	0.0407673	0.0958206	0.654157	Lca5	None
ENSMUSG00000030987	1906.07	0.0129103	0.0373979	0.396891	0.912947	Stim1	None
ENSMUSG00000021932	141.443	0.0129055	0.040976	0.0597214	0.567787	Rnaseh2b	None
ENSMUSG00000020802	3318.1	0.0128949	0.0348762	0.466758	0.935753	Ube2o	None
ENSMUSG00000020053	191.797	0.012893	0.0404816	0.139859	0.735023	Igf1	None
ENSMUSG00000028416	1787.59	0.0128896	0.0364291	0.416347	0.921962	Bag1	None
ENSMUSG00000063550	940.839	0.0128884	0.0374725	0.387581	0.909957	Nup98	None
ENSMUSG00000018068	694.706	0.012884	0.0389654	0.309686	0.886263	Ints2	None
ENSMUSG00000029007	284.801	0.0128768	0.0399324	0.215276	0.822276	Agtrap	None
ENSMUSG00000028753	217.905	0.0128751	0.0410854	0.0399695	0.493383	Vwa5b1	None
ENSMUSG00000052062	142.104	0.0128729	0.0408405	0.0772259	0.609187	Pard3b	None
ENSMUSG00000020844	306.317	0.0128721	0.0403395	0.161264	0.765757	Nxn	None
ENSMUSG00000021871	137.684	0.0128658	0.0407981	0.0875675	0.634928	Gm49342	None
ENSMUSG00000005360	14267.6	0.0128616	0.0347497	0.455496	0.932419	Slc1a3	None
ENSMUSG00000050511	216.839	0.012858	0.0404012	0.151493	0.753245	Oprd1	None
ENSMUSG00000021294	214.449	0.0128564	0.0404246	0.146857	0.746076	Kif26a	None
ENSMUSG00000020363	130.28	0.0128456	0.0407713	0.090532	0.643263	Gfpt2	None
ENSMUSG00000037710	1294.04	0.0128398	0.0367955	0.416011	0.921962	Cisd1	None
ENSMUSG00000031189	226.479	0.0128336	0.0405809	0.118824	0.698296	Aff2	None
ENSMUSG00000037722	317.017	0.0128306	0.0399422	0.211394	0.819234	Gnpnat1	None
ENSMUSG00000040420	164.068	0.0127991	0.0406886	0.101664	0.665652	Cdh18	None
ENSMUSG00000040957	291.323	0.0127875	0.0397762	0.229555	0.836566	Cables1	None
ENSMUSG00000039219	1523.3	0.0127644	0.0373884	0.376178	0.90529	Arid4b	None
ENSMUSG00000040152	166.14	0.0127506	0.0408586	0.0685166	0.592271	Thbs1	None
ENSMUSG00000021806	268.954	0.0127482	0.0408831	0.0635003	0.579781	Nid2	None
ENSMUSG00000060591	205.903	0.0127452	0.0404203	0.142354	0.741648	Ifitm2	None
ENSMUSG00000046321	201.358	0.0127444	0.0409401	0.0557	0.560129	Hs3st2	None
ENSMUSG00000074264	664.179	0.0127434	0.0391441	0.294227	0.877182	Amy1	None
ENSMUSG00000033416	341.887	0.0127426	0.0396606	0.241315	0.845356	Gucd1	None
ENSMUSG00000030123	973.552	0.0127369	0.0398795	0.215629	0.822889	Plxnd1	None
ENSMUSG00000001467	1215.91	0.0127249	0.0369601	0.402181	0.916823	Cyp51	None
ENSMUSG00000021303	643.602	0.0127198	0.0406717	0.100047	0.662085	Gng4	None
ENSMUSG00000031209	193.082	0.0127104	0.0406315	0.107558	0.678433	Heph	None
ENSMUSG00000058258	1075.93	0.0126997	0.0379585	0.367305	0.903902	Idi1	None
ENSMUSG00000020590	2089.26	0.0126974	0.0357725	0.463419	0.935275	Snx13	None
ENSMUSG00000021482	265.502	0.0126888	0.0398927	0.213898	0.820669	Prxl2c	None
ENSMUSG00000027568	124.237	0.0126806	0.0408509	0.0658093	0.586658	Ntsr1	None
ENSMUSG00000042359	2027.65	0.0126765	0.0351615	0.466049	0.935433	Osbpl6	None
ENSMUSG00000023235	247.447	0.012675	0.0401592	0.177577	0.79129	Ccl25	None
ENSMUSG00000028246	920.837	0.0126705	0.0379916	0.369072	0.903902	Faxc	None
ENSMUSG00000049176	2460.62	0.012663	0.036572	0.41948	0.921962	Frmpd4	None
ENSMUSG00000025420	160.978	0.0126593	0.0404418	0.134802	0.726756	Katnal2	None
ENSMUSG00000040463	1475.96	0.0126479	0.0371466	0.407879	0.919147	Mybbp1a	None
ENSMUSG00000061755	2085.01	0.0126431	0.0362444	0.437862	0.930219	Bod1l	None
ENSMUSG00000046404	392.924	0.0126358	0.0394168	0.266121	0.859464	Yod1	None
ENSMUSG00000030029	708.286	0.0126336	0.0397409	0.233341	0.840153	Lrig1	None
ENSMUSG00000036356	354.268	0.0126324	0.0394241	0.259026	0.854223	Csgalnact1	None
ENSMUSG00000103144	236.578	0.0126269	0.0403017	0.154689	0.758115	Pcdhga1	None
ENSMUSG00000030352	1222.77	0.012623	0.0389175	0.309855	0.886263	Tspan9	None
ENSMUSG00000074165	799.584	0.0126144	0.0382517	0.357415	0.901095	Zfp788	None
ENSMUSG00000028434	1007.08	0.0126089	0.037809	0.378866	0.907304	Epb41l4b	None
ENSMUSG00000031174	413.186	0.0126066	0.0391439	0.310044	0.886263	Rpgr	None
ENSMUSG00000072941	249.107	0.0125999	0.0406108	0.100293	0.662644	Sod3	None
ENSMUSG00000033542	159.335	0.0125992	0.0409174	0.0486503	0.531255	Arhgef5	None
ENSMUSG00000010067	265.082	0.0125983	0.039843	0.219004	0.826596	Rassf1	None
ENSMUSG00000029772	6262.52	0.0125957	0.0368735	0.391576	0.912548	Ahcyl2	None
ENSMUSG00000063450	945.745	0.0125953	0.0378466	0.377407	0.906414	Syne2	None
ENSMUSG00000044221	1753.96	0.0125941	0.036196	0.441091	0.931553	Grsf1	None
ENSMUSG00000028339	209.706	0.0125879	0.0410682	0.0237573	0.394971	Col15a1	None
ENSMUSG00000049265	228.439	0.0125818	0.0403445	0.146704	0.746076	Kcnk3	None
ENSMUSG00000051768	653.008	0.0125652	0.0386744	0.327157	0.892262	Xrcc1	None
ENSMUSG00000028517	5867.26	0.0125575	0.0354711	0.465768	0.935433	Plpp3	None
ENSMUSG00000048029	111.798	0.0125504	0.0408711	0.0530582	0.55059	Eno4	None
ENSMUSG00000013089	1760.96	0.0125408	0.0355167	0.469125	0.936195	Etv5	None
ENSMUSG00000025423	1071.41	0.012536	0.0368791	0.392158	0.912548	Pias2	None
ENSMUSG00000031767	115.327	0.0125267	0.040846	0.0560425	0.562593	Nudt7	None
ENSMUSG00000033793	2929.02	0.0125234	0.0352827	0.467418	0.935753	Atp6v1h	None
ENSMUSG00000023965	954.487	0.0125211	0.038453	0.34385	0.897446	Fbxl17	None
ENSMUSG00000034640	409.419	0.0125201	0.0392637	0.273357	0.863616	Tiparp	None
ENSMUSG00000023079	534.702	0.0125046	0.0399976	0.1947	0.805843	Gtf2ird1	None
ENSMUSG00000068284	1948.2	0.0125011	0.0379311	0.385272	0.909442	Usf3	None
ENSMUSG00000029253	511.849	0.0124943	0.0388335	0.312843	0.886693	Cenpc1	None
ENSMUSG00000024150	1393.11	0.0124919	0.0371302	0.402231	0.916823	Mcfd2	None
ENSMUSG00000038683	875.728	0.0124914	0.0375728	0.386324	0.909957	Pak1ip1	None
ENSMUSG00000041608	209.343	0.0124832	0.0401843	0.16697	0.77732	Entpd3	None
ENSMUSG00000036941	935.866	0.0124741	0.0373647	0.401088	0.916523	Elac1	None
ENSMUSG00000033411	517.059	0.012463	0.0396353	0.239292	0.844653	Ctdspl2	None
ENSMUSG00000109946	574.086	0.0124525	0.0387483	0.321564	0.889741	Brd3os	None
ENSMUSG00000049583	6533.87	0.0124465	0.0319187	0.669486	0.969489	Grm5	None
ENSMUSG00000028637	417.433	0.0124426	0.04002	0.189485	0.802288	Ccdc30	None
ENSMUSG00000021680	405.785	0.0124388	0.0399851	0.194516	0.805525	Crhbp	None
ENSMUSG00000020456	5460.38	0.0124238	0.0348363	0.484978	0.938197	Ogdh	None
ENSMUSG00000010936	609.562	0.0124098	0.0380941	0.369244	0.903902	Vac14	None
ENSMUSG00000074994	576.792	0.0124096	0.0386741	0.294094	0.877131	Qser1	None
ENSMUSG00000040520	820.91	0.0123984	0.0376511	0.384856	0.909281	Manea	None
ENSMUSG00000021098	222.329	0.0123981	0.040223	0.15769	0.760657	4930447C04Rik	None
ENSMUSG00000062937	237.118	0.0123929	0.0400629	0.177358	0.79129	Mtap	None
ENSMUSG00000047907	1233.75	0.0123888	0.0411063	0.00865985	0.255453	Tshz2	None
ENSMUSG00000022863	446.667	0.0123812	0.0393612	0.303583	0.885179	Btg3	None
ENSMUSG00000034021	2952.78	0.0123567	0.0366544	0.418945	0.921962	Pds5b	None
ENSMUSG00000014932	329.871	0.0123531	0.0397447	0.224025	0.829809	Yes1	None
ENSMUSG00000039488	98.6193	0.0123513	0.0408708	0.0304633	0.440623	Cntn5	None
ENSMUSG00000021891	403.12	0.0123371	0.039413	0.262074	0.856471	Mettl6	None
ENSMUSG00000036103	313.01	0.0123368	0.0399019	0.206247	0.815828	Colec12	None
ENSMUSG00000041075	353.986	0.0123261	0.0400205	0.18572	0.797281	Fzd7	None
ENSMUSG00000028337	599.904	0.012316	0.0392233	0.282558	0.869938	Coro2a	None
ENSMUSG00000028986	2123.11	0.0123089	0.0362824	0.463033	0.935072	Klhl7	None
ENSMUSG00000029513	297.282	0.0123085	0.0400933	0.164668	0.771556	Prkab1	None
ENSMUSG00000036339	746.056	0.0123084	0.0378288	0.384006	0.908758	Tmem260	None
ENSMUSG00000033063	204.485	0.0123076	0.0408804	0.0344689	0.466738	Cntnap3	None
ENSMUSG00000044033	606.198	0.0123072	0.0395699	0.244426	0.84646	Ccdc141	None
ENSMUSG00000022704	530.587	0.0123034	0.0396933	0.231542	0.838364	Qtrt2	None
ENSMUSG00000038112	187.981	0.0123025	0.0408208	0.0443351	0.507285	AW551984	None
ENSMUSG00000031446	1637.68	0.0122959	0.0369396	0.423087	0.923087	Cul4a	None
ENSMUSG00000063434	1068.2	0.0122881	0.0374425	0.404219	0.917935	Sorcs3	None
ENSMUSG00000024487	1088.65	0.0122832	0.0385394	0.338751	0.897019	Yipf5	None
ENSMUSG00000001288	224.026	0.0122776	0.0400336	0.18183	0.793474	Rarg	None
ENSMUSG00000047514	3930.06	0.0122723	0.0330612	0.508823	0.944636	Tspyl1	None
ENSMUSG00000041351	4636.09	0.0122626	0.0352053	0.524261	0.946295	Rap1gap	None
ENSMUSG00000012640	773.504	0.0122574	0.0379578	0.376057	0.90529	Zfp715	None
ENSMUSG00000021371	783.166	0.0122538	0.037849	0.379335	0.907304	Mcur1	None
ENSMUSG00000021983	1361.53	0.0122533	0.0383594	0.34985	0.899076	Atp8a2	None
ENSMUSG00000021112	1025.43	0.0122451	0.0370779	0.415403	0.921962	Mpp5	None
ENSMUSG00000024008	529.27	0.0122377	0.0389206	0.308961	0.886263	Cpne5	None
ENSMUSG00000070564	115.495	0.012231	0.0406692	0.0672945	0.589402	Ntn5	None
ENSMUSG00000032816	1545.88	0.0122303	0.0357725	0.460543	0.934914	Igdcc4	None
ENSMUSG00000051236	185.928	0.0122292	0.0402365	0.147287	0.74623	Msrb3	None
ENSMUSG00000026014	1436.49	0.012225	0.039081	0.294601	0.877829	Raph1	None
ENSMUSG00000036197	458.459	0.0122238	0.0391932	0.283934	0.869938	Gxylt1	None
ENSMUSG00000023885	180.626	0.0122232	0.0401146	0.168397	0.780087	Thbs2	None
ENSMUSG00000019823	262.258	0.0122185	0.040299	0.138049	0.731801	Mical1	None
ENSMUSG00000010755	780.986	0.0122162	0.0393094	0.275823	0.865511	Cars	None
ENSMUSG00000059824	1109.41	0.0122022	0.0393263	0.261738	0.855801	Dbp	None
ENSMUSG00000029056	843.057	0.0122018	0.0375339	0.3941	0.912548	Pank4	None
ENSMUSG00000050211	204.289	0.0122017	0.0405428	0.0897281	0.640384	Pla2g4e	None
ENSMUSG00000035401	1662.41	0.0121889	0.0370193	0.425267	0.92522	Emsy	None
ENSMUSG00000038914	2187.88	0.0121889	0.0357993	0.463674	0.935325	Dido1	None
ENSMUSG00000054752	919.033	0.0121835	0.0384936	0.341052	0.897446	Fsd1l	None
ENSMUSG00000029093	1537.83	0.0121781	0.0359564	0.457159	0.933587	Sorcs2	None
ENSMUSG00000043467	786.511	0.0121736	0.0386608	0.263636	0.858805	Zbtb37	None
ENSMUSG00000032609	607.641	0.0121727	0.0399007	0.248111	0.849492	Klhdc8b	None
ENSMUSG00000048148	2475.36	0.0121698	0.0381218	0.368953	0.903902	Nwd1	None
ENSMUSG00000007613	730.769	0.0121695	0.0383625	0.350701	0.899566	Tgfbr1	None
ENSMUSG00000005142	1140.68	0.0121659	0.0369725	0.423752	0.923271	Man2b1	None
ENSMUSG00000061603	5159.97	0.012161	0.0348811	0.481773	0.938153	Akap6	None
ENSMUSG00000049300	388.283	0.0121606	0.0391638	0.296827	0.880802	Prmt6	None
ENSMUSG00000064202	117.837	0.0121506	0.040487	0.0970527	0.655242	4430402I18Rik	None
ENSMUSG00000023845	2494.19	0.0121504	0.0373845	0.398296	0.913708	Lnpep	None
ENSMUSG00000029283	575.164	0.0121503	0.0386466	0.330502	0.892572	Cdc7	None
ENSMUSG00000038126	775.23	0.0121435	0.0382315	0.360162	0.901576	Mphosph9	None
ENSMUSG00000019889	1575.36	0.0121434	0.0370649	0.417172	0.921962	Ptprk	None
ENSMUSG00000029545	166.631	0.0121225	0.0402384	0.14282	0.741981	Acads	None
ENSMUSG00000032252	571.928	0.0121216	0.038411	0.350257	0.899076	Glce	None
ENSMUSG00000042810	1668.04	0.0121115	0.0364821	0.450069	0.932419	Krba1	None
ENSMUSG00000061479	1167.04	0.0121081	0.0383722	0.351466	0.899566	Snrpa	None
ENSMUSG00000068551	461.302	0.0120943	0.0393298	0.268197	0.861368	Zfp467	None
ENSMUSG00000029049	140.428	0.0120856	0.0405362	0.0828755	0.622108	Morn1	None
ENSMUSG00000056673	809.743	0.0120797	0.0385694	0.326859	0.892262	Kdm5d	None
ENSMUSG00000032998	1793.57	0.0120695	0.0358885	0.461797	0.934946	Foxj3	None
ENSMUSG00000053334	309.313	0.0120685	0.0394767	0.251487	0.852319	Ficd	None
ENSMUSG00000021194	2609.27	0.0120662	0.0369041	0.4261	0.925897	Chga	None
ENSMUSG00000092074	204.673	0.0120598	0.0401502	0.151684	0.753245	Dynlt1a	None
ENSMUSG00000039253	866.615	0.012054	0.0370577	0.417723	0.921962	Fn3krp	None
ENSMUSG00000047261	3107.82	0.0120537	0.0405116	0.147529	0.74623	Gap43	None
ENSMUSG00000035840	275.133	0.012052	0.0397079	0.208662	0.817263	Lysmd3	None
ENSMUSG00000072235	24249.4	0.0120411	0.0346057	0.570957	0.955018	Tuba1a	None
ENSMUSG00000024298	2896.09	0.01203	0.0370252	0.400095	0.915526	Zfp871	None
ENSMUSG00000005686	507.703	0.0120209	0.0388686	0.332384	0.893492	Ampd3	None
ENSMUSG00000036632	372.418	0.0120202	0.0391015	0.288516	0.872483	Alg5	None
ENSMUSG00000047141	599.252	0.0120181	0.0381867	0.366033	0.903902	Zfp654	None
ENSMUSG00000050029	791.185	0.0120176	0.0380133	0.376137	0.90529	Rap2c	None
ENSMUSG00000041506	412.876	0.0120138	0.0397883	0.208962	0.817263	Rrp9	None
ENSMUSG00000030092	188.728	0.0120075	0.0404333	0.0978608	0.656092	Cntn6	None
ENSMUSG00000042115	205.713	0.012006	0.0404661	0.0905073	0.643263	Klhdc8a	None
ENSMUSG00000026035	283.771	0.0120022	0.039586	0.237092	0.843648	Ppil3	None
ENSMUSG00000025921	361.117	0.012002	0.0390739	0.295547	0.878715	Rdh10	None
ENSMUSG00000026721	4319.24	0.011984	0.0342877	0.497046	0.939512	Rabgap1l	None
ENSMUSG00000026600	914.52	0.0119823	0.0398002	0.207886	0.817263	Soat1	None
ENSMUSG00000038070	357.748	0.0119815	0.0398135	0.203944	0.813869	Cntln	None
ENSMUSG00000050538	906.849	0.0119775	0.0372654	0.412092	0.920878	B230217C12Rik	None
ENSMUSG00000030729	10380	0.0119632	0.0337486	0.516732	0.946295	Pgm2l1	None
ENSMUSG00000036882	2938.94	0.0119588	0.0361357	0.440393	0.931553	Arhgap33	None
ENSMUSG00000038368	1443.24	0.0119505	0.0362086	0.455356	0.932419	Focad	None
ENSMUSG00000028158	320.465	0.0119485	0.039502	0.24638	0.848417	Mttp	None
ENSMUSG00000005610	13123	0.0119476	0.0336976	0.410193	0.91999	Eif4g2	None
ENSMUSG00000035529	773.088	0.0119444	0.0386637	0.271155	0.862675	Prdm4	None
ENSMUSG00000020329	722.573	0.0119418	0.0387215	0.327003	0.892262	Polrmt	None
ENSMUSG00000002365	390.551	0.0119374	0.0389074	0.308237	0.886263	Snx9	None
ENSMUSG00000032908	263.133	0.0119361	0.0398996	0.189767	0.802288	Sgpp2	None
ENSMUSG00000020432	612.786	0.0119271	0.0403468	0.105228	0.672529	Tcn2	None
ENSMUSG00000034075	1382.07	0.0119266	0.0362083	0.455572	0.932419	Zdhhc5	None
ENSMUSG00000024501	1503.02	0.011918	0.0357929	0.469034	0.936195	Dpysl3	None
ENSMUSG00000024647	170.995	0.0119138	0.0407227	0.033875	0.462582	Cbln2	None
ENSMUSG00000005674	1262.51	0.011912	0.0370135	0.425126	0.925066	Tomm40l	None
ENSMUSG00000035566	2124.28	0.0119083	0.0352538	0.482437	0.938153	Pcdh17	None
ENSMUSG00000030942	1171.79	0.0119049	0.0364096	0.451555	0.932419	Thumpd1	None
ENSMUSG00000025188	644.165	0.0119046	0.0382937	0.358801	0.901095	Hps1	None
ENSMUSG00000028780	545.108	0.0118915	0.0388967	0.31057	0.886263	Sema3c	None
ENSMUSG00000042790	1496.01	0.0118827	0.0361791	0.458887	0.934596	Rnf214	None
ENSMUSG00000035521	1201.03	0.0118794	0.0364499	0.455156	0.932419	Gnptg	None
ENSMUSG00000022272	1361.45	0.0118706	0.0379269	0.383115	0.908758	Myo10	None
ENSMUSG00000028657	2284.25	0.0118682	0.0348282	0.491648	0.938583	Ppt1	None
ENSMUSG00000025103	3043	0.0118519	0.0380837	0.375461	0.90529	Btbd1	None
ENSMUSG00000036501	1421.15	0.0118486	0.0358517	0.469119	0.936195	Fam13b	None
ENSMUSG00000027227	431.665	0.0118428	0.038908	0.310542	0.886263	Sord	None
ENSMUSG00000028189	169.295	0.0118405	0.0401092	0.146042	0.74586	Ctbs	None
ENSMUSG00000002731	334.323	0.0118338	0.039708	0.215963	0.823598	Prkra	None
ENSMUSG00000006021	416.4	0.0118199	0.038754	0.350019	0.899076	Kptn	None
ENSMUSG00000039701	496.466	0.011819	0.0392338	0.276264	0.866235	Usp53	None
ENSMUSG00000029098	838.608	0.0118138	0.0371463	0.420617	0.922467	Acox3	None
ENSMUSG00000014551	701.477	0.0118119	0.038892	0.322664	0.890013	Mrps25	None
ENSMUSG00000019872	761.364	0.0118058	0.0383898	0.340728	0.897446	Smpdl3a	None
ENSMUSG00000050043	3792.52	0.0118051	0.0336511	0.515301	0.946295	Tmx2	None
ENSMUSG00000039307	892.411	0.0117925	0.0378224	0.386712	0.909957	Hexdc	None
ENSMUSG00000086316	296.397	0.011792	0.039374	0.248936	0.850158	Nbdy	None
ENSMUSG00000048004	163.297	0.0117907	0.0401335	0.142868	0.741981	Tmem196	None
ENSMUSG00000047473	319.97	0.011781	0.0394033	0.255557	0.854186	Zfp30	None
ENSMUSG00000048001	175.605	0.0117773	0.0400243	0.162274	0.768043	Hes5	None
ENSMUSG00000043903	107.233	0.0117747	0.0405727	0.0518132	0.54531	Zfp469	None
ENSMUSG00000031349	475.866	0.0117741	0.0392008	0.278756	0.867982	Nsdhl	None
ENSMUSG00000026511	1591.9	0.0117685	0.0377641	0.765546	0.980007	Srp9	None
ENSMUSG00000034361	1125.17	0.0117652	0.039562	0.237539	0.843648	Cpne2	None
ENSMUSG00000049550	3523.77	0.0117532	0.0350868	0.375525	0.90529	Clip1	None
ENSMUSG00000052613	504.701	0.011751	0.0399341	0.176521	0.79129	Pcdh15	None
ENSMUSG00000019027	277.542	0.0117494	0.0398858	0.184516	0.795659	Dnah1	None
ENSMUSG00000046561	85.8735	0.0117491	0.0405385	0.0572871	0.564755	Arsj	None
ENSMUSG00000048280	890.444	0.0117261	0.0384156	0.295333	0.878581	Zfp738	None
ENSMUSG00000052033	339.885	0.011725	0.0391654	0.268718	0.861387	Pfdn4	None
ENSMUSG00000019979	529.124	0.011715	0.0399334	0.17561	0.790748	Apaf1	None
ENSMUSG00000022427	1120.54	0.0116897	0.0371725	0.422586	0.923087	Tomm22	None
ENSMUSG00000040857	950.011	0.0116891	0.0382781	0.387857	0.909957	Erf	None
ENSMUSG00000023192	1205.44	0.0116671	0.0373469	0.412121	0.920878	Grm2	None
ENSMUSG00000032376	593.765	0.0116664	0.0392319	0.274997	0.8649	Usp3	None
ENSMUSG00000040451	780.787	0.011665	0.0391532	0.287874	0.872009	Sgms1	None
ENSMUSG00000018995	288.284	0.0116582	0.0403614	0.087847	0.634928	Nars2	None
ENSMUSG00000078161	594.435	0.0116533	0.0379733	0.382071	0.908231	Erich3	None
ENSMUSG00000032528	625.657	0.0116524	0.0391109	0.287892	0.872009	Vipr1	None
ENSMUSG00000005262	1570.26	0.0116491	0.0358673	0.475051	0.938153	Ufd1	None
ENSMUSG00000038181	1690.34	0.0116468	0.0357128	0.4797	0.938153	Chpf2	None
ENSMUSG00000010095	2412.71	0.0116406	0.0353113	0.498492	0.939573	Slc3a2	None
ENSMUSG00000045659	720.475	0.0116368	0.0391978	0.278972	0.867982	Plekha7	None
ENSMUSG00000023150	2616.68	0.0116273	0.034152	0.510616	0.945964	Ivns1abp	None
ENSMUSG00000041797	253.087	0.0116248	0.0396948	0.211406	0.819234	Abca9	None
ENSMUSG00000027650	508.322	0.0116203	0.0388313	0.322317	0.890013	Tti1	None
ENSMUSG00000036099	1713.11	0.0116185	0.0371709	0.430398	0.926957	Vezt	None
ENSMUSG00000022048	2949.85	0.0116035	0.0347257	0.502203	0.9411	Dpysl2	None
ENSMUSG00000078307	3385.1	0.011598	0.0349148	0.498623	0.939573	AI593442	None
ENSMUSG00000025464	209.697	0.0115928	0.0400229	0.153924	0.757573	Paox	None
ENSMUSG00000009995	1096.26	0.0115872	0.0382479	0.366111	0.903902	Taz	None
ENSMUSG00000042632	479.191	0.0115839	0.0384528	0.348172	0.898026	Pla2g6	None
ENSMUSG00000026643	2194.86	0.01158	0.0350881	0.495136	0.939069	Nmt2	None
ENSMUSG00000030754	1467.91	0.011578	0.0358308	0.470121	0.936195	Copb1	None
ENSMUSG00000024781	559.827	0.0115733	0.0389014	0.320403	0.889252	Lipa	None
ENSMUSG00000038879	161.489	0.0115715	0.0400168	0.153387	0.756777	Nipal2	None
ENSMUSG00000048264	2402.18	0.0115687	0.0352879	0.491158	0.938583	Dip2c	None
ENSMUSG00000025280	735.41	0.0115628	0.0380955	0.376541	0.905665	Polr3a	None
ENSMUSG00000073805	158.88	0.0115612	0.0399577	0.165403	0.773337	Insyn2a	None
ENSMUSG00000037426	1440.58	0.0115516	0.0371643	0.413481	0.921336	Depdc5	None
ENSMUSG00000017756	218.249	0.0115486	0.040144	0.126436	0.714081	Slc12a7	None
ENSMUSG00000039137	808.898	0.0115422	0.0397292	0.205417	0.815312	Whrn	None
ENSMUSG00000060935	547.291	0.01154	0.0384041	0.346238	0.897463	Tmem263	None
ENSMUSG00000068264	241.894	0.0115351	0.0397496	0.202234	0.813347	Ap5s1	None
ENSMUSG00000016487	704.619	0.0115342	0.0380729	0.384282	0.908897	Ppfibp1	None
ENSMUSG00000031376	4935.44	0.0115296	0.0377876	0.513193	0.946295	Atp2b3	None
ENSMUSG00000000759	1178.4	0.0115216	0.0370512	0.411356	0.920618	Tubgcp3	None
ENSMUSG00000045210	1833.5	0.0115163	0.0356895	0.482016	0.938153	Vcpip1	None
ENSMUSG00000038859	96.251	0.0115118	0.0406691	0.0146591	0.33245	Baiap2l1	None
ENSMUSG00000058594	1448.26	0.0115096	0.0381095	0.379286	0.907304	Fbh1	None
ENSMUSG00000019789	120.882	0.0115056	0.0401968	0.112777	0.686994	Hey2	None
ENSMUSG00000032449	1977.87	0.011499	0.0364347	0.437917	0.930219	Slc25a36	None
ENSMUSG00000034845	184.435	0.0114967	0.0400353	0.14519	0.745714	Plvap	None
ENSMUSG00000038605	326.559	0.0114906	0.039504	0.2371	0.843648	Samd10	None
ENSMUSG00000024457	524.785	0.0114905	0.0384652	0.335423	0.89528	Trim26	None
ENSMUSG00000096255	307.344	0.0114711	0.0395256	0.23274	0.839934	Dynlt1b	None
ENSMUSG00000027201	2234.62	0.0114662	0.0347433	0.506356	0.942882	Myef2	None
ENSMUSG00000034813	722.324	0.0114655	0.0386058	0.340281	0.897446	Grip1	None
ENSMUSG00000054405	1529.4	0.0114634	0.0373596	0.418288	0.921962	Dnajc8	None
ENSMUSG00000025743	5249.93	0.0114555	0.0358437	0.518197	0.946295	Sdc3	None
ENSMUSG00000030393	338.293	0.0114445	0.0388831	0.305262	0.885976	Zik1	None
ENSMUSG00000090093	271.698	0.0114415	0.0395899	0.221966	0.827486	Gm14399	None
ENSMUSG00000029298	104.033	0.0114314	0.0402555	0.0941483	0.652484	Gbp9	None
ENSMUSG00000047747	2114.06	0.0114046	0.0366848	0.431063	0.92704	Rnf150	None
ENSMUSG00000020988	427.163	0.0114012	0.0389691	0.30286	0.884536	L2hgdh	None
ENSMUSG00000015354	245.601	0.0113902	0.0403959	0.0600844	0.569582	Pcolce2	None
ENSMUSG00000035413	307.472	0.0113876	0.040026	0.145691	0.745714	Tmem98	None
ENSMUSG00000020770	618.728	0.0113862	0.0383513	0.359343	0.901095	Unk	None
ENSMUSG00000021461	173.383	0.0113744	0.0398904	0.169199	0.780897	Fancc	None
ENSMUSG00000043372	136.656	0.0113735	0.0402636	0.0881167	0.635044	Hexim2	None
ENSMUSG00000070544	2021.85	0.0113709	0.0348595	0.507428	0.943139	Top1	None
ENSMUSG00000103793	431.383	0.0113551	0.0394588	0.239676	0.845094	Pcdhga6	None
ENSMUSG00000006930	5291.02	0.0113532	0.0388371	0.325169	0.891214	Hap1	None
ENSMUSG00000022124	1932.13	0.011353	0.0352646	0.502141	0.9411	Fbxl3	None
ENSMUSG00000026840	184.009	0.0113516	0.0398371	0.176552	0.79129	Lamc3	None
ENSMUSG00000027297	549.897	0.0113463	0.039093	0.287815	0.872009	Ltk	None
ENSMUSG00000021326	499.819	0.0113459	0.0381406	0.37477	0.90529	Trim27	None
ENSMUSG00000032667	940.971	0.0113322	0.03817	0.39032	0.911919	Pon2	None
ENSMUSG00000031434	132.356	0.0113309	0.0401197	0.117976	0.69711	Morc4	None
ENSMUSG00000020462	1822.96	0.0113279	0.0361949	0.460203	0.934739	Cfap36	None
ENSMUSG00000048007	315.484	0.0113256	0.0389967	0.300643	0.883642	Timm8a1	None
ENSMUSG00000026102	778.621	0.0113223	0.0387511	0.330897	0.892631	Inpp1	None
ENSMUSG00000046449	1461.52	0.0113204	0.0359965	0.480091	0.938153	Nexmif	None
ENSMUSG00000036112	1936.18	0.0113109	0.0354405	0.500063	0.940081	Metap2	None
ENSMUSG00000036009	110.918	0.0113097	0.0401781	0.10348	0.669874	Mettl25	None
ENSMUSG00000007207	2021.2	0.0112983	0.0357028	0.488745	0.938583	Stx1a	None
ENSMUSG00000036898	662.856	0.0112962	0.0378723	0.372368	0.904837	Zfp157	None
ENSMUSG00000022240	4480.29	0.0112861	0.0360896	0.477106	0.938153	Ctnnd2	None
ENSMUSG00000037826	1337.24	0.0112847	0.037256	0.433535	0.928379	Ppm1k	None
ENSMUSG00000039556	424.913	0.0112819	0.0391383	0.279132	0.867982	Ppp1r3f	None
ENSMUSG00000058145	267.755	0.0112803	0.0393344	0.244123	0.846324	Adamts17	None
ENSMUSG00000032026	1181.1	0.0112797	0.0367322	0.452755	0.932419	Rexo2	None
ENSMUSG00000020377	101.746	0.0112522	0.0405172	0.0234913	0.394971	Ltc4s	None
ENSMUSG00000044807	1232.32	0.0112511	0.0368041	0.452417	0.932419	Zfp354c	None
ENSMUSG00000035293	444.742	0.0112482	0.0385891	0.34086	0.897446	G2e3	None
ENSMUSG00000032373	1901.73	0.0112463	0.0403893	0.056477	0.563537	Car12	None
ENSMUSG00000039199	821.976	0.0112331	0.037137	0.436987	0.930219	Zdhhc1	None
ENSMUSG00000003731	2890.2	0.0112309	0.0336755	0.535656	0.946295	Kpna6	None
ENSMUSG00000018377	837.966	0.0112273	0.037875	0.392942	0.912548	Vezf1	None
ENSMUSG00000021185	130.637	0.0112168	0.0402604	0.0766986	0.609187	Dglucy	None
ENSMUSG00000024308	578.108	0.0112167	0.0382464	0.372337	0.904837	Tapbp	None
ENSMUSG00000062991	121.096	0.0112047	0.0403902	0.0458223	0.512787	Nrg1	None
ENSMUSG00000054871	751.444	0.0111915	0.0382903	0.363552	0.903795	Tmem158	None
ENSMUSG00000015243	1359.01	0.0111867	0.0381043	0.401966	0.916823	Abca1	None
ENSMUSG00000022141	1445.8	0.0111834	0.0364814	0.464666	0.935325	Nipbl	None
ENSMUSG00000053646	3113.96	0.0111818	0.0350581	0.504021	0.941504	Plxnb1	None
ENSMUSG00000018593	6122.45	0.0111765	0.0350907	0.367276	0.903902	Sparc	None
ENSMUSG00000027204	487.291	0.011176	0.0392976	0.25938	0.854223	Fbn1	None
ENSMUSG00000044712	353.892	0.0111756	0.0392397	0.283131	0.869938	Slc38a6	None
ENSMUSG00000020817	2941.1	0.0111732	0.0362022	0.47539	0.938153	Rabep1	None
ENSMUSG00000021973	504.77	0.011166	0.0383245	0.360969	0.902229	Micu2	None
ENSMUSG00000035969	2704.09	0.0111651	0.036624	0.466046	0.935433	Rusc2	None
ENSMUSG00000022092	410.056	0.011154	0.0385167	0.347002	0.897463	Ppp3cc	None
ENSMUSG00000026347	220.06	0.0111524	0.0400869	0.112607	0.686994	Tmem163	None
ENSMUSG00000030469	434.443	0.0111511	0.0384276	0.354669	0.900754	Zfp719	None
ENSMUSG00000021613	640.452	0.0111478	0.0393792	0.248237	0.849492	Hapln1	None
ENSMUSG00000032314	631.597	0.0111455	0.0377036	0.512574	0.946295	Etfa	None
ENSMUSG00000040021	1025.81	0.0111455	0.0369769	0.448334	0.932419	Lats1	None
ENSMUSG00000031297	142.583	0.0111393	0.0404635	0.025298	0.406071	Slc7a3	None
ENSMUSG00000020273	516.225	0.0111292	0.0383262	0.366529	0.903902	Papolg	None
[truncated: 10,563 more rows]
