# Supplementary material for: Peripheral substance P induces deficits in hippocampal synaptic plasticity and memory
Source: Mol Brain. 2025 Aug 16;18:69. doi: 10.1186/s13041-025-01242-6 (PMC12358064; doi:10.1186/s13041-025-01242-6)
Supplement: Supplementary file 2 — Supplementary Material 2: Gene Ontology pathway of up-regulated DEGs [file 13041_2025_1242_MOESM2_ESM.xlsx]

## Sheet: UP_GO_BP
ID	Description	GeneRatio	BgRatio	pvalue	p.adjust	qvalue	geneID	Count
GO:0001934	positive regulation of protein phosphorylation	12/48	774/28564	4.09972e-09	4.36621e-06	2.65403e-06	Bmp3/Ccn2/Drd1/Adcyap1/Pdgfd/Lepr/Cd44/Bmp7/Bmp6/Reln/Mef2c/Erbb4	12
GO:0042327	positive regulation of phosphorylation	12/48	847/28564	1.1169e-08	5.80589e-06	3.52915e-06	Bmp3/Ccn2/Drd1/Adcyap1/Pdgfd/Lepr/Cd44/Bmp7/Bmp6/Reln/Mef2c/Erbb4	12
GO:0050795	regulation of behavior	6/48	107/28564	2.58953e-08	5.80589e-06	3.52915e-06	Drd1/Lepr/Cckbr/Reln/Htr1b/Mef2c	6
GO:0010562	positive regulation of phosphorus metabolic process	12/48	929/28564	3.09186e-08	5.80589e-06	3.52915e-06	Bmp3/Ccn2/Drd1/Adcyap1/Pdgfd/Lepr/Cd44/Bmp7/Bmp6/Reln/Mef2c/Erbb4	12
GO:0045937	positive regulation of phosphate metabolic process	12/48	929/28564	3.09186e-08	5.80589e-06	3.52915e-06	Bmp3/Ccn2/Drd1/Adcyap1/Pdgfd/Lepr/Cd44/Bmp7/Bmp6/Reln/Mef2c/Erbb4	12
GO:0090066	regulation of anatomical structure size	10/48	574/28564	3.27092e-08	5.80589e-06	3.52915e-06	Vill/Drd1/Adcyap1/Sema3a/Prkg2/Arhgap18/Fhod3/Npr3/Htr1b/Dcx	10
GO:0061448	connective tissue development	8/48	307/28564	4.22307e-08	5.81169e-06	3.53268e-06	Rxfp1/Bmp3/Ccn2/Pdgfd/Bmp7/Prkg2/Bmp6/Mef2c	8
GO:0033555	multicellular organismal response to stress	6/48	119/28564	4.89746e-08	5.81169e-06	3.53268e-06	Drd1/Adcyap1/Cckbr/Reln/Mef2c/Nr4a2	6
GO:0001764	neuron migration	7/48	204/28564	4.91129e-08	5.81169e-06	3.53268e-06	Drd1/Sema3a/Reln/Mdga2/Mef2c/Dcx/Nr4a2	7
GO:0035249	synaptic transmission, glutamatergic	6/48	127/28564	7.2224e-08	7.69186e-06	4.67555e-06	Drd1/Adcyap1/Cckbr/Reln/Htr1b/Mef2c	6
GO:0071363	cellular response to growth factor stimulus	10/48	676/28564	1.49925e-07	1.45155e-05	8.82334e-06	Bmp3/Vwc2l/Ccn2/Pdgfd/Cd44/Bmp7/Tet1/Bmp6/Mef2c/Erbb4	10
GO:0070848	response to growth factor	10/48	691/28564	1.83578e-07	1.62926e-05	9.90356e-06	Bmp3/Vwc2l/Ccn2/Pdgfd/Cd44/Bmp7/Tet1/Bmp6/Mef2c/Erbb4	10
GO:0001568	blood vessel development	10/48	770/28564	4.9511e-07	3.94839e-05	2.40006e-05	Ccn2/Pdgfd/Lepr/Erap1/Klf5/Bmp7/Plxdc1/Npr3/Mef2c/Chm	10
GO:0120035	regulation of plasma membrane bounded cell projection organization	10/48	774/28564	5.19038e-07	3.94839e-05	2.40006e-05	Adcyap1/Sema3a/Cd44/Klf5/Bmp7/Cobl/Reln/Fnbp1l/Dcx/Fut9	10
GO:0045597	positive regulation of cell differentiation	11/48	988/28564	5.6073e-07	3.98119e-05	2.41999e-05	Vwc2l/Ccn2/Klf5/Bmp7/Piezo1/Prkg2/Bmp6/Olfm2/Reln/Mef2c/Dcx	11
GO:0031344	regulation of cell projection organization	10/48	788/28564	6.10973e-07	4.06679e-05	2.47203e-05	Adcyap1/Sema3a/Cd44/Klf5/Bmp7/Cobl/Reln/Fnbp1l/Dcx/Fut9	10
GO:0007610	behavior	10/48	798/28564	6.85105e-07	4.29198e-05	2.60891e-05	Drd1/Adcyap1/Lepr/Cckbr/Chrna4/Olfm2/Reln/Htr1b/Mef2c/Nr4a2	10
GO:0001944	vasculature development	10/48	804/28564	7.33272e-07	4.33852e-05	2.63721e-05	Ccn2/Pdgfd/Lepr/Erap1/Klf5/Bmp7/Plxdc1/Npr3/Mef2c/Chm	10
GO:0016358	dendrite development	7/48	327/28564	1.1896e-06	6.66803e-05	4.05321e-05	Sema3a/Bmp7/Cobl/Tet1/Reln/Mef2c/Dcx	7
GO:0044057	regulation of system process	9/48	670/28564	1.50903e-06	8.01511e-05	4.87204e-05	Ccn2/Drd1/Sema3a/Cckbr/Chrna4/Bmp6/Reln/Mef2c/Ctsc	9
GO:0007416	synapse assembly	6/48	216/28564	1.64222e-06	8.01511e-05	4.87204e-05	Cbln4/Lgi2/Reln/Mdga2/Mef2c/Erbb4	6
GO:0032989	cellular component morphogenesis	10/48	880/28564	1.6557e-06	8.01511e-05	4.87204e-05	Sema3a/Cd44/Bmp7/Cobl/Tet1/Fhod3/Reln/Mef2c/Dcx/Nr4a2	10
GO:0051216	cartilage development	6/48	219/28564	1.77889e-06	8.23701e-05	5.00693e-05	Bmp3/Ccn2/Bmp7/Prkg2/Bmp6/Mef2c	6
GO:0008015	blood circulation	8/48	538/28564	2.92575e-06	0.00012983	7.89181e-05	Ccn2/Drd1/Adcyap1/Sema3a/Erap1/Bmp6/Npr3/Htr1b	8
GO:0032940	secretion by cell	10/48	955/28564	3.43365e-06	0.000135775	8.25317e-05	Ccn2/Cbln4/Adcyap1/Lepr/Cckbr/Chrna4/Bmp6/Olfm2/Htr1b/Mef2c	10
GO:0120039	plasma membrane bounded cell projection morphogenesis	9/48	741/28564	3.43739e-06	0.000135775	8.25317e-05	Sema3a/Cd44/Bmp7/Cobl/Tet1/Reln/Mef2c/Dcx/Nr4a2	9
GO:0050808	synapse organization	8/48	550/28564	3.44218e-06	0.000135775	8.25317e-05	Drd1/Cbln4/Sema3a/Lgi2/Reln/Mdga2/Mef2c/Erbb4	8
GO:0035239	tube morphogenesis	10/48	963/28564	3.69714e-06	0.000136251	8.28214e-05	Ccn2/Lepr/Cd44/Erap1/Klf5/Bmp7/Cobl/Plxdc1/Npr3/Mef2c	10
GO:0048858	cell projection morphogenesis	9/48	748/28564	3.71013e-06	0.000136251	8.28214e-05	Sema3a/Cd44/Bmp7/Cobl/Tet1/Reln/Mef2c/Dcx/Nr4a2	9
GO:0001501	skeletal system development	8/48	568/28564	4.3612e-06	0.000154823	9.41102e-05	Bmp3/Ccn2/Lepr/Bmp7/Prkg2/Bmp6/Npr3/Mef2c	8
GO:0003013	circulatory system process	8/48	571/28564	4.533e-06	0.00015573	9.46619e-05	Ccn2/Drd1/Adcyap1/Sema3a/Erap1/Bmp6/Npr3/Htr1b	8
GO:0032990	cell part morphogenesis	9/48	772/28564	4.79168e-06	0.000159473	9.6937e-05	Sema3a/Cd44/Bmp7/Cobl/Tet1/Reln/Mef2c/Dcx/Nr4a2	9
GO:0007626	locomotory behavior	6/48	270/28564	5.93486e-06	0.000191534	0.000116426	Drd1/Lepr/Chrna4/Olfm2/Reln/Nr4a2	6
GO:0000165	MAPK cascade	9/48	813/28564	7.27045e-06	0.000227736	0.000138431	Ccn2/Adcyap1/Pdgfd/Lepr/Cd44/Cckbr/Bmp7/Mef2c/Erbb4	9
GO:0072006	nephron development	5/48	162/28564	7.75517e-06	0.000235979	0.000143442	Pdgfd/Cd44/Bmp7/Mef2c/Erbb4	5
GO:0034330	cell junction organization	9/48	832/28564	8.74981e-06	0.000258848	0.000157343	Drd1/Cbln4/Sema3a/Bmp6/Lgi2/Reln/Mdga2/Mef2c/Erbb4	9
GO:0048015	phosphatidylinositol-mediated signaling	5/48	171/28564	1.00817e-05	0.000290188	0.000176393	Pdgfd/Plch1/Reln/Npr3/Erbb4	5
GO:0048017	inositol lipid-mediated signaling	5/48	174/28564	1.09675e-05	0.000300825	0.000182859	Pdgfd/Plch1/Reln/Npr3/Erbb4	5
GO:0031346	positive regulation of cell projection organization	7/48	459/28564	1.10161e-05	0.000300825	0.000182859	Adcyap1/Bmp7/Cobl/Reln/Fnbp1l/Dcx/Fut9	7
GO:0048667	cell morphogenesis involved in neuron differentiation	8/48	671/28564	1.46448e-05	0.000389917	0.000237014	Sema3a/Bmp7/Cobl/Tet1/Reln/Mef2c/Dcx/Nr4a2	8
GO:0048732	gland development	7/48	483/28564	1.5304e-05	0.000397531	0.000241642	Rxfp1/Sema3a/Cd44/Cckbr/Bmp7/Cobl/Erbb4	7
GO:0007389	pattern specification process	7/48	492/28564	1.72323e-05	0.000436962	0.000265611	Sema3a/Bmp7/Cobl/Reln/Mdga2/Mef2c/Erbb4	7
GO:0048871	multicellular organismal-level homeostasis	9/48	910/28564	1.7847e-05	0.000442024	0.000268688	Ccn2/Drd1/Adcyap1/Lepr/Cd44/Bmp6/Npr3/Mef2c/Erbb4	9
GO:0007409	axonogenesis	7/48	498/28564	1.86263e-05	0.000450842	0.000274048	Sema3a/Bmp7/Cobl/Reln/Mef2c/Dcx/Nr4a2	7
GO:0001822	kidney development	6/48	336/28564	2.05057e-05	0.000485301	0.000294994	Pdgfd/Cd44/Bmp7/Bmp6/Mef2c/Erbb4	6
GO:0021954	central nervous system neuron development	4/48	100/28564	2.44447e-05	0.00055393	0.000336711	Drd1/Sema3a/Dcx/Nr4a2	4
GO:0048812	neuron projection morphogenesis	8/48	726/28564	2.57467e-05	0.00055393	0.000336711	Sema3a/Bmp7/Cobl/Tet1/Reln/Mef2c/Dcx/Nr4a2	8
GO:0014033	neural crest cell differentiation	4/48	102/28564	2.64265e-05	0.00055393	0.000336711	Sema3a/Bmp7/Mef2c/Erbb4	4
GO:0050804	modulation of chemical synaptic transmission	8/48	729/28564	2.65141e-05	0.00055393	0.000336711	Drd1/Adcyap1/Cckbr/Chrna4/Reln/Htr1b/Mef2c/Erbb4	8
GO:0072001	renal system development	6/48	352/28564	2.66202e-05	0.00055393	0.000336711	Pdgfd/Cd44/Bmp7/Bmp6/Mef2c/Erbb4	6
GO:0099177	regulation of trans-synaptic signaling	8/48	730/28564	2.67742e-05	0.00055393	0.000336711	Drd1/Adcyap1/Cckbr/Chrna4/Reln/Htr1b/Mef2c/Erbb4	8
GO:0070371	ERK1 and ERK2 cascade	6/48	353/28564	2.70463e-05	0.00055393	0.000336711	Ccn2/Adcyap1/Pdgfd/Cd44/Cckbr/Erbb4	6
GO:0043410	positive regulation of MAPK cascade	7/48	534/28564	2.90942e-05	0.000584629	0.000355371	Ccn2/Adcyap1/Pdgfd/Lepr/Cd44/Mef2c/Erbb4	7
GO:0043408	regulation of MAPK cascade	8/48	743/28564	3.0355e-05	0.000598667	0.000363905	Ccn2/Adcyap1/Pdgfd/Lepr/Cd44/Bmp7/Mef2c/Erbb4	8
GO:0061564	axon development	7/48	548/28564	3.42957e-05	0.000659017	0.000400589	Sema3a/Bmp7/Cobl/Reln/Mef2c/Dcx/Nr4a2	7
GO:0000904	cell morphogenesis involved in differentiation	8/48	757/28564	3.46525e-05	0.000659017	0.000400589	Sema3a/Bmp7/Cobl/Tet1/Reln/Mef2c/Dcx/Nr4a2	8
GO:0007167	enzyme-linked receptor protein signaling pathway	9/48	998/28564	3.68199e-05	0.000687951	0.000418176	Bmp3/Vwc2l/Ccn2/Pdgfd/Bmp7/Tet1/Bmp6/Efs/Erbb4	9
GO:0007188	adenylate cyclase-modulating G protein-coupled receptor signaling pathway	5/48	225/28564	3.76922e-05	0.000692107	0.000420703	Rxfp1/Drd1/Adcyap1/Npr3/Htr1b	5
GO:0021761	limbic system development	4/48	113/28564	3.95019e-05	0.000712584	0.00043315	Drd1/Sema3a/Reln/Dcx	4
GO:0070374	positive regulation of ERK1 and ERK2 cascade	5/48	228/28564	4.01456e-05	0.000712584	0.00043315	Ccn2/Adcyap1/Pdgfd/Cd44/Erbb4	5
GO:0045666	positive regulation of neuron differentiation	4/48	117/28564	4.52601e-05	0.000790197	0.000480327	Vwc2l/Bmp7/Bmp6/Mef2c	4
GO:0010976	positive regulation of neuron projection development	5/48	237/28564	4.82546e-05	0.00082889	0.000503847	Adcyap1/Bmp7/Cobl/Reln/Fut9	5
GO:0010975	regulation of neuron projection development	7/48	580/28564	4.91061e-05	0.000830127	0.000504599	Adcyap1/Sema3a/Bmp7/Cobl/Reln/Dcx/Fut9	7
GO:0002062	chondrocyte differentiation	4/48	120/28564	4.99646e-05	0.000831443	0.000505399	Ccn2/Prkg2/Bmp6/Mef2c	4
GO:0003018	vascular process in circulatory system	5/48	240/28564	5.12215e-05	0.000839245	0.000510142	Drd1/Adcyap1/Bmp6/Npr3/Htr1b	5
GO:0045664	regulation of neuron differentiation	5/48	244/28564	5.53948e-05	0.00089387	0.000543346	Vwc2l/Bmp7/Bmp6/Reln/Mef2c	5
GO:0032535	regulation of cellular component size	6/48	404/28564	5.72974e-05	0.000910772	0.00055362	Vill/Sema3a/Prkg2/Arhgap18/Fhod3/Dcx	6
GO:0030029	actin filament-based process	8/48	816/28564	5.88004e-05	0.000920917	0.000559787	Vill/Ccn2/Cobl/Arhgap18/Fhod3/Efs/Fnbp1l/Mef2c	8
GO:0023061	signal release	7/48	607/28564	6.53648e-05	0.00100889	0.000613263	Adcyap1/Lepr/Cckbr/Chrna4/Bmp6/Htr1b/Mef2c	7
GO:0030900	forebrain development	6/48	416/28564	6.73435e-05	0.00102458	0.000622801	Drd1/Sema3a/Reln/Dcx/Nr4a2/Erbb4	6
GO:0060078	regulation of postsynaptic membrane potential	4/48	132/28564	7.24162e-05	0.00108624	0.000660282	Adcyap1/Chrna4/Reln/Mef2c	4
GO:0050730	regulation of peptidyl-tyrosine phosphorylation	5/48	270/28564	8.93147e-05	0.00132111	0.000803049	Pdgfd/Cd44/Bmp6/Reln/Erbb4	5
GO:0033002	muscle cell proliferation	5/48	273/28564	9.40727e-05	0.00135388	0.000822969	Pdgfd/Npr3/Htr1b/Mef2c/Erbb4	5
GO:0090092	regulation of transmembrane receptor protein serine/threonine kinase signaling pathway	5/48	273/28564	9.40727e-05	0.00135388	0.000822969	Bmp3/Vwc2l/Bmp7/Tet1/Bmp6	5
GO:0021537	telencephalon development	5/48	274/28564	9.57013e-05	0.00135896	0.000826053	Drd1/Sema3a/Reln/Dcx/Erbb4	5
GO:0007015	actin filament organization	6/48	454/28564	0.000108781	0.00152437	0.0009266	Vill/Ccn2/Cobl/Arhgap18/Fhod3/Efs	6
GO:0010469	regulation of signaling receptor activity	4/48	149/28564	0.000115744	0.00159732	0.000970946	Gsg1l/Chrna4/Reln/Mef2c	4
GO:0048863	stem cell differentiation	5/48	286/28564	0.000116987	0.00159732	0.000970946	Sema3a/Bmp7/A2m/Mef2c/Erbb4	5
GO:0043086	negative regulation of catalytic activity	7/48	680/28564	0.000132472	0.00178586	0.00108555	Drd1/Adcyap1/Lepr/Cd44/Bmp7/A2m/Npr3	7
GO:0007268	chemical synaptic transmission	8/48	924/28564	0.000139265	0.00182678	0.00111042	Drd1/Adcyap1/Cckbr/Chrna4/Reln/Htr1b/Mef2c/Erbb4	8
GO:0098916	anterograde trans-synaptic signaling	8/48	924/28564	0.000139265	0.00182678	0.00111042	Drd1/Adcyap1/Cckbr/Chrna4/Reln/Htr1b/Mef2c/Erbb4	8
GO:0022612	gland morphogenesis	4/48	157/28564	0.000141576	0.00182678	0.00111042	Rxfp1/Sema3a/Cd44/Bmp7	4
GO:0034329	cell junction assembly	6/48	477/28564	0.000142369	0.00182678	0.00111042	Cbln4/Lgi2/Reln/Mdga2/Mef2c/Erbb4	6
GO:0099537	trans-synaptic signaling	8/48	932/28564	0.000147748	0.00187324	0.00113866	Drd1/Adcyap1/Cckbr/Chrna4/Reln/Htr1b/Mef2c/Erbb4	8
GO:1903530	regulation of secretion by cell	7/48	701/28564	0.000159756	0.00199016	0.00120973	Adcyap1/Lepr/Cckbr/Chrna4/Bmp6/Htr1b/Mef2c	7
GO:0042391	regulation of membrane potential	6/48	488/28564	0.000161102	0.00199016	0.00120973	Drd1/Adcyap1/Piezo1/Chrna4/Reln/Mef2c	6
GO:0007420	brain development	7/48	703/28564	0.000162576	0.00199016	0.00120973	Drd1/Sema3a/Bmp7/Reln/Dcx/Nr4a2/Erbb4	7
GO:0043549	regulation of kinase activity	7/48	711/28564	0.000174265	0.00208877	0.00126968	Drd1/Adcyap1/Pdgfd/Bmp7/Reln/Mef2c/Erbb4	7
GO:0022603	regulation of anatomical structure morphogenesis	8/48	955/28564	0.000174555	0.00208877	0.00126968	Sema3a/Cd44/Erap1/Bmp7/Arhgap18/Reln/Mef2c/Dcx	8
GO:0030041	actin filament polymerization	4/48	167/28564	0.000179444	0.00212342	0.00129074	Vill/Cobl/Arhgap18/Fhod3	4
GO:0022407	regulation of cell-cell adhesion	6/48	503/28564	0.000189743	0.00222062	0.00134982	Cd44/Bmp7/Piezo1/Bmp6/Mdga2/Fut9	6
GO:0099536	synaptic signaling	8/48	975/28564	0.00020102	0.00232703	0.0014145	Drd1/Adcyap1/Cckbr/Chrna4/Reln/Htr1b/Mef2c/Erbb4	8
GO:0030036	actin cytoskeleton organization	7/48	731/28564	0.000206495	0.0023647	0.0014374	Vill/Ccn2/Cobl/Arhgap18/Fhod3/Efs/Mef2c	7
GO:0018108	peptidyl-tyrosine phosphorylation	5/48	326/28564	0.00021504	0.00243636	0.00148096	Pdgfd/Cd44/Bmp6/Reln/Erbb4	5
GO:0018212	peptidyl-tyrosine modification	5/48	328/28564	0.000221205	0.00246309	0.00149721	Pdgfd/Cd44/Bmp6/Reln/Erbb4	5
GO:0048608	reproductive structure development	5/48	329/28564	0.000224337	0.00246309	0.00149721	Adcyap1/Sema3a/Cd44/Bmp7/Bmp6	5
GO:0070372	regulation of ERK1 and ERK2 cascade	5/48	329/28564	0.000224337	0.00246309	0.00149721	Ccn2/Adcyap1/Pdgfd/Cd44/Erbb4	5
GO:0035296	regulation of tube diameter	4/48	179/28564	0.000233956	0.0025168	0.00152986	Drd1/Adcyap1/Npr3/Htr1b	4
GO:0097746	blood vessel diameter maintenance	4/48	179/28564	0.000233956	0.0025168	0.00152986	Drd1/Adcyap1/Npr3/Htr1b	4
GO:0061458	reproductive system development	5/48	333/28564	0.000237207	0.00251993	0.00153176	Adcyap1/Sema3a/Cd44/Bmp7/Bmp6	5
GO:0035150	regulation of tube size	4/48	180/28564	0.000238979	0.00251993	0.00153176	Drd1/Adcyap1/Npr3/Htr1b	4
GO:0030509	BMP signaling pathway	4/48	181/28564	0.00024408	0.00254848	0.00154912	Bmp3/Vwc2l/Bmp7/Bmp6	4
GO:0050806	positive regulation of synaptic transmission	5/48	341/28564	0.000264629	0.00273621	0.00166323	Drd1/Adcyap1/Cckbr/Reln/Erbb4	5
GO:0060322	head development	7/48	764/28564	0.000270116	0.00276609	0.00168139	Drd1/Sema3a/Bmp7/Reln/Dcx/Nr4a2/Erbb4	7
GO:0001659	temperature homeostasis	4/48	192/28564	0.000305487	0.00298938	0.00181712	Drd1/Adcyap1/Lepr/Npr3	4
GO:0048660	regulation of smooth muscle cell proliferation	4/48	192/28564	0.000305487	0.00298938	0.00181712	Pdgfd/Npr3/Htr1b/Mef2c	4
GO:0048813	dendrite morphogenesis	4/48	192/28564	0.000305487	0.00298938	0.00181712	Sema3a/Tet1/Reln/Dcx	4
GO:0050731	positive regulation of peptidyl-tyrosine phosphorylation	4/48	192/28564	0.000305487	0.00298938	0.00181712	Cd44/Bmp6/Reln/Erbb4	4
GO:0046887	positive regulation of hormone secretion	4/48	193/28564	0.00031157	0.00298938	0.00181712	Adcyap1/Lepr/Cckbr/Bmp6	4
GO:0071772	response to BMP	4/48	193/28564	0.00031157	0.00298938	0.00181712	Bmp3/Vwc2l/Bmp7/Bmp6	4
GO:0071773	cellular response to BMP stimulus	4/48	193/28564	0.00031157	0.00298938	0.00181712	Bmp3/Vwc2l/Bmp7/Bmp6	4
GO:0001525	angiogenesis	6/48	555/28564	0.00032153	0.00305741	0.00185847	Ccn2/Lepr/Erap1/Klf5/Plxdc1/Npr3	6
GO:0008154	actin polymerization or depolymerization	4/48	197/28564	0.000336772	0.003174	0.00192934	Vill/Cobl/Arhgap18/Fhod3	4
GO:0032956	regulation of actin cytoskeleton organization	5/48	362/28564	0.000348125	0.00322937	0.00196299	Vill/Ccn2/Arhgap18/Fhod3/Mef2c	5
GO:0051046	regulation of secretion	7/48	797/28564	0.000348711	0.00322937	0.00196299	Adcyap1/Lepr/Cckbr/Chrna4/Bmp6/Htr1b/Mef2c	7
GO:0048659	smooth muscle cell proliferation	4/48	200/28564	0.000356609	0.00324969	0.00197535	Pdgfd/Npr3/Htr1b/Mef2c	4
GO:0050890	cognition	5/48	364/28564	0.000357009	0.00324969	0.00197535	Drd1/Chrna4/Reln/Mef2c/Nr4a2	5
GO:0031644	regulation of nervous system process	4/48	204/28564	0.000384343	0.00346886	0.00210857	Cckbr/Chrna4/Reln/Ctsc	4
GO:0097435	supramolecular fiber organization	7/48	818/28564	0.000407645	0.00364825	0.00221762	Vill/Ccn2/Cobl/Arhgap18/Fhod3/Efs/Mef2c	7
GO:0051960	regulation of nervous system development	6/48	582/28564	0.000413756	0.00367209	0.00223211	Adcyap1/Sema3a/Bmp7/Reln/Dcx/Ctsc	6
GO:0042063	gliogenesis	5/48	378/28564	0.000424098	0.00373276	0.00226899	Drd1/Adcyap1/Lepr/Reln/Dcx	5
GO:0002009	morphogenesis of an epithelium	6/48	589/28564	0.000440752	0.00378932	0.00230337	Sema3a/Cd44/Bmp7/Cobl/Mef2c/Erbb4	6
GO:0030335	positive regulation of cell migration	6/48	589/28564	0.000440752	0.00378932	0.00230337	Drd1/Pdgfd/Sema3a/Bmp7/Reln/Erbb4	6
GO:0048771	tissue remodeling	4/48	212/28564	0.000444392	0.00378932	0.00230337	Lepr/Npr3/Htr1b/Mef2c	4
GO:0048589	developmental growth	7/48	830/28564	0.000444756	0.00378932	0.00230337	Sema3a/Lepr/Klf5/Cobl/Mef2c/Dcx/Erbb4	7
GO:0021953	central nervous system neuron differentiation	4/48	213/28564	0.000452341	0.00382336	0.00232406	Drd1/Sema3a/Dcx/Nr4a2	4
GO:0051338	regulation of transferase activity	7/48	839/28564	0.000474328	0.00397764	0.00241784	Drd1/Adcyap1/Pdgfd/Bmp7/Reln/Mef2c/Erbb4	7
GO:1902903	regulation of supramolecular fiber organization	5/48	394/28564	0.000511991	0.00425993	0.00258943	Vill/Ccn2/Arhgap18/Fhod3/Mef2c	5
GO:0001649	osteoblast differentiation	4/48	224/28564	0.000546621	0.00449432	0.0027319	Bmp3/Bmp7/Bmp6/Mef2c	4
GO:0045859	regulation of protein kinase activity	6/48	614/28564	0.000548602	0.00449432	0.0027319	Drd1/Adcyap1/Pdgfd/Bmp7/Reln/Mef2c	6
GO:2000147	positive regulation of cell motility	6/48	616/28564	0.000558045	0.00453678	0.00275772	Drd1/Pdgfd/Sema3a/Bmp7/Reln/Erbb4	6
GO:0007178	transmembrane receptor protein serine/threonine kinase signaling pathway	5/48	409/28564	0.000606253	0.00489136	0.00297325	Bmp3/Vwc2l/Bmp7/Tet1/Bmp6	5
GO:0032970	regulation of actin filament-based process	5/48	411/28564	0.000619743	0.00496261	0.00301656	Vill/Ccn2/Arhgap18/Fhod3/Mef2c	5
GO:0040017	positive regulation of locomotion	6/48	633/28564	0.000643535	0.00511466	0.00310899	Drd1/Pdgfd/Sema3a/Bmp7/Reln/Erbb4	6
GO:0043269	regulation of monoatomic ion transport	6/48	635/28564	0.000654226	0.00516112	0.00313723	Drd1/Adcyap1/Prkg2/Chrna4/Reln/Htr1b	6
GO:0034762	regulation of transmembrane transport	6/48	636/28564	0.000659624	0.00516544	0.00313985	Drd1/Gsg1l/Chrna4/Reln/Mef2c/Erbb4	6
GO:0060395	SMAD protein signal transduction	3/48	102/28564	0.000680375	0.00528905	0.00321499	Bmp3/Bmp7/Bmp6	3
GO:0001503	ossification	5/48	427/28564	0.00073595	0.00567961	0.0034524	Bmp3/Ccn2/Bmp7/Bmp6/Mef2c	5
GO:0060993	kidney morphogenesis	3/48	107/28564	0.000781901	0.00594803	0.00361556	Cd44/Bmp7/Erbb4	3
GO:0070167	regulation of biomineral tissue development	3/48	107/28564	0.000781901	0.00594803	0.00361556	Bmp7/Bmp6/Mef2c	3
GO:0014066	regulation of phosphatidylinositol 3-kinase signaling	3/48	108/28564	0.000803296	0.00606745	0.00368815	Pdgfd/Reln/Erbb4	3
GO:0048762	mesenchymal cell differentiation	4/48	249/28564	0.00081163	0.00608722	0.00370016	Sema3a/Bmp7/Mef2c/Erbb4	4
GO:0033674	positive regulation of kinase activity	5/48	440/28564	0.000841808	0.00626941	0.00381091	Adcyap1/Pdgfd/Reln/Mef2c/Erbb4	5
GO:0048514	blood vessel morphogenesis	6/48	668/28564	0.000851453	0.00629721	0.00382781	Ccn2/Lepr/Erap1/Klf5/Plxdc1/Npr3	6
GO:0007411	axon guidance	4/48	253/28564	0.000861153	0.00632502	0.00384471	Sema3a/Bmp7/Reln/Mef2c	4
GO:0097485	neuron projection guidance	4/48	254/28564	0.00087386	0.00637439	0.00387472	Sema3a/Bmp7/Reln/Mef2c	4
GO:0007200	phospholipase C-activating G protein-coupled receptor signaling pathway	3/48	112/28564	0.000892593	0.00646674	0.00393086	Drd1/Cckbr/Npr3	3
GO:0015844	monoamine transport	3/48	113/28564	0.000915859	0.00659047	0.00400607	Drd1/Chrna4/Htr1b	3
GO:0099565	chemical synaptic transmission, postsynaptic	3/48	116/28564	0.000987958	0.00706158	0.00429243	Chrna4/Reln/Mef2c	3
GO:0048705	skeletal system morphogenesis	4/48	264/28564	0.00100831	0.00715898	0.00435164	Ccn2/Bmp7/Bmp6/Mef2c	4
GO:0042692	muscle cell differentiation	5/48	460/28564	0.00102638	0.00723905	0.00440031	Klf5/Piezo1/Fhod3/Olfm2/Mef2c	5
GO:0048729	tissue morphogenesis	6/48	700/28564	0.00108391	0.00753486	0.00458012	Sema3a/Cd44/Bmp7/Cobl/Mef2c/Erbb4	6
GO:0060284	regulation of cell development	7/48	966/28564	0.00108687	0.00753486	0.00458012	Adcyap1/Sema3a/Cd44/Bmp7/Reln/Mef2c/Dcx	7
GO:0090100	positive regulation of transmembrane receptor protein serine/threonine kinase signaling pathway	3/48	120/28564	0.00108955	0.00753486	0.00458012	Bmp3/Bmp7/Bmp6	3
GO:0006898	receptor-mediated endocytosis	4/48	273/28564	0.00114121	0.00784124	0.00476636	Cd44/Gsg1l/Htr1b/Fnbp1l	4
GO:0071417	cellular response to organonitrogen compound	6/48	708/28564	0.00114902	0.00784424	0.00476818	Drd1/Pdgfd/Chrna4/Htr1b/Mef2c/Nr4a2	6
GO:0048738	cardiac muscle tissue development	4/48	276/28564	0.00118812	0.00805956	0.00489907	Bmp7/Fhod3/Mef2c/Erbb4	4
GO:0050767	regulation of neurogenesis	5/48	480/28564	0.00123955	0.00833864	0.00506871	Adcyap1/Sema3a/Bmp7/Reln/Dcx	5
GO:0007417	central nervous system development	7/48	989/28564	0.00124532	0.00833864	0.00506871	Drd1/Sema3a/Bmp7/Reln/Dcx/Nr4a2/Erbb4	7
GO:0110053	regulation of actin filament organization	4/48	280/28564	0.00125275	0.00833864	0.00506871	Vill/Ccn2/Arhgap18/Fhod3	4
GO:0051258	protein polymerization	4/48	281/28564	0.00126929	0.00839622	0.00510371	Vill/Cobl/Arhgap18/Fhod3	4
GO:0018958	phenol-containing compound metabolic process	3/48	130/28564	0.00137176	0.0089627	0.00544805	Drd1/Reln/Nr4a2	3
GO:0048565	digestive tract development	3/48	130/28564	0.00137176	0.0089627	0.00544805	Klf5/Cckbr/Cobl	3
GO:0032412	regulation of monoatomic ion transmembrane transporter activity	4/48	290/28564	0.00142505	0.00925415	0.00562521	Gsg1l/Chrna4/Reln/Mef2c	4
GO:0007631	feeding behavior	3/48	133/28564	0.00146454	0.00945293	0.00574603	Drd1/Lepr/Htr1b	3
GO:0030282	bone mineralization	3/48	134/28564	0.00149632	0.00959988	0.00583536	Bmp7/Bmp6/Mef2c	3
GO:0008285	negative regulation of cell population proliferation	6/48	747/28564	0.00151062	0.00963357	0.00585584	Adcyap1/Cd44/Bmp7/Npr3/Mef2c/Erbb4	6
GO:0060537	muscle tissue development	5/48	503/28564	0.00152345	0.00965758	0.00587043	Klf5/Bmp7/Fhod3/Mef2c/Erbb4	5
GO:0014706	striated muscle tissue development	4/48	296/28564	0.00153603	0.00965805	0.00587072	Bmp7/Fhod3/Mef2c/Erbb4	4
GO:1901699	cellular response to nitrogen compound	6/48	750/28564	0.00154166	0.00965805	0.00587072	Drd1/Pdgfd/Chrna4/Htr1b/Mef2c/Nr4a2	6
GO:0051129	negative regulation of cellular component organization	6/48	757/28564	0.001616	0.0100645	0.0061178	Vill/Sema3a/Bmp7/Tet1/Fhod3/Bmp6	6
GO:0022898	regulation of transmembrane transporter activity	4/48	303/28564	0.00167296	0.0103588	0.00629665	Gsg1l/Chrna4/Reln/Mef2c	4
GO:0014065	phosphatidylinositol 3-kinase signaling	3/48	140/28564	0.00169612	0.0104414	0.0063469	Pdgfd/Reln/Erbb4	3
GO:0015850	organic hydroxy compound transport	4/48	306/28564	0.00173417	0.0105788	0.00643043	Drd1/Chrna4/Bmp6/Htr1b	4
GO:0031347	regulation of defense response	6/48	768/28564	0.00173831	0.0105788	0.00643043	Adcyap1/Cd44/Cckbr/A2m/Mef2c/Ctsc	6
GO:0030278	regulation of ossification	3/48	143/28564	0.00180198	0.0108424	0.00659063	Bmp7/Bmp6/Mef2c	3
GO:0055123	digestive system development	3/48	143/28564	0.00180198	0.0108424	0.00659063	Klf5/Cckbr/Cobl	3
GO:0060485	mesenchyme development	4/48	310/28564	0.00181818	0.0108758	0.00661091	Sema3a/Bmp7/Mef2c/Erbb4	4
GO:0007189	adenylate cyclase-activating G protein-coupled receptor signaling pathway	3/48	144/28564	0.00183816	0.0108758	0.00661091	Rxfp1/Drd1/Adcyap1	3
GO:0030833	regulation of actin filament polymerization	3/48	144/28564	0.00183816	0.0108758	0.00661091	Vill/Arhgap18/Fhod3	3
GO:0030336	negative regulation of cell migration	4/48	312/28564	0.00186123	0.0109515	0.00665693	Drd1/Sema3a/Tet1/Mef2c	4
GO:0050773	regulation of dendrite development	3/48	145/28564	0.00187479	0.0109706	0.00666857	Bmp7/Cobl/Reln	3
GO:0048511	rhythmic process	4/48	314/28564	0.00190499	0.0110864	0.00673895	Drd1/Lepr/Cckbr/Prkg2	4
GO:0051347	positive regulation of transferase activity	5/48	532/28564	0.00194663	0.0112672	0.00684884	Adcyap1/Pdgfd/Reln/Mef2c/Erbb4	5
GO:0032409	regulation of transporter activity	4/48	317/28564	0.00197195	0.0112993	0.00686839	Gsg1l/Chrna4/Reln/Mef2c	4
GO:0002065	columnar/cuboidal epithelial cell differentiation	3/48	148/28564	0.00198742	0.0112993	0.00686839	Klf5/Bmp7/Bmp6	3
GO:0090277	positive regulation of peptide hormone secretion	3/48	148/28564	0.00198742	0.0112993	0.00686839	Adcyap1/Lepr/Cckbr	3
GO:0010721	negative regulation of cell development	4/48	318/28564	0.00199463	0.0112993	0.00686839	Adcyap1/Sema3a/Cd44/Bmp7	4
GO:0120161	regulation of cold-induced thermogenesis	3/48	149/28564	0.00202588	0.0114157	0.00693909	Adcyap1/Lepr/Npr3	3
GO:0051493	regulation of cytoskeleton organization	5/48	542/28564	0.0021108	0.0117994	0.00717234	Vill/Ccn2/Arhgap18/Fhod3/Mef2c	5
GO:0002793	positive regulation of peptide secretion	3/48	152/28564	0.00214403	0.0117994	0.00717234	Adcyap1/Lepr/Cckbr	3
GO:0019233	sensory perception of pain	3/48	152/28564	0.00214403	0.0117994	0.00717234	Adcyap1/Cckbr/Chrna4	3
GO:0106106	cold-induced thermogenesis	3/48	152/28564	0.00214403	0.0117994	0.00717234	Adcyap1/Lepr/Npr3	3
GO:2000146	negative regulation of cell motility	4/48	325/28564	0.00215847	0.0117994	0.00717234	Drd1/Sema3a/Tet1/Mef2c	4
GO:0044089	positive regulation of cellular component biogenesis	5/48	545/28564	0.00216198	0.0117994	0.00717234	Ccn2/Bmp7/Cobl/Piezo1/Fnbp1l	5
GO:1901615	organic hydroxy compound metabolic process	5/48	546/28564	0.00217924	0.0117994	0.00717234	Drd1/Lepr/Bmp6/Reln/Nr4a2	5
GO:0007611	learning or memory	4/48	326/28564	0.00218261	0.0117994	0.00717234	Drd1/Reln/Mef2c/Nr4a2	4
GO:0072073	kidney epithelium development	3/48	155/28564	0.00226639	0.0121904	0.00741005	Cd44/Bmp7/Mef2c	3
GO:0043271	negative regulation of monoatomic ion transport	3/48	157/28564	0.00235033	0.0125784	0.00764587	Adcyap1/Prkg2/Htr1b	3
GO:0032870	cellular response to hormone stimulus	5/48	558/28564	0.00239428	0.0127496	0.00774991	Rxfp1/Lepr/Bmp7/Mef2c/Nr4a2	5
GO:0030155	regulation of cell adhesion	6/48	822/28564	0.0024443	0.0129512	0.00787246	Cd44/Bmp7/Piezo1/Bmp6/Mdga2/Fut9	6
GO:0046883	regulation of hormone secretion	4/48	337/28564	0.00246062	0.0129731	0.0078858	Adcyap1/Lepr/Cckbr/Bmp6	4
GO:0045667	regulation of osteoblast differentiation	3/48	160/28564	0.00247981	0.0130098	0.00790814	Bmp7/Bmp6/Mef2c	3
GO:0051147	regulation of muscle cell differentiation	3/48	161/28564	0.00252394	0.0131764	0.00800939	Piezo1/Olfm2/Mef2c	3
GO:1902074	response to salt	4/48	340/28564	0.00254049	0.0131981	0.00802259	Drd1/Chrna4/Htr1b/Mef2c	4
GO:0051146	striated muscle cell differentiation	4/48	342/28564	0.00259471	0.0134144	0.00815405	Klf5/Piezo1/Fhod3/Mef2c	4
GO:0008064	regulation of actin polymerization or depolymerization	3/48	164/28564	0.00265922	0.0136815	0.0083164	Vill/Arhgap18/Fhod3	3
GO:0030832	regulation of actin filament length	3/48	167/28564	0.00279891	0.014331	0.00871119	Vill/Arhgap18/Fhod3	3
GO:1990845	adaptive thermogenesis	3/48	168/28564	0.00284646	0.0145047	0.00881679	Adcyap1/Lepr/Npr3	3
GO:0006897	endocytosis	5/48	583/28564	0.00289152	0.0146642	0.00891372	Cd44/Gsg1l/Htr1b/Fnbp1l/Dcx	5
GO:0021543	pallium development	3/48	173/28564	0.0030917	0.0155314	0.0094409	Drd1/Reln/Dcx	3
GO:0050768	negative regulation of neurogenesis	3/48	173/28564	0.0030917	0.0155314	0.0094409	Adcyap1/Sema3a/Bmp7	3
GO:0040013	negative regulation of locomotion	4/48	360/28564	0.00311906	0.0155953	0.00947972	Drd1/Sema3a/Tet1/Mef2c	4
GO:0051961	negative regulation of nervous system development	3/48	178/28564	0.00334957	0.0166696	0.0101327	Adcyap1/Sema3a/Bmp7	3
GO:0051346	negative regulation of hydrolase activity	4/48	370/28564	0.00343963	0.0169777	0.0103201	Adcyap1/Lepr/Cd44/A2m	4
GO:0098609	cell-cell adhesion	6/48	881/28564	0.00344337	0.0169777	0.0103201	Cd44/Bmp7/Piezo1/Bmp6/Mdga2/Fut9	6
GO:0031214	biomineral tissue development	3/48	181/28564	0.00351044	0.0172286	0.0104726	Bmp7/Bmp6/Mef2c	3
GO:0045860	positive regulation of protein kinase activity	4/48	373/28564	0.00354002	0.0172941	0.0105124	Adcyap1/Pdgfd/Reln/Mef2c	4
GO:0072657	protein localization to membrane	5/48	620/28564	0.00375954	0.0182827	0.0111133	Zdhhc22/Prkg2/Reln/Chm/Erbb4	5
GO:0010817	regulation of hormone levels	5/48	630/28564	0.00402321	0.019476	0.0118386	Adcyap1/Lepr/Cckbr/Bmp6/Reln	5
GO:0030534	adult behavior	3/48	191/28564	0.00408057	0.0196253	0.0119294	Drd1/Chrna4/Nr4a2	3
GO:0006935	chemotaxis	5/48	633/28564	0.00410484	0.0196253	0.0119294	Pdgfd/Sema3a/Bmp7/Reln/Mef2c	5
GO:1903532	positive regulation of secretion by cell	4/48	389/28564	0.00410934	0.0196253	0.0119294	Adcyap1/Lepr/Cckbr/Bmp6	4
GO:0042330	taxis	5/48	635/28564	0.00415992	0.0197782	0.0120223	Pdgfd/Sema3a/Bmp7/Reln/Mef2c	5
GO:0097553	calcium ion transmembrane import into cytosol	3/48	193/28564	0.00420095	0.0198845	0.012087	Ccn2/Drd1/Plch1	3
GO:0035051	cardiocyte differentiation	3/48	196/28564	0.00438555	0.0206664	0.0125622	Bmp7/Fhod3/Mef2c	3
GO:0060562	epithelial tube morphogenesis	4/48	397/28564	0.00441602	0.0207183	0.0125938	Cd44/Bmp7/Cobl/Mef2c	4
GO:0046879	hormone secretion	4/48	404/28564	0.00469676	0.0219388	0.0133357	Adcyap1/Lepr/Cckbr/Bmp6	4
GO:0048638	regulation of developmental growth	4/48	405/28564	0.00473782	0.022034	0.0133935	Sema3a/Mef2c/Dcx/Erbb4	4
GO:0043405	regulation of MAP kinase activity	3/48	202/28564	0.00476936	0.0220842	0.0134241	Pdgfd/Bmp7/Mef2c	3
GO:0032271	regulation of protein polymerization	3/48	206/28564	0.00503619	0.0231187	0.0140529	Vill/Arhgap18/Fhod3	3
GO:0120032	regulation of plasma membrane bounded cell projection assembly	3/48	206/28564	0.00503619	0.0231187	0.0140529	Klf5/Cobl/Fnbp1l	3
GO:0009914	hormone transport	4/48	413/28564	0.00507511	0.0231974	0.0141007	Adcyap1/Lepr/Cckbr/Bmp6	4
GO:0060491	regulation of cell projection assembly	3/48	209/28564	0.00524212	0.0238584	0.0145025	Klf5/Cobl/Fnbp1l	3
GO:0031032	actomyosin structure organization	3/48	212/28564	0.00545308	0.0247129	0.0150219	Ccn2/Fhod3/Mef2c	3
GO:0032102	negative regulation of response to external stimulus	4/48	429/28564	0.00579744	0.0261622	0.0159029	Adcyap1/Sema3a/Cd44/A2m	4
GO:0043066	negative regulation of apoptotic process	6/48	983/28564	0.00585265	0.026247	0.0159545	Adcyap1/Cd44/Bmp7/Mef2c/Nr4a2/Erbb4	6
GO:0007204	positive regulation of cytosolic calcium ion concentration	3/48	218/28564	0.00589018	0.026247	0.0159545	Drd1/Adcyap1/Cckbr	3
GO:0008361	regulation of cell size	3/48	218/28564	0.00589018	0.026247	0.0159545	Sema3a/Prkg2/Dcx	3
GO:0035265	organ growth	3/48	220/28564	0.00604041	0.0266931	0.0162256	Lepr/Mef2c/Erbb4	3
GO:0048639	positive regulation of developmental growth	3/48	220/28564	0.00604041	0.0266931	0.0162256	Mef2c/Dcx/Erbb4	3
GO:0043254	regulation of protein-containing complex assembly	4/48	435/28564	0.00608515	0.0267797	0.0162782	Vill/Piezo1/Arhgap18/Fhod3	4
GO:0009306	protein secretion	4/48	438/28564	0.00623252	0.0273154	0.0166039	Cbln4/Adcyap1/Lepr/Olfm2	4
GO:0035592	establishment of protein localization to extracellular region	4/48	439/28564	0.00628217	0.0274201	0.0166675	Cbln4/Adcyap1/Lepr/Olfm2	4
GO:0051668	localization within membrane	5/48	702/28564	0.0063282	0.0275083	0.0167211	Zdhhc22/Prkg2/Reln/Chm/Erbb4	5
GO:0010942	positive regulation of cell death	5/48	706/28564	0.00647871	0.0280473	0.0170488	Ccn2/Cd44/Bmp7/Mef2c/Ctsc	5
GO:0007623	circadian rhythm	3/48	226/28564	0.00650486	0.0280473	0.0170488	Drd1/Lepr/Prkg2	3
GO:0071692	protein localization to extracellular region	4/48	445/28564	0.00658561	0.0282809	0.0171908	Cbln4/Adcyap1/Lepr/Olfm2	4
GO:0061138	morphogenesis of a branching epithelium	3/48	229/28564	0.00674487	0.0288485	0.0175358	Sema3a/Cd44/Bmp7	3
GO:0003002	regionalization	4/48	449/28564	0.00679324	0.0289392	0.0175909	Sema3a/Cobl/Reln/Mef2c	4
GO:0006816	calcium ion transport	4/48	452/28564	0.00695178	0.0294966	0.0179297	Ccn2/Drd1/Chrna4/Plch1	4
GO:0051047	positive regulation of secretion	4/48	453/28564	0.00700518	0.0296052	0.0179958	Adcyap1/Lepr/Cckbr/Bmp6	4
GO:0031503	protein-containing complex localization	3/48	239/28564	0.0075828	0.0319197	0.0194026	Gsg1l/Reln/Erbb4	3
GO:0040008	regulation of growth	5/48	737/28564	0.007732	0.0324196	0.0197065	Sema3a/Cd44/Mef2c/Dcx/Erbb4	5
GO:0046777	protein autophosphorylation	3/48	242/28564	0.00784566	0.0325785	0.0198031	Pdgfd/Prkg2/Erbb4	3
GO:0071560	cellular response to transforming growth factor beta stimulus	3/48	242/28564	0.00784566	0.0325785	0.0198031	Pdgfd/Tet1/Mef2c	3
GO:0030855	epithelial cell differentiation	5/48	740/28564	0.00786167	0.0325785	0.0198031	Klf5/Bmp7/Bmp6/Mef2c/Erbb4	5
GO:0001667	ameboidal-type cell migration	4/48	470/28564	0.00795488	0.032837	0.0199602	Sema3a/Bmp7/Mef2c/Erbb4	4
GO:0071559	response to transforming growth factor beta	3/48	246/28564	0.00820446	0.0337365	0.020507	Pdgfd/Tet1/Mef2c	3
GO:0001763	morphogenesis of a branching structure	3/48	249/28564	0.00847983	0.0346307	0.0210505	Sema3a/Cd44/Bmp7	3
GO:0061061	muscle structure development	5/48	754/28564	0.00848695	0.0346307	0.0210505	Klf5/Piezo1/Fhod3/Olfm2/Mef2c	5
GO:0009725	response to hormone	5/48	773/28564	0.00938994	0.038169	0.0232013	Rxfp1/Lepr/Bmp7/Mef2c/Nr4a2	5
GO:0060348	bone development	3/48	262/28564	0.00973578	0.0394244	0.0239644	Lepr/Bmp6/Mef2c	3
GO:0090276	regulation of peptide hormone secretion	3/48	264/28564	0.00993812	0.0400913	0.0243698	Adcyap1/Lepr/Cckbr	3
GO:0031348	negative regulation of defense response	3/48	268/28564	0.0103501	0.0415959	0.0252844	Adcyap1/Cd44/A2m	3
GO:0002791	regulation of peptide secretion	3/48	269/28564	0.0104547	0.0418581	0.0254437	Adcyap1/Lepr/Cckbr	3
GO:0045444	fat cell differentiation	3/48	270/28564	0.0105598	0.0419636	0.0255079	Klf5/Bmp7/Nr4a2	3
GO:1903522	regulation of blood circulation	3/48	270/28564	0.0105598	0.0419636	0.0255079	Ccn2/Drd1/Sema3a	3
GO:0090087	regulation of peptide transport	3/48	271/28564	0.0106656	0.0422264	0.0256676	Adcyap1/Lepr/Cckbr	3
GO:0002250	adaptive immune response	4/48	519/28564	0.0111569	0.0440079	0.0267505	Cd44/Erap1/Mef2c/Ctsc	4
GO:0022604	regulation of cell morphogenesis	3/48	278/28564	0.0114234	0.0447275	0.0271879	Cd44/Arhgap18/Reln	3
GO:0034764	positive regulation of transmembrane transport	3/48	278/28564	0.0114234	0.0447275	0.0271879	Drd1/Reln/Erbb4	3
GO:0035418	protein localization to synapse	2/48	100/28564	0.0123266	0.0475645	0.0289125	Reln/Erbb4	2
GO:0044264	cellular polysaccharide metabolic process	2/48	100/28564	0.0123266	0.0475645	0.0289125	Lepr/Fut9	2
GO:0071774	response to fibroblast growth factor	2/48	100/28564	0.0123266	0.0475645	0.0289125	Ccn2/Cd44	2
GO:0120162	positive regulation of cold-induced thermogenesis	2/48	100/28564	0.0123266	0.0475645	0.0289125	Adcyap1/Lepr	2
GO:0048588	developmental cell growth	3/48	287/28564	0.0124424	0.0478379	0.0290786	Sema3a/Cobl/Dcx	3
GO:0019226	transmission of nerve impulse	2/48	101/28564	0.0125623	0.0481252	0.0292533	Drd1/Chrna4	2
GO:0060560	developmental growth involved in morphogenesis	3/48	290/28564	0.0127933	0.0486853	0.0295937	Sema3a/Cobl/Dcx	3
GO:0014910	regulation of smooth muscle cell migration	2/48	102/28564	0.0127999	0.0486853	0.0295937	Pdgfd/Mef2c	2
GO:0046928	regulation of neurotransmitter secretion	2/48	104/28564	0.0132811	0.0503357	0.0305969	Htr1b/Mef2c	2
GO:0019725	cellular homeostasis	5/48	845/28564	0.0134164	0.0506685	0.0307992	Drd1/Lepr/Prkg2/Plch1/Bmp6	5
GO:0072080	nephron tubule development	2/48	105/28564	0.0135246	0.0508963	0.0309377	Cd44/Mef2c	2
GO:0010660	regulation of muscle cell apoptotic process	2/48	106/28564	0.01377	0.0514564	0.0312782	Adcyap1/Erbb4	2
GO:0051153	regulation of striated muscle cell differentiation	2/48	106/28564	0.01377	0.0514564	0.0312782	Piezo1/Mef2c	2
GO:0001657	ureteric bud development	2/48	107/28564	0.0140174	0.0521977	0.0317288	Cd44/Bmp7	2
GO:0016049	cell growth	4/48	558/28564	0.0142294	0.0525746	0.0319579	Sema3a/Cd44/Cobl/Dcx	4
GO:0006576	biogenic amine metabolic process	2/48	108/28564	0.0142667	0.0525746	0.0319579	Drd1/Nr4a2	2
GO:0046849	bone remodeling	2/48	108/28564	0.0142667	0.0525746	0.0319579	Lepr/Htr1b	2
GO:0046889	positive regulation of lipid biosynthetic process	2/48	109/28564	0.014518	0.053316	0.0324086	Bmp6/Erbb4	2
GO:0050807	regulation of synapse organization	3/48	305/28564	0.014633	0.0533263	0.0324148	Reln/Mdga2/Mef2c	3
GO:0042310	vasoconstriction	2/48	110/28564	0.0147711	0.0533263	0.0324148	Drd1/Htr1b	2
GO:0048704	embryonic skeletal system morphogenesis	2/48	110/28564	0.0147711	0.0533263	0.0324148	Bmp7/Mef2c	2
GO:0072163	mesonephric epithelium development	2/48	110/28564	0.0147711	0.0533263	0.0324148	Cd44/Bmp7	2
GO:0072164	mesonephric tubule development	2/48	110/28564	0.0147711	0.0533263	0.0324148	Cd44/Bmp7	2
GO:0010657	muscle cell apoptotic process	2/48	111/28564	0.0150262	0.0537181	0.032653	Adcyap1/Erbb4	2
GO:0060349	bone morphogenesis	2/48	111/28564	0.0150262	0.0537181	0.032653	Bmp6/Mef2c	2
GO:0034220	monoatomic ion transmembrane transport	5/48	871/28564	0.0151205	0.0537181	0.032653	Ccn2/Drd1/Chrna4/Plch1/Reln	5
GO:0071407	cellular response to organic cyclic compound	4/48	570/28564	0.0152729	0.0537181	0.032653	Drd1/Bmp7/Htr1b/Mef2c	4
GO:0005976	polysaccharide metabolic process	2/48	112/28564	0.0152832	0.0537181	0.032653	Lepr/Fut9	2
GO:0008344	adult locomotory behavior	2/48	112/28564	0.0152832	0.0537181	0.032653	Drd1/Nr4a2	2
GO:0061326	renal tubule development	2/48	112/28564	0.0152832	0.0537181	0.032653	Cd44/Mef2c	2
GO:0110020	regulation of actomyosin structure organization	2/48	112/28564	0.0152832	0.0537181	0.032653	Ccn2/Mef2c	2
GO:0001823	mesonephros development	2/48	113/28564	0.0155421	0.0542698	0.0329883	Cd44/Bmp7	2
GO:0014909	smooth muscle cell migration	2/48	113/28564	0.0155421	0.0542698	0.0329883	Pdgfd/Mef2c	2
GO:1905114	cell surface receptor signaling pathway involved in cell-cell signaling	4/48	574/28564	0.0156312	0.0543687	0.0330484	Cd44/Chrna4/Reln/Mef2c	4
GO:0050803	regulation of synapse structure or activity	3/48	313/28564	0.0156725	0.0543687	0.0330484	Reln/Mdga2/Mef2c	3
GO:0035282	segmentation	2/48	114/28564	0.0158028	0.054466	0.0331076	Sema3a/Cobl	2
GO:0048661	positive regulation of smooth muscle cell proliferation	2/48	114/28564	0.0158028	0.054466	0.0331076	Pdgfd/Htr1b	2
GO:0055017	cardiac muscle tissue growth	2/48	115/28564	0.0160655	0.0551926	0.0335493	Mef2c/Erbb4	2
GO:1904659	glucose transmembrane transport	2/48	116/28564	0.01633	0.0558573	0.0339533	Drd1/Erbb4	2
GO:0120031	plasma membrane bounded cell projection assembly	4/48	582/28564	0.0163638	0.0558573	0.0339533	Klf5/Cobl/Fnbp1l/Dcx	4
GO:0008645	hexose transmembrane transport	2/48	117/28564	0.0165964	0.0561763	0.0341472	Drd1/Erbb4	2
GO:0120034	positive regulation of plasma membrane bounded cell projection assembly	2/48	117/28564	0.0165964	0.0561763	0.0341472	Cobl/Fnbp1l	2
GO:0030072	peptide hormone secretion	3/48	320/28564	0.0166155	0.0561763	0.0341472	Adcyap1/Lepr/Cckbr	3
GO:0021987	cerebral cortex development	2/48	118/28564	0.0168646	0.0567464	0.0344938	Reln/Dcx	2
GO:0007548	sex differentiation	3/48	322/28564	0.0168907	0.0567464	0.0344938	Adcyap1/Sema3a/Bmp6	3
GO:0045927	positive regulation of growth	3/48	323/28564	0.0170293	0.0570321	0.0346674	Mef2c/Dcx/Erbb4	3
GO:0014020	primary neural tube formation	2/48	119/28564	0.0171347	0.0572053	0.0347727	Bmp7/Cobl	2
GO:0015749	monosaccharide transmembrane transport	2/48	120/28564	0.0174067	0.0575718	0.0349954	Drd1/Erbb4	2
GO:0072009	nephron epithelium development	2/48	120/28564	0.0174067	0.0575718	0.0349954	Cd44/Mef2c	2
GO:2000106	regulation of leukocyte apoptotic process	2/48	120/28564	0.0174067	0.0575718	0.0349954	Cd44/Mef2c	2
GO:0030031	cell projection assembly	4/48	594/28564	0.0175029	0.0577107	0.0350799	Klf5/Cobl/Fnbp1l/Dcx	4
GO:0071496	cellular response to external stimulus	3/48	327/28564	0.01759	0.0578188	0.0351456	Piezo1/Bmp6/Nr4a2	3
GO:0007589	body fluid secretion	2/48	121/28564	0.0176805	0.0579273	0.0352115	Npr3/Erbb4	2
GO:0002790	peptide secretion	3/48	328/28564	0.0177317	0.0579273	0.0352115	Adcyap1/Lepr/Cckbr	3
GO:0008306	associative learning	2/48	122/28564	0.0179561	0.0583026	0.0354397	Drd1/Reln	2
GO:0022600	digestive system process	2/48	122/28564	0.0179561	0.0583026	0.0354397	Cckbr/Npr3	2
GO:0022409	positive regulation of cell-cell adhesion	3/48	330/28564	0.0180172	0.0583231	0.0354522	Cd44/Bmp7/Piezo1	3
GO:0006612	protein targeting to membrane	2/48	123/28564	0.0182336	0.0586669	0.0356611	Zdhhc22/Chm	2
GO:0051952	regulation of amine transport	2/48	123/28564	0.0182336	0.0586669	0.0356611	Chrna4/Htr1b	2
GO:0030001	metal ion transport	5/48	917/28564	0.0184827	0.0588542	0.035775	Ccn2/Drd1/Adcyap1/Chrna4/Plch1	5
GO:0046620	regulation of organ growth	2/48	124/28564	0.0185128	0.0588542	0.035775	Mef2c/Erbb4	2
GO:0051588	regulation of neurotransmitter transport	2/48	124/28564	0.0185128	0.0588542	0.035775	Htr1b/Mef2c	2
GO:0060419	heart growth	2/48	124/28564	0.0185128	0.0588542	0.035775	Mef2c/Erbb4	2
GO:0009410	response to xenobiotic stimulus	3/48	335/28564	0.0187421	0.0594058	0.0361103	Drd1/Htr1b/Mef2c	3
GO:0070588	calcium ion transmembrane transport	3/48	339/28564	0.0193337	0.061006	0.037083	Ccn2/Drd1/Plch1	3
GO:0051209	release of sequestered calcium ion into cytosol	2/48	127/28564	0.0193615	0.061006	0.037083	Drd1/Plch1	2
GO:0014812	muscle cell migration	2/48	128/28564	0.019648	0.0614843	0.0373737	Pdgfd/Mef2c	2
GO:0051283	negative regulation of sequestering of calcium ion	2/48	128/28564	0.019648	0.0614843	0.0373737	Drd1/Plch1	2
GO:0015833	peptide transport	3/48	342/28564	0.0197841	0.0614843	0.0373737	Adcyap1/Lepr/Cckbr	3
GO:0009308	amine metabolic process	2/48	129/28564	0.0199363	0.0614843	0.0373737	Drd1/Nr4a2	2
GO:0015837	amine transport	2/48	129/28564	0.0199363	0.0614843	0.0373737	Chrna4/Htr1b	2
GO:0034219	carbohydrate transmembrane transport	2/48	129/28564	0.0199363	0.0614843	0.0373737	Drd1/Erbb4	2
GO:0061387	regulation of extent of cell growth	2/48	129/28564	0.0199363	0.0614843	0.0373737	Sema3a/Dcx	2
GO:0007169	transmembrane receptor protein tyrosine kinase signaling pathway	4/48	619/28564	0.0200329	0.0614843	0.0373737	Ccn2/Pdgfd/Efs/Erbb4	4
GO:0043065	positive regulation of apoptotic process	4/48	619/28564	0.0200329	0.0614843	0.0373737	Cd44/Bmp7/Mef2c/Ctsc	4
GO:0042752	regulation of circadian rhythm	2/48	130/28564	0.0202264	0.0617224	0.0375184	Drd1/Lepr	2
GO:0051282	regulation of sequestering of calcium ion	2/48	130/28564	0.0202264	0.0617224	0.0375184	Drd1/Plch1	2
GO:0010927	cellular component assembly involved in morphogenesis	2/48	132/28564	0.0208119	0.0629677	0.0382754	Fhod3/Mef2c	2
GO:0043406	positive regulation of MAP kinase activity	2/48	132/28564	0.0208119	0.0629677	0.0382754	Pdgfd/Mef2c	2
GO:0051208	sequestering of calcium ion	2/48	132/28564	0.0208119	0.0629677	0.0382754	Drd1/Plch1	2
GO:0099072	regulation of postsynaptic membrane neurotransmitter receptor levels	2/48	133/28564	0.0211072	0.0635006	0.0385993	Gsg1l/Erbb4	2
GO:1902414	protein localization to cell junction	2/48	133/28564	0.0211072	0.0635006	0.0385993	Reln/Erbb4	2
GO:0001841	neural tube formation	2/48	134/28564	0.0214044	0.063941	0.038867	Bmp7/Cobl	2
GO:0060996	dendritic spine development	2/48	134/28564	0.0214044	0.063941	0.038867	Reln/Mef2c	2
GO:0043068	positive regulation of programmed cell death	4/48	632/28564	0.0214337	0.063941	0.038867	Cd44/Bmp7/Mef2c/Ctsc	4
GO:0071900	regulation of protein serine/threonine kinase activity	3/48	354/28564	0.0216438	0.0643874	0.0391384	Pdgfd/Bmp7/Mef2c	3
GO:0070925	organelle assembly	5/48	958/28564	0.0218705	0.0648804	0.039438	Fhod3/Reln/Fnbp1l/Mef2c/Dcx	5
GO:0001776	leukocyte homeostasis	2/48	136/28564	0.0220039	0.0649145	0.0394588	Cd44/Mef2c	2
GO:0009636	response to toxic substance	2/48	136/28564	0.0220039	0.0649145	0.0394588	Htr1b/Nr4a2	2
GO:0008277	regulation of G protein-coupled receptor signaling pathway	2/48	137/28564	0.0223063	0.0656247	0.0398905	Adcyap1/Htr1b	2
GO:0055080	monoatomic cation homeostasis	4/48	641/28564	0.0224382	0.065831	0.0400159	Drd1/Cckbr/Plch1/Bmp6	4
GO:0007586	digestion	2/48	139/28564	0.0229162	0.0670487	0.040756	Cckbr/Npr3	2
GO:0051963	regulation of synapse assembly	2/48	140/28564	0.0232237	0.0677623	0.0411898	Mdga2/Mef2c	2
GO:0050801	monoatomic ion homeostasis	4/48	652/28564	0.0237046	0.0689765	0.0419279	Drd1/Cckbr/Plch1/Bmp6	4
GO:0052548	regulation of endopeptidase activity	3/48	368/28564	0.0239312	0.0694461	0.0422134	Ccn2/Cd44/A2m	3
GO:0014902	myotube differentiation	2/48	144/28564	0.0244709	0.0706274	0.0429314	Klf5/Piezo1	2
GO:0048675	axon extension	2/48	144/28564	0.0244709	0.0706274	0.0429314	Sema3a/Dcx	2
GO:0007507	heart development	4/48	665/28564	0.0252567	0.0726984	0.0441903	Bmp7/Fhod3/Mef2c/Erbb4	4
GO:0090101	negative regulation of transmembrane receptor protein serine/threonine kinase signaling pathway	2/48	147/28564	0.025424	0.0729141	0.0443214	Vwc2l/Tet1	2
GO:0050727	regulation of inflammatory response	3/48	377/28564	0.0254686	0.0729141	0.0443214	Adcyap1/Cd44/Ctsc	3
GO:0048706	embryonic skeletal system development	2/48	148/28564	0.0257451	0.073508	0.0446824	Bmp7/Mef2c	2
GO:0010639	negative regulation of organelle organization	3/48	381/28564	0.0261687	0.0743191	0.0451754	Vill/Bmp7/Fhod3	3
GO:0021700	developmental maturation	3/48	381/28564	0.0261687	0.0743191	0.0451754	Reln/Nr4a2/Erbb4	3
GO:0031623	receptor internalization	2/48	151/28564	0.0267182	0.0756778	0.0460013	Gsg1l/Htr1b	2
GO:0003206	cardiac chamber morphogenesis	2/48	152/28564	0.0270458	0.0758346	0.0460966	Bmp7/Mef2c	2
GO:0045598	regulation of fat cell differentiation	2/48	152/28564	0.0270458	0.0758346	0.0460966	Klf5/Bmp7	2
GO:0071887	leukocyte apoptotic process	2/48	152/28564	0.0270458	0.0758346	0.0460966	Cd44/Mef2c	2
GO:0048167	regulation of synaptic plasticity	3/48	386/28564	0.0270583	0.0758346	0.0460966	Drd1/Reln/Mef2c	3
GO:0050728	negative regulation of inflammatory response	2/48	153/28564	0.0273751	0.076521	0.0465139	Adcyap1/Cd44	2
GO:1990778	protein localization to cell periphery	3/48	389/28564	0.0275999	0.0766413	0.046587	Zdhhc22/Prkg2/Erbb4	3
GO:0001508	action potential	2/48	154/28564	0.027706	0.0766413	0.046587	Drd1/Chrna4	2
GO:0001936	regulation of endothelial cell proliferation	2/48	154/28564	0.027706	0.0766413	0.046587	Bmp6/Mef2c	2
GO:0031333	negative regulation of protein-containing complex assembly	2/48	154/28564	0.027706	0.0766413	0.046587	Vill/Fhod3	2
GO:0008643	carbohydrate transport	2/48	155/28564	0.0280386	0.0773603	0.047024	Drd1/Erbb4	2
GO:0055007	cardiac muscle cell differentiation	2/48	157/28564	0.0287085	0.079004	0.0480232	Fhod3/Mef2c	2
GO:0070661	leukocyte proliferation	3/48	396/28564	0.0288861	0.0792878	0.0481957	Cd44/Npr3/Mef2c	3
GO:0050865	regulation of cell activation	4/48	697/28564	0.0293362	0.0802433	0.0487765	Ccn2/Cd44/Mef2c/Ctsc	4
GO:0001838	embryonic epithelial tube formation	2/48	159/28564	0.0293849	0.0802433	0.0487765	Bmp7/Cobl	2
GO:0031099	regeneration	2/48	161/28564	0.0300676	0.0818976	0.0497821	Klf5/Erbb4	2
GO:0007613	memory	2/48	162/28564	0.0304113	0.0826226	0.0502228	Drd1/Reln	2
GO:0009755	hormone-mediated signaling pathway	2/48	163/28564	0.0307566	0.0833481	0.0506638	Rxfp1/Bmp7	2
GO:0030879	mammary gland development	2/48	165/28564	0.031452	0.0850161	0.0516777	Rxfp1/Erbb4	2
GO:0030856	regulation of epithelial cell differentiation	2/48	168/28564	0.0325066	0.0876444	0.0532753	Bmp7/Bmp6	2
GO:0007269	neurotransmitter secretion	2/48	169/28564	0.0328612	0.0881542	0.0535852	Htr1b/Mef2c	2
GO:0099643	signal release from synapse	2/48	169/28564	0.0328612	0.0881542	0.0535852	Htr1b/Mef2c	2
GO:0072175	epithelial tube formation	2/48	170/28564	0.0332174	0.0888858	0.0540299	Bmp7/Cobl	2
GO:0007159	leukocyte cell-cell adhesion	3/48	420/28564	0.0335352	0.0891708	0.0542032	Cd44/Bmp7/Fut9	3
GO:0001935	endothelial cell proliferation	2/48	171/28564	0.0335751	0.0891708	0.0542032	Bmp6/Mef2c	2
GO:0009266	response to temperature stimulus	2/48	171/28564	0.0335751	0.0891708	0.0542032	Arpp21/Htr1b	2
GO:2001233	regulation of apoptotic signaling pathway	3/48	424/28564	0.0343459	0.090991	0.0553096	Cd44/Ctsc/Nr4a2	3
GO:0046661	male sex differentiation	2/48	174/28564	0.0346573	0.0915882	0.0556726	Sema3a/Bmp6	2
GO:0001654	eye development	3/48	426/28564	0.0347551	0.0916193	0.0556915	Bmp7/Bmp6/Dcx	3
GO:0050678	regulation of epithelial cell proliferation	3/48	427/28564	0.0349607	0.0919181	0.0558731	Bmp6/Mef2c/Erbb4	3
GO:0007264	small GTPase mediated signal transduction	3/48	428/28564	0.0351669	0.0919181	0.0558731	Arhgap18/Reln/Chm	3
GO:0042886	amide transport	3/48	429/28564	0.0353737	0.0919181	0.0558731	Adcyap1/Lepr/Cckbr	3
GO:0150063	visual system development	3/48	429/28564	0.0353737	0.0919181	0.0558731	Bmp7/Bmp6/Dcx	3
GO:0051494	negative regulation of cytoskeleton organization	2/48	176/28564	0.0353863	0.0919181	0.0558731	Vill/Fhod3	2
GO:0071248	cellular response to metal ion	2/48	176/28564	0.0353863	0.0919181	0.0558731	Bmp6/Mef2c	2
GO:0055082	intracellular chemical homeostasis	4/48	741/28564	0.0355553	0.0919755	0.055908	Drd1/Lepr/Plch1/Bmp6	4
GO:0050867	positive regulation of cell activation	3/48	430/28564	0.0355811	0.0919755	0.055908	Ccn2/Mef2c/Ctsc	3
GO:1902904	negative regulation of supramolecular fiber organization	2/48	178/28564	0.0361212	0.0931421	0.0566171	Vill/Fhod3	2
GO:0048880	sensory system development	3/48	433/28564	0.0362073	0.0931421	0.0566171	Bmp7/Bmp6/Dcx	3
GO:0045596	negative regulation of cell differentiation	4/48	748/28564	0.0366104	0.0939521	0.0571095	Adcyap1/Sema3a/Cd44/Bmp7	4
GO:0003012	muscle system process	3/48	436/28564	0.0368393	0.0943121	0.0573283	Ccn2/Drd1/Mef2c	3
GO:0098655	monoatomic cation transmembrane transport	4/48	752/28564	0.0372215	0.0950622	0.0577843	Ccn2/Drd1/Chrna4/Plch1	4
GO:0071466	cellular response to xenobiotic stimulus	2/48	183/28564	0.0379844	0.0967785	0.0588276	Htr1b/Mef2c	2
GO:0035148	tube formation	2/48	185/28564	0.0387399	0.0982334	0.0597119	Bmp7/Cobl	2
GO:0045834	positive regulation of lipid metabolic process	2/48	185/28564	0.0387399	0.0982334	0.0597119	Bmp6/Erbb4	2
GO:0050770	regulation of axonogenesis	2/48	187/28564	0.0395012	0.0999257	0.0607406	Sema3a/Dcx	2
GO:0016331	morphogenesis of embryonic epithelium	2/48	188/28564	0.0398839	0.100655	0.0611839	Bmp7/Cobl	2
GO:0031349	positive regulation of defense response	3/48	452/28564	0.0403056	0.101479	0.0616846	Cckbr/Mef2c/Ctsc	3
GO:0007612	learning	2/48	190/28564	0.0406537	0.102114	0.0620706	Drd1/Reln	2
GO:0048754	branching morphogenesis of an epithelial tube	2/48	191/28564	0.0410407	0.102843	0.0625141	Cd44/Bmp7	2
GO:0030162	regulation of proteolysis	4/48	779/28564	0.0415017	0.103754	0.0630678	Ccn2/Cd44/A2m/Ctsc	4
GO:0010951	negative regulation of endopeptidase activity	2/48	193/28564	0.041819	0.104303	0.0634011	Cd44/A2m	2
GO:0044703	multi-organism reproductive process	2/48	194/28564	0.0422102	0.105032	0.0638447	Rxfp1/A2m	2
GO:0001558	regulation of cell growth	3/48	464/28564	0.043011	0.106776	0.0649044	Sema3a/Cd44/Dcx	3
GO:1902075	cellular response to salt	2/48	197/28564	0.0433922	0.107416	0.0652935	Chrna4/Mef2c	2
GO:0052547	regulation of peptidase activity	3/48	466/28564	0.0434706	0.107416	0.0652935	Ccn2/Cd44/A2m	3
GO:0003205	cardiac chamber development	2/48	199/28564	0.044187	0.108682	0.066063	Bmp7/Mef2c	2
GO:0043524	negative regulation of neuron apoptotic process	2/48	199/28564	0.044187	0.108682	0.066063	Mef2c/Nr4a2	2
GO:0006954	inflammatory response	4/48	796/28564	0.0443356	0.108796	0.0661324	Adcyap1/Cd44/Bmp6/Ctsc	4
GO:0008016	regulation of heart contraction	2/48	200/28564	0.0445865	0.10891	0.0662016	Ccn2/Sema3a	2
GO:0021915	neural tube development	2/48	200/28564	0.0445865	0.10891	0.0662016	Bmp7/Cobl	2
GO:0006486	protein glycosylation	2/48	202/28564	0.0453895	0.110365	0.0670862	Tet1/Fut9	2
GO:0043413	macromolecule glycosylation	2/48	202/28564	0.0453895	0.110365	0.0670862	Tet1/Fut9	2
GO:0006469	negative regulation of protein kinase activity	2/48	206/28564	0.0470116	0.113531	0.069011	Drd1/Bmp7	2
GO:0034767	positive regulation of monoatomic ion transmembrane transport	2/48	206/28564	0.0470116	0.113531	0.069011	Drd1/Reln	2
GO:0071902	positive regulation of protein serine/threonine kinase activity	2/48	206/28564	0.0470116	0.113531	0.069011	Pdgfd/Mef2c	2
GO:0050777	negative regulation of immune response	2/48	207/28564	0.0474205	0.11426	0.0694537	Adcyap1/A2m	2
GO:0044706	multi-multicellular organism process	2/48	209/28564	0.0482421	0.115716	0.0703388	Rxfp1/A2m	2
GO:1990138	neuron projection extension	2/48	209/28564	0.0482421	0.115716	0.0703388	Sema3a/Dcx	2
GO:0007519	skeletal muscle tissue development	2/48	211/28564	0.049069	0.116648	0.0709057	Klf5/Mef2c	2
GO:0022408	negative regulation of cell-cell adhesion	2/48	211/28564	0.049069	0.116648	0.0709057	Cd44/Bmp6	2
GO:0043281	regulation of cysteine-type endopeptidase activity involved in apoptotic process	2/48	211/28564	0.049069	0.116648	0.0709057	Ccn2/Cd44	2
GO:0046890	regulation of lipid biosynthetic process	2/48	211/28564	0.049069	0.116648	0.0709057	Bmp6/Erbb4	2
GO:0019827	stem cell population maintenance	2/48	212/28564	0.0494844	0.117374	0.0713466	Bmp7/Tet1	2
GO:0034765	regulation of monoatomic ion transmembrane transport	3/48	492/28564	0.0496708	0.117554	0.0714562	Drd1/Chrna4/Reln	3
GO:0098727	maintenance of cell number	2/48	217/28564	0.0515806	0.121803	0.0740392	Bmp7/Tet1	2
GO:0014070	response to organic cyclic compound	4/48	838/28564	0.0517978	0.122046	0.0741864	Drd1/Bmp7/Htr1b/Mef2c	4
GO:0016051	carbohydrate biosynthetic process	2/48	220/28564	0.0528536	0.124258	0.0755314	Lepr/Fut9	2
GO:0050673	epithelial cell proliferation	3/48	508/28564	0.0536912	0.125713	0.0764158	Bmp6/Mef2c/Erbb4	3
GO:0008217	regulation of blood pressure	2/48	222/28564	0.0537085	0.125713	0.0764158	Erap1/Npr3	2
GO:0060538	skeletal muscle organ development	2/48	224/28564	0.0545683	0.127167	0.0772994	Klf5/Mef2c	2
GO:0070085	glycosylation	2/48	224/28564	0.0545683	0.127167	0.0772994	Tet1/Fut9	2
GO:0006836	neurotransmitter transport	2/48	225/28564	0.0550001	0.127615	0.0775715	Htr1b/Mef2c	2
GO:2000241	regulation of reproductive process	2/48	225/28564	0.0550001	0.127615	0.0775715	Sema3a/Bmp7	2
GO:0001666	response to hypoxia	2/48	227/28564	0.0558673	0.129138	0.0784974	Chrna4/Nr4a2	2
GO:0002683	negative regulation of immune system process	3/48	517/28564	0.0560203	0.129138	0.0784974	Adcyap1/Cd44/A2m	3
GO:0045785	positive regulation of cell adhesion	3/48	517/28564	0.0560203	0.129138	0.0784974	Cd44/Bmp7/Piezo1	3
GO:1903829	positive regulation of protein localization	3/48	519/28564	0.0565444	0.130064	0.0790606	Lepr/Prkg2/Erbb4	3
GO:0033673	negative regulation of kinase activity	2/48	230/28564	0.0571772	0.131236	0.0797731	Drd1/Bmp7	2
GO:0043009	chordate embryonic development	4/48	868/28564	0.0575283	0.131758	0.0800903	Bmp7/Cobl/Tet1/Mef2c	4
GO:0050920	regulation of chemotaxis	2/48	232/28564	0.0580564	0.132683	0.0806522	Pdgfd/Sema3a	2
GO:0051051	negative regulation of transport	3/48	526/28564	0.0583975	0.133176	0.0809522	Adcyap1/Prkg2/Htr1b	3
GO:0046649	lymphocyte activation	4/48	877/28564	0.0593121	0.134849	0.081969	Lepr/Cd44/Chrna4/Mef2c	4
GO:0055001	muscle cell development	2/48	235/28564	0.0593842	0.134849	0.081969	Fhod3/Mef2c	2
GO:0002685	regulation of leukocyte migration	2/48	236/28564	0.0598292	0.134996	0.0820583	Pdgfd/Fut9	2
GO:0051056	regulation of small GTPase mediated signal transduction	2/48	236/28564	0.0598292	0.134996	0.0820583	Arhgap18/Reln	2
GO:1901617	organic hydroxy compound biosynthetic process	2/48	236/28564	0.0598292	0.134996	0.0820583	Bmp6/Nr4a2	2
GO:0030003	intracellular monoatomic cation homeostasis	3/48	532/28564	0.0600087	0.135115	0.0821305	Drd1/Plch1/Bmp6	3
GO:0050679	positive regulation of epithelial cell proliferation	2/48	237/28564	0.0602753	0.135153	0.0821535	Bmp6/Erbb4	2
GO:1903131	mononuclear cell differentiation	3/48	533/28564	0.0602793	0.135153	0.0821535	Lepr/Cd44/Mef2c	3
GO:0009792	embryo development ending in birth or egg hatching	4/48	885/28564	0.0609227	0.136308	0.082856	Bmp7/Cobl/Tet1/Mef2c	4
GO:0030324	lung development	2/48	239/28564	0.061171	0.136577	0.0830193	Rxfp1/Ccn2	2
GO:0048568	embryonic organ development	3/48	537/28564	0.0613675	0.136729	0.0831117	Bmp7/Cobl/Mef2c	3
GO:0001505	regulation of neurotransmitter levels	2/48	242/28564	0.0625232	0.137577	0.0836272	Htr1b/Mef2c	2
GO:0002064	epithelial cell development	2/48	242/28564	0.0625232	0.137577	0.0836272	Klf5/Bmp6	2
GO:0030323	respiratory tube development	2/48	242/28564	0.0625232	0.137577	0.0836272	Rxfp1/Ccn2	2
GO:0051651	maintenance of location in cell	2/48	242/28564	0.0625232	0.137577	0.0836272	Drd1/Plch1	2
GO:0060047	heart contraction	2/48	242/28564	0.0625232	0.137577	0.0836272	Ccn2/Sema3a	2
GO:1901888	regulation of cell junction assembly	2/48	242/28564	0.0625232	0.137577	0.0836272	Mdga2/Mef2c	2
GO:0006873	intracellular monoatomic ion homeostasis	3/48	542/28564	0.0627408	0.137771	0.0837451	Drd1/Plch1/Bmp6	3
GO:0008406	gonad development	2/48	246/28564	0.0643421	0.140419	0.0853546	Adcyap1/Sema3a	2
GO:0042445	hormone metabolic process	2/48	246/28564	0.0643421	0.140419	0.0853546	Bmp6/Reln	2
GO:2001234	negative regulation of apoptotic signaling pathway	2/48	246/28564	0.0643421	0.140419	0.0853546	Cd44/Nr4a2	2
GO:0010035	response to inorganic substance	3/48	549/28564	0.0646876	0.14084	0.0856106	Bmp6/Mef2c/Nr4a2	3
GO:0071241	cellular response to inorganic substance	2/48	247/28564	0.0647996	0.14084	0.0856106	Bmp6/Mef2c	2
GO:0030100	regulation of endocytosis	2/48	248/28564	0.0652582	0.141548	0.086041	Gsg1l/Dcx	2
GO:0050776	regulation of immune response	4/48	907/28564	0.0654724	0.141679	0.0861209	Adcyap1/Cd44/A2m/Mef2c	4
GO:0002819	regulation of adaptive immune response	2/48	249/28564	0.065718	0.141679	0.0861209	Cd44/Mef2c	2
GO:0010632	regulation of epithelial cell migration	2/48	249/28564	0.065718	0.141679	0.0861209	Sema3a/Mef2c	2
GO:0045137	development of primary sexual characteristics	2/48	250/28564	0.0661788	0.142385	0.0865497	Adcyap1/Sema3a	2
GO:2000116	regulation of cysteine-type endopeptidase activity	2/48	251/28564	0.0666408	0.14309	0.0869781	Ccn2/Cd44	2
GO:0003015	heart process	2/48	255/28564	0.0684995	0.14649	0.089045	Ccn2/Sema3a	2
GO:0036293	response to decreased oxygen levels	2/48	255/28564	0.0684995	0.14649	0.089045	Chrna4/Nr4a2	2
GO:0051345	positive regulation of hydrolase activity	3/48	564/28564	0.0689534	0.146899	0.0892939	Ccn2/Adcyap1/Mef2c	3
GO:0060291	long-term synaptic potentiation	2/48	256/28564	0.0689668	0.146899	0.0892939	Drd1/Reln	2
GO:0050670	regulation of lymphocyte proliferation	2/48	260/28564	0.070847	0.150303	0.0913627	Cd44/Mef2c	2
GO:0090150	establishment of protein localization to membrane	2/48	260/28564	0.070847	0.150303	0.0913627	Zdhhc22/Chm	2
GO:0090257	regulation of muscle system process	2/48	261/28564	0.0713196	0.151005	0.0917894	Ccn2/Mef2c	2
GO:0090068	positive regulation of cell cycle process	2/48	262/28564	0.0717934	0.151706	0.0922158	Ccn2/Ncapd2	2
GO:0031668	cellular response to extracellular stimulus	2/48	264/28564	0.0727439	0.153107	0.0930674	Bmp6/Nr4a2	2
GO:0032944	regulation of mononuclear cell proliferation	2/48	264/28564	0.0727439	0.153107	0.0930674	Cd44/Mef2c	2
GO:0098771	inorganic ion homeostasis	3/48	578/28564	0.0730487	0.153445	0.093273	Drd1/Plch1/Bmp6	3
GO:0030073	insulin secretion	2/48	265/28564	0.0732208	0.153504	0.0933087	Adcyap1/Lepr	2
GO:0010466	negative regulation of peptidase activity	2/48	267/28564	0.0741775	0.155204	0.0943422	Cd44/A2m	2
GO:0051348	negative regulation of transferase activity	2/48	269/28564	0.0751383	0.156907	0.0953768	Drd1/Bmp7	2
GO:0060541	respiratory system development	2/48	270/28564	0.0756203	0.157604	0.0958007	Rxfp1/Ccn2	2
GO:0099003	vesicle-mediated transport in synapse	2/48	271/28564	0.0761032	0.158301	0.0962242	Gsg1l/Htr1b	2
GO:1901215	negative regulation of neuron death	2/48	273/28564	0.0770721	0.160003	0.0972593	Mef2c/Nr4a2	2
GO:0032103	positive regulation of response to external stimulus	3/48	593/28564	0.0775562	0.160076	0.0973035	Pdgfd/Bmp6/Ctsc	3
GO:0010001	glial cell differentiation	2/48	274/28564	0.077558	0.160076	0.0973035	Drd1/Reln	2
GO:0043270	positive regulation of monoatomic ion transport	2/48	274/28564	0.077558	0.160076	0.0973035	Drd1/Reln	2
GO:0140014	mitotic nuclear division	2/48	280/28564	0.0804941	0.165815	0.100792	Bmp7/Ncapd2	2
GO:0032880	regulation of protein localization	4/48	981/28564	0.0820531	0.1687	0.102546	Adcyap1/Lepr/Prkg2/Erbb4	4
GO:0060627	regulation of vesicle-mediated transport	3/48	613/28564	0.0837542	0.171866	0.10447	Gsg1l/Htr1b/Dcx	3
GO:0070663	regulation of leukocyte proliferation	2/48	287/28564	0.0839632	0.171963	0.104529	Cd44/Mef2c	2
GO:0006605	protein targeting	2/48	290/28564	0.0854639	0.174366	0.10599	Zdhhc22/Chm	2
GO:0009101	glycoprotein biosynthetic process	2/48	290/28564	0.0854639	0.174366	0.10599	Tet1/Fut9	2
GO:0003007	heart morphogenesis	2/48	291/28564	0.085966	0.175055	0.106409	Bmp7/Mef2c	2
GO:0043523	regulation of neuron apoptotic process	2/48	294/28564	0.0874777	0.177794	0.108073	Mef2c/Nr4a2	2
GO:0019932	second-messenger-mediated signaling	2/48	295/28564	0.0879835	0.178481	0.108491	Drd1/Adcyap1	2
GO:0006959	humoral immune response	2/48	299/28564	0.0900152	0.181909	0.110575	A2m/Mef2c	2
GO:0044262	cellular carbohydrate metabolic process	2/48	299/28564	0.0900152	0.181909	0.110575	Lepr/Fut9	2
GO:0045165	cell fate commitment	2/48	303/28564	0.092061	0.185691	0.112874	Mef2c/Erbb4	2
GO:0002694	regulation of leukocyte activation	3/48	641/28564	0.0927808	0.186789	0.113541	Cd44/Mef2c/Ctsc	3
GO:0007423	sensory organ development	3/48	646/28564	0.0944344	0.189453	0.11516	Bmp7/Bmp6/Dcx	3
GO:0071222	cellular response to lipopolysaccharide	2/48	308/28564	0.0946376	0.189453	0.11516	Bmp6/Mef2c	2
GO:0072659	protein localization to plasma membrane	2/48	308/28564	0.0946376	0.189453	0.11516	Zdhhc22/Prkg2	2
GO:0010038	response to metal ion	2/48	309/28564	0.0951554	0.190132	0.115573	Bmp6/Mef2c	2
GO:0097190	apoptotic signaling pathway	3/48	656/28564	0.0977784	0.195007	0.118537	Cd44/Ctsc/Nr4a2	3
GO:0070482	response to oxygen levels	2/48	315/28564	0.0982799	0.195641	0.118922	Chrna4/Nr4a2	2
GO:0006874	intracellular calcium ion homeostasis	2/48	316/28564	0.0988035	0.196317	0.119333	Drd1/Plch1	2
GO:0006936	muscle contraction	2/48	318/28564	0.0998532	0.196569	0.119486	Ccn2/Drd1	2
GO:0007162	negative regulation of cell adhesion	2/48	318/28564	0.0998532	0.196569	0.119486	Cd44/Bmp6	2
GO:0042113	B cell activation	2/48	318/28564	0.0998532	0.196569	0.119486	Chrna4/Mef2c	2
GO:0050769	positive regulation of neurogenesis	2/48	318/28564	0.0998532	0.196569	0.119486	Reln/Dcx	2
GO:0071219	cellular response to molecule of bacterial origin	2/48	318/28564	0.0998532	0.196569	0.119486	Bmp6/Mef2c	2
GO:0090287	regulation of cellular response to growth factor stimulus	2/48	320/28564	0.100906	0.198275	0.120523	Vwc2l/Tet1	2
GO:0030198	extracellular matrix organization	2/48	322/28564	0.101962	0.199981	0.12156	Rxfp1/Ccn2	2
GO:0048598	embryonic morphogenesis	3/48	670/28564	0.102541	0.200747	0.122026	Bmp7/Cobl/Mef2c	3
GO:0043062	extracellular structure organization	2/48	324/28564	0.103021	0.200948	0.122148	Rxfp1/Ccn2	2
GO:0045229	external encapsulating structure organization	2/48	324/28564	0.103021	0.200948	0.122148	Rxfp1/Ccn2	2
GO:0071396	cellular response to lipid	3/48	672/28564	0.103229	0.200986	0.122171	Bmp7/Bmp6/Mef2c	3
GO:0034504	protein localization to nucleus	2/48	325/28564	0.103552	0.201246	0.122329	Drd1/Bmp7	2
GO:0018105	peptidyl-serine phosphorylation	2/48	326/28564	0.104083	0.20191	0.122733	Cd44/Prkg2	2
GO:0010631	epithelial cell migration	2/48	327/28564	0.104616	0.202574	0.123136	Sema3a/Mef2c	2
GO:0008610	lipid biosynthetic process	3/48	678/28564	0.105305	0.203538	0.123722	Bmp6/Fut9/Erbb4	3
GO:0090132	epithelium migration	2/48	329/28564	0.105682	0.203898	0.123941	Sema3a/Mef2c	2
GO:0030217	T cell differentiation	2/48	331/28564	0.106752	0.205219	0.124744	Lepr/Cd44	2
GO:0090130	tissue migration	2/48	331/28564	0.106752	0.205219	0.124744	Sema3a/Mef2c	2
GO:0048562	embryonic organ morphogenesis	2/48	334/28564	0.108363	0.207939	0.126397	Bmp7/Mef2c	2
GO:0051402	neuron apoptotic process	2/48	337/28564	0.10998	0.210662	0.128053	Mef2c/Nr4a2	2
GO:0002521	leukocyte differentiation	3/48	702/28564	0.113771	0.217534	0.13223	Lepr/Cd44/Mef2c	3
GO:0018209	peptidyl-serine modification	2/48	345/28564	0.114323	0.217807	0.132396	Cd44/Prkg2	2
GO:0071216	cellular response to biotic stimulus	2/48	345/28564	0.114323	0.217807	0.132396	Bmp6/Mef2c	2
GO:0006066	alcohol metabolic process	2/48	346/28564	0.114869	0.218457	0.132791	Lepr/Bmp6	2
GO:0055074	calcium ion homeostasis	2/48	347/28564	0.115416	0.218715	0.132948	Drd1/Plch1	2
GO:0062197	cellular response to chemical stress	2/48	347/28564	0.115416	0.218715	0.132948	Prkg2/Nr4a2	2
GO:0071214	cellular response to abiotic stimulus	2/48	349/28564	0.116512	0.220009	0.133734	Piezo1/Prkg2	2
GO:0104004	cellular response to environmental stimulus	2/48	349/28564	0.116512	0.220009	0.133734	Piezo1/Prkg2	2
GO:0045787	positive regulation of cell cycle	2/48	350/28564	0.117061	0.220654	0.134126	Ccn2/Ncapd2	2
GO:0008202	steroid metabolic process	2/48	351/28564	0.11761	0.221298	0.134518	Lepr/Bmp6	2
GO:0001933	negative regulation of protein phosphorylation	2/48	354/28564	0.119263	0.223224	0.135689	Drd1/Bmp7	2
GO:0046651	lymphocyte proliferation	2/48	354/28564	0.119263	0.223224	0.135689	Cd44/Mef2c	2
GO:0050878	regulation of body fluid levels	2/48	354/28564	0.119263	0.223224	0.135689	Npr3/Erbb4	2
GO:0050778	positive regulation of immune response	3/48	726/28564	0.122493	0.22864	0.138981	Cd44/A2m/Mef2c	3
GO:0032943	mononuclear cell proliferation	2/48	360/28564	0.122585	0.22864	0.138981	Cd44/Mef2c	2
GO:0009100	glycoprotein metabolic process	2/48	362/28564	0.123698	0.230312	0.139997	Tet1/Fut9	2
GO:0010564	regulation of cell cycle process	3/48	731/28564	0.124341	0.231106	0.140479	Ccn2/Bmp7/Ncapd2	3
GO:0051235	maintenance of location	2/48	364/28564	0.124814	0.231579	0.140767	Drd1/Plch1	2
GO:0045861	negative regulation of proteolysis	2/48	368/28564	0.127052	0.235322	0.143042	Cd44/A2m	2
GO:0098662	inorganic cation transmembrane transport	3/48	741/28564	0.128068	0.236793	0.143937	Ccn2/Drd1/Plch1	3
GO:1904062	regulation of monoatomic cation transmembrane transport	2/48	371/28564	0.128737	0.237616	0.144437	Drd1/Chrna4	2
GO:0002460	adaptive immune response based on somatic recombination of immune receptors built from immunoglobulin superfamily domains	2/48	373/28564	0.129863	0.23928	0.145448	Mef2c/Ctsc	2
GO:0007517	muscle organ development	2/48	377/28564	0.132123	0.242187	0.147215	Klf5/Mef2c	2
GO:0060271	cilium assembly	2/48	377/28564	0.132123	0.242187	0.147215	Fnbp1l/Dcx	2
GO:0062012	regulation of small molecule metabolic process	2/48	377/28564	0.132123	0.242187	0.147215	Lepr/Bmp6	2
GO:0043010	camera-type eye development	2/48	378/28564	0.132689	0.242807	0.147592	Bmp7/Dcx	2
GO:0051962	positive regulation of nervous system development	2/48	379/28564	0.133256	0.243426	0.147969	Reln/Dcx	2
GO:1903037	regulation of leukocyte cell-cell adhesion	2/48	380/28564	0.133823	0.244044	0.148344	Cd44/Fut9	2
GO:0045862	positive regulation of proteolysis	2/48	384/28564	0.136099	0.24777	0.150609	Ccn2/Ctsc	2
GO:0045786	negative regulation of cell cycle	2/48	385/28564	0.13667	0.248384	0.150982	Adcyap1/Bmp7	2
GO:0050900	leukocyte migration	2/48	386/28564	0.13724	0.248997	0.151355	Pdgfd/Fut9	2
GO:0048872	homeostasis of number of cells	2/48	391/28564	0.140103	0.253758	0.154249	Cd44/Mef2c	2
GO:0140694	non-membrane-bounded organelle assembly	2/48	392/28564	0.140677	0.254365	0.154618	Fhod3/Mef2c	2
GO:0019216	regulation of lipid metabolic process	2/48	393/28564	0.141252	0.254972	0.154986	Bmp6/Erbb4	2
GO:0032496	response to lipopolysaccharide	2/48	394/28564	0.141827	0.255577	0.155354	Bmp6/Mef2c	2
GO:0042326	negative regulation of phosphorylation	2/48	405/28564	0.148188	0.266138	0.161774	Drd1/Bmp7	2
GO:1901214	regulation of neuron death	2/48	405/28564	0.148188	0.266138	0.161774	Mef2c/Nr4a2	2
GO:0098660	inorganic ion transmembrane transport	3/48	797/28564	0.149663	0.267468	0.162583	Ccn2/Drd1/Plch1	3
GO:0002696	positive regulation of leukocyte activation	2/48	408/28564	0.149933	0.267468	0.162583	Mef2c/Ctsc	2
GO:0006979	response to oxidative stress	2/48	408/28564	0.149933	0.267468	0.162583	Chrna4/Nr4a2	2
GO:0044782	cilium organization	2/48	408/28564	0.149933	0.267468	0.162583	Fnbp1l/Dcx	2
GO:0002237	response to molecule of bacterial origin	2/48	414/28564	0.153436	0.27326	0.166103	Bmp6/Mef2c	2
GO:0035773	insulin secretion involved in cellular response to glucose stimulus	1/48	100/28564	0.15505	0.274755	0.167012	Lepr	1
GO:0051341	regulation of oxidoreductase activity	1/48	100/28564	0.15505	0.274755	0.167012	Npr3	1
GO:2001243	negative regulation of intrinsic apoptotic signaling pathway	1/48	100/28564	0.15505	0.274755	0.167012	Cd44	1
GO:0010586	miRNA metabolic process	1/48	101/28564	0.156475	0.275903	0.16771	Klf5	1
GO:0031507	heterochromatin formation	1/48	101/28564	0.156475	0.275903	0.16771	Tet1	1
GO:0060021	roof of mouth development	1/48	101/28564	0.156475	0.275903	0.16771	Mef2c	1
GO:0006304	DNA modification	1/48	102/28564	0.157897	0.276125	0.167845	Tet1	1
GO:0007229	integrin-mediated signaling pathway	1/48	102/28564	0.157897	0.276125	0.167845	Ccn2	1
GO:0019935	cyclic-nucleotide-mediated signaling	1/48	102/28564	0.157897	0.276125	0.167845	Adcyap1	1
GO:0050772	positive regulation of axonogenesis	1/48	102/28564	0.157897	0.276125	0.167845	Dcx	1
GO:2000117	negative regulation of cysteine-type endopeptidase activity	1/48	102/28564	0.157897	0.276125	0.167845	Cd44	1
GO:0006970	response to osmotic stress	1/48	103/28564	0.159317	0.277697	0.1688	Prkg2	1
GO:0043502	regulation of muscle adaptation	1/48	103/28564	0.159317	0.277697	0.1688	Mef2c	1
GO:0042158	lipoprotein biosynthetic process	1/48	104/28564	0.160735	0.278799	0.16947	Zdhhc22	1
GO:0046330	positive regulation of JNK cascade	1/48	104/28564	0.160735	0.278799	0.16947	Ccn2	1
GO:0070664	negative regulation of leukocyte proliferation	1/48	104/28564	0.160735	0.278799	0.16947	Cd44	1
GO:0021510	spinal cord development	1/48	105/28564	0.162151	0.280797	0.170685	Reln	1
GO:0001938	positive regulation of endothelial cell proliferation	1/48	106/28564	0.163564	0.281869	0.171337	Bmp6	1
GO:0006885	regulation of pH	1/48	106/28564	0.163564	0.281869	0.171337	Cckbr	1
GO:0090288	negative regulation of cellular response to growth factor stimulus	1/48	106/28564	0.163564	0.281869	0.171337	Vwc2l	1
GO:0001704	formation of primary germ layer	1/48	107/28564	0.164975	0.282927	0.17198	Bmp7	1
GO:0030203	glycosaminoglycan metabolic process	1/48	107/28564	0.164975	0.282927	0.17198	Cd44	1
GO:0030510	regulation of BMP signaling pathway	1/48	107/28564	0.164975	0.282927	0.17198	Vwc2l	1
GO:0006821	chloride transport	1/48	108/28564	0.166383	0.284094	0.172689	Prkg2	1
GO:0097061	dendritic spine organization	1/48	108/28564	0.166383	0.284094	0.172689	Reln	1
GO:0006886	intracellular protein transport	3/48	841/28564	0.167415	0.284094	0.172689	Drd1/Zdhhc22/Chm	3
GO:0032890	regulation of organic acid transport	1/48	109/28564	0.167789	0.284094	0.172689	Htr1b	1
GO:0042116	macrophage activation	1/48	109/28564	0.167789	0.284094	0.172689	Ctsc	1
GO:0046364	monosaccharide biosynthetic process	1/48	109/28564	0.167789	0.284094	0.172689	Lepr	1
GO:1904427	positive regulation of calcium ion transmembrane transport	1/48	109/28564	0.167789	0.284094	0.172689	Drd1	1
GO:2001252	positive regulation of chromosome organization	1/48	109/28564	0.167789	0.284094	0.172689	Ncapd2	1
GO:0032755	positive regulation of interleukin-6 production	1/48	110/28564	0.169193	0.284661	0.173033	Adcyap1	1
GO:0055013	cardiac muscle cell development	1/48	110/28564	0.169193	0.284661	0.173033	Fhod3	1
GO:0071901	negative regulation of protein serine/threonine kinase activity	1/48	110/28564	0.169193	0.284661	0.173033	Bmp7	1
GO:2000243	positive regulation of reproductive process	1/48	110/28564	0.169193	0.284661	0.173033	Sema3a	1
GO:0003300	cardiac muscle hypertrophy	1/48	111/28564	0.170594	0.285665	0.173644	Mef2c	1
GO:0032370	positive regulation of lipid transport	1/48	111/28564	0.170594	0.285665	0.173644	Bmp6	1
GO:0070828	heterochromatin organization	1/48	111/28564	0.170594	0.285665	0.173644	Tet1	1
GO:0001843	neural tube closure	1/48	112/28564	0.171994	0.285853	0.173758	Cobl	1
GO:0032642	regulation of chemokine production	1/48	112/28564	0.171994	0.285853	0.173758	Adcyap1	1
GO:0062014	negative regulation of small molecule metabolic process	1/48	112/28564	0.171994	0.285853	0.173758	Lepr	1
GO:0070227	lymphocyte apoptotic process	1/48	112/28564	0.171994	0.285853	0.173758	Cd44	1
GO:0009991	response to extracellular stimulus	2/48	447/28564	0.17298	0.285853	0.173758	Bmp6/Nr4a2	2
GO:1903706	regulation of hemopoiesis	2/48	447/28564	0.17298	0.285853	0.173758	Cd44/Mef2c	2
GO:0002027	regulation of heart rate	1/48	113/28564	0.173391	0.285853	0.173758	Sema3a	1
GO:0008630	intrinsic apoptotic signaling pathway in response to DNA damage	1/48	113/28564	0.173391	0.285853	0.173758	Cd44	1
GO:0045814	negative regulation of gene expression, epigenetic	1/48	113/28564	0.173391	0.285853	0.173758	Tet1	1
GO:0060606	tube closure	1/48	113/28564	0.173391	0.285853	0.173758	Cobl	1
GO:0019218	regulation of steroid metabolic process	1/48	114/28564	0.174785	0.285939	0.17381	Bmp6	1
GO:0030516	regulation of axon extension	1/48	114/28564	0.174785	0.285939	0.17381	Sema3a	1
GO:0032024	positive regulation of insulin secretion	1/48	114/28564	0.174785	0.285939	0.17381	Lepr	1
GO:0043473	pigmentation	1/48	114/28564	0.174785	0.285939	0.17381	Mef2c	1
GO:0050886	endocrine process	1/48	114/28564	0.174785	0.285939	0.17381	Bmp6	1
GO:0014897	striated muscle hypertrophy	1/48	115/28564	0.176177	0.286096	0.173906	Mef2c	1
GO:0016079	synaptic vesicle exocytosis	1/48	115/28564	0.176177	0.286096	0.173906	Htr1b	1
GO:0018107	peptidyl-threonine phosphorylation	1/48	115/28564	0.176177	0.286096	0.173906	Bmp7	1
GO:0032231	regulation of actin filament bundle assembly	1/48	115/28564	0.176177	0.286096	0.173906	Ccn2	1
GO:0002526	acute inflammatory response	1/48	116/28564	0.177567	0.286096	0.173906	Adcyap1	1
GO:0030038	contractile actin filament bundle assembly	1/48	116/28564	0.177567	0.286096	0.173906	Ccn2	1
GO:0043149	stress fiber assembly	1/48	116/28564	0.177567	0.286096	0.173906	Ccn2	1
GO:0043255	regulation of carbohydrate biosynthetic process	1/48	116/28564	0.177567	0.286096	0.173906	Lepr	1
GO:0043266	regulation of potassium ion transport	1/48	116/28564	0.177567	0.286096	0.173906	Adcyap1	1
GO:0045446	endothelial cell differentiation	1/48	116/28564	0.177567	0.286096	0.173906	Bmp6	1
GO:0000280	nuclear division	2/48	456/28564	0.178383	0.286167	0.173949	Bmp7/Ncapd2	2
GO:0014896	muscle hypertrophy	1/48	117/28564	0.178955	0.286167	0.173949	Mef2c	1
GO:0031532	actin cytoskeleton reorganization	1/48	117/28564	0.178955	0.286167	0.173949	Efs	1
GO:0043401	steroid hormone mediated signaling pathway	1/48	117/28564	0.178955	0.286167	0.173949	Bmp7	1
GO:0106027	neuron projection organization	1/48	117/28564	0.178955	0.286167	0.173949	Reln	1
GO:0001892	embryonic placenta development	1/48	118/28564	0.18034	0.286295	0.174027	Bmp7	1
GO:0007088	regulation of mitotic nuclear division	1/48	118/28564	0.18034	0.286295	0.174027	Bmp7	1
GO:0010906	regulation of glucose metabolic process	1/48	118/28564	0.18034	0.286295	0.174027	Lepr	1
GO:0010959	regulation of metal ion transport	2/48	460/28564	0.180793	0.286295	0.174027	Drd1/Adcyap1	2
GO:0010563	negative regulation of phosphorus metabolic process	2/48	461/28564	0.181397	0.286295	0.174027	Drd1/Bmp7	2
GO:0045936	negative regulation of phosphate metabolic process	2/48	461/28564	0.181397	0.286295	0.174027	Drd1/Bmp7	2
GO:0070997	neuron death	2/48	461/28564	0.181397	0.286295	0.174027	Mef2c/Nr4a2	2
GO:0006939	smooth muscle contraction	1/48	119/28564	0.181724	0.286295	0.174027	Drd1	1
GO:0046634	regulation of alpha-beta T cell activation	1/48	119/28564	0.181724	0.286295	0.174027	Cd44	1
GO:0055006	cardiac cell development	1/48	119/28564	0.181724	0.286295	0.174027	Fhod3	1
GO:0006022	aminoglycan metabolic process	1/48	121/28564	0.184483	0.288509	0.175372	Cd44	1
GO:0032602	chemokine production	1/48	121/28564	0.184483	0.288509	0.175372	Adcyap1	1
GO:0032963	collagen metabolic process	1/48	121/28564	0.184483	0.288509	0.175372	Ccn2	1
GO:0042100	B cell proliferation	1/48	121/28564	0.184483	0.288509	0.175372	Mef2c	1
GO:1902106	negative regulation of leukocyte differentiation	1/48	121/28564	0.184483	0.288509	0.175372	Cd44	1
GO:0007498	mesoderm development	1/48	122/28564	0.185859	0.288964	0.175649	Bmp7	1
GO:0008585	female gonad development	1/48	122/28564	0.185859	0.288964	0.175649	Adcyap1	1
GO:0008637	apoptotic mitochondrial changes	1/48	122/28564	0.185859	0.288964	0.175649	Erbb4	1
GO:0071675	regulation of mononuclear cell migration	1/48	122/28564	0.185859	0.288964	0.175649	Pdgfd	1
GO:0038127	ERBB signaling pathway	1/48	123/28564	0.187233	0.290675	0.176689	Erbb4	1
GO:0018210	peptidyl-threonine modification	1/48	124/28564	0.188605	0.291108	0.176952	Bmp7	1
GO:0043534	blood vessel endothelial cell migration	1/48	124/28564	0.188605	0.291108	0.176952	Mef2c	1
GO:0045445	myoblast differentiation	1/48	124/28564	0.188605	0.291108	0.176952	Mef2c	1
GO:0051261	protein depolymerization	1/48	124/28564	0.188605	0.291108	0.176952	Vill	1
GO:0046545	development of primary female sexual characteristics	1/48	125/28564	0.189974	0.292374	0.177722	Adcyap1	1
GO:1903707	negative regulation of hemopoiesis	1/48	125/28564	0.189974	0.292374	0.177722	Cd44	1
GO:0048145	regulation of fibroblast proliferation	1/48	126/28564	0.191342	0.293629	0.178485	Pdgfd	1
GO:2000177	regulation of neural precursor cell proliferation	1/48	126/28564	0.191342	0.293629	0.178485	Adcyap1	1
GO:0030098	lymphocyte differentiation	2/48	478/28564	0.191701	0.293688	0.17852	Lepr/Cd44	2
GO:0035710	CD4-positive, alpha-beta T cell activation	1/48	127/28564	0.192706	0.293688	0.17852	Cd44	1
GO:0033993	response to lipid	3/48	904/28564	0.19386	0.293688	0.17852	Bmp7/Bmp6/Mef2c	3
GO:0003279	cardiac septum development	1/48	128/28564	0.194069	0.293688	0.17852	Bmp7	1
GO:0006575	cellular modified amino acid metabolic process	1/48	128/28564	0.194069	0.293688	0.17852	Reln	1
GO:0030048	actin filament-based movement	1/48	128/28564	0.194069	0.293688	0.17852	Fnbp1l	1
GO:0032006	regulation of TOR signaling	1/48	128/28564	0.194069	0.293688	0.17852	Reln	1
GO:0035303	regulation of dephosphorylation	1/48	128/28564	0.194069	0.293688	0.17852	Mef2c	1
GO:0043280	positive regulation of cysteine-type endopeptidase activity involved in apoptotic process	1/48	128/28564	0.194069	0.293688	0.17852	Ccn2	1
GO:0002253	activation of immune response	2/48	482/28564	0.194137	0.293688	0.17852	A2m/Mef2c	2
GO:0021782	glial cell development	1/48	129/28564	0.19543	0.29394	0.178673	Drd1	1
GO:0042476	odontogenesis	1/48	129/28564	0.19543	0.29394	0.178673	Bmp7	1
GO:0048640	negative regulation of developmental growth	1/48	129/28564	0.19543	0.29394	0.178673	Sema3a	1
GO:0002831	regulation of response to biotic stimulus	2/48	485/28564	0.195967	0.29394	0.178673	A2m/Bmp6	2
GO:0006914	autophagy	2/48	485/28564	0.195967	0.29394	0.178673	Lepr/Fnbp1l	2
GO:0061919	process utilizing autophagic mechanism	2/48	485/28564	0.195967	0.29394	0.178673	Lepr/Fnbp1l	2
GO:0033138	positive regulation of peptidyl-serine phosphorylation	1/48	130/28564	0.196788	0.29394	0.178673	Cd44	1
GO:0043500	muscle adaptation	1/48	130/28564	0.196788	0.29394	0.178673	Mef2c	1
GO:0051983	regulation of chromosome segregation	1/48	130/28564	0.196788	0.29394	0.178673	Ncapd2	1
GO:0001578	microtubule bundle formation	1/48	131/28564	0.198144	0.294314	0.178901	Dcx	1
GO:0048259	regulation of receptor-mediated endocytosis	1/48	131/28564	0.198144	0.294314	0.178901	Gsg1l	1
GO:0060048	cardiac muscle contraction	1/48	131/28564	0.198144	0.294314	0.178901	Ccn2	1
GO:1903052	positive regulation of proteolysis involved in protein catabolic process	1/48	131/28564	0.198144	0.294314	0.178901	Ctsc	1
GO:0032414	positive regulation of ion transmembrane transporter activity	1/48	132/28564	0.199497	0.295912	0.179872	Reln	1
GO:0019882	antigen processing and presentation	1/48	133/28564	0.200849	0.296677	0.180337	Erap1	1
GO:0043244	regulation of protein-containing complex disassembly	1/48	133/28564	0.200849	0.296677	0.180337	Vill	1
GO:0045807	positive regulation of endocytosis	1/48	133/28564	0.200849	0.296677	0.180337	Dcx	1
GO:0007368	determination of left/right symmetry	1/48	134/28564	0.202198	0.297432	0.180796	Mef2c	1
GO:1905954	positive regulation of lipid localization	1/48	134/28564	0.202198	0.297432	0.180796	Bmp6	1
GO:2000027	regulation of animal organ morphogenesis	1/48	134/28564	0.202198	0.297432	0.180796	Bmp7	1
GO:0003158	endothelium development	1/48	135/28564	0.203545	0.298914	0.181697	Bmp6	1
GO:0003014	renal system process	1/48	136/28564	0.20489	0.298914	0.181697	Npr3	1
GO:0009791	post-embryonic development	1/48	136/28564	0.20489	0.298914	0.181697	Nr4a2	1
GO:0017015	regulation of transforming growth factor beta receptor signaling pathway	1/48	136/28564	0.20489	0.298914	0.181697	Tet1	1
GO:0046467	membrane lipid biosynthetic process	1/48	136/28564	0.20489	0.298914	0.181697	Fut9	1
GO:0050868	negative regulation of T cell activation	1/48	136/28564	0.20489	0.298914	0.181697	Cd44	1
GO:0032874	positive regulation of stress-activated MAPK cascade	1/48	137/28564	0.206232	0.299233	0.181891	Ccn2	1
GO:0042157	lipoprotein metabolic process	1/48	137/28564	0.206232	0.299233	0.181891	Zdhhc22	1
GO:0046425	regulation of receptor signaling pathway via JAK-STAT	1/48	137/28564	0.206232	0.299233	0.181891	Erbb4	1
GO:0051592	response to calcium ion	1/48	137/28564	0.206232	0.299233	0.181891	Mef2c	1
GO:0001889	liver development	1/48	138/28564	0.207572	0.300662	0.18276	Cobl	1
GO:0002832	negative regulation of response to biotic stimulus	1/48	139/28564	0.208911	0.300662	0.18276	A2m	1
GO:0014013	regulation of gliogenesis	1/48	139/28564	0.208911	0.300662	0.18276	Adcyap1	1
GO:0070304	positive regulation of stress-activated protein kinase signaling cascade	1/48	139/28564	0.208911	0.300662	0.18276	Ccn2	1
GO:0099175	regulation of postsynapse organization	1/48	139/28564	0.208911	0.300662	0.18276	Reln	1
GO:1903844	regulation of cellular response to transforming growth factor beta stimulus	1/48	139/28564	0.208911	0.300662	0.18276	Tet1	1
GO:0009582	detection of abiotic stimulus	1/48	140/28564	0.210246	0.301247	0.183115	Piezo1	1
GO:0032411	positive regulation of transporter activity	1/48	140/28564	0.210246	0.301247	0.183115	Reln	1
GO:0060972	left/right pattern formation	1/48	140/28564	0.210246	0.301247	0.183115	Mef2c	1
GO:0033365	protein localization to organelle	3/48	944/28564	0.211182	0.301247	0.183115	Drd1/Bmp7/Erbb4	3
GO:0048285	organelle fission	2/48	510/28564	0.211304	0.301247	0.183115	Bmp7/Ncapd2	2
GO:0008360	regulation of cell shape	1/48	141/28564	0.21158	0.301247	0.183115	Arhgap18	1
GO:0009581	detection of external stimulus	1/48	141/28564	0.21158	0.301247	0.183115	Piezo1	1
GO:0061008	hepaticobiliary system development	1/48	141/28564	0.21158	0.301247	0.183115	Cobl	1
GO:0046165	alcohol biosynthetic process	1/48	142/28564	0.212912	0.302738	0.184022	Bmp6	1
GO:0031400	negative regulation of protein modification process	2/48	514/28564	0.21377	0.302876	0.184105	Drd1/Bmp7	2
GO:0002698	negative regulation of immune effector process	1/48	143/28564	0.214241	0.302876	0.184105	A2m	1
GO:0008584	male gonad development	1/48	143/28564	0.214241	0.302876	0.184105	Sema3a	1
GO:0009855	determination of bilateral symmetry	1/48	143/28564	0.214241	0.302876	0.184105	Mef2c	1
GO:0009799	specification of symmetry	1/48	144/28564	0.215568	0.302876	0.184105	Mef2c	1
GO:0030326	embryonic limb morphogenesis	1/48	144/28564	0.215568	0.302876	0.184105	Bmp7	1
GO:0035113	embryonic appendage morphogenesis	1/48	144/28564	0.215568	0.302876	0.184105	Bmp7	1
GO:0035270	endocrine system development	1/48	144/28564	0.215568	0.302876	0.184105	Bmp6	1
GO:0046546	development of primary male sexual characteristics	1/48	144/28564	0.215568	0.302876	0.184105	Sema3a	1
GO:1904892	regulation of receptor signaling pathway via STAT	1/48	145/28564	0.216893	0.304336	0.184993	Erbb4	1
GO:0006665	sphingolipid metabolic process	1/48	147/28564	0.219536	0.307235	0.186755	Fut9	1
GO:0048144	fibroblast proliferation	1/48	147/28564	0.219536	0.307235	0.186755	Pdgfd	1
GO:0008203	cholesterol metabolic process	1/48	148/28564	0.220854	0.30827	0.187384	Lepr	1
GO:0050864	regulation of B cell activation	1/48	148/28564	0.220854	0.30827	0.187384	Mef2c	1
GO:0051249	regulation of lymphocyte activation	2/48	528/28564	0.222424	0.310055	0.188469	Cd44/Mef2c	2
GO:0015698	inorganic anion transport	1/48	150/28564	0.223484	0.310719	0.188873	Prkg2	1
GO:0051928	positive regulation of calcium ion transport	1/48	150/28564	0.223484	0.310719	0.188873	Drd1	1
GO:0031929	TOR signaling	1/48	151/28564	0.224796	0.311729	0.189487	Reln	1
GO:1903038	negative regulation of leukocyte cell-cell adhesion	1/48	151/28564	0.224796	0.311729	0.189487	Cd44	1
GO:0046328	regulation of JNK cascade	1/48	152/28564	0.226106	0.31192	0.189603	Ccn2	1
GO:0050729	positive regulation of inflammatory response	1/48	152/28564	0.226106	0.31192	0.189603	Ctsc	1
GO:0051783	regulation of nuclear division	1/48	152/28564	0.226106	0.31192	0.189603	Bmp7	1
GO:2001257	regulation of cation channel activity	1/48	152/28564	0.226106	0.31192	0.189603	Chrna4	1
GO:0003231	cardiac ventricle development	1/48	153/28564	0.227413	0.312913	0.190207	Mef2c	1
GO:0050921	positive regulation of chemotaxis	1/48	153/28564	0.227413	0.312913	0.190207	Pdgfd	1
GO:0046660	female sex differentiation	1/48	155/28564	0.230022	0.315687	0.191893	Adcyap1	1
GO:0048593	camera-type eye morphogenesis	1/48	155/28564	0.230022	0.315687	0.191893	Bmp7	1
GO:0010638	positive regulation of organelle organization	2/48	541/28564	0.230489	0.315921	0.192035	Ccn2/Ncapd2	2
GO:0071333	cellular response to glucose stimulus	1/48	156/28564	0.231322	0.316656	0.192482	Lepr	1
GO:0050671	positive regulation of lymphocyte proliferation	1/48	157/28564	0.232621	0.318025	0.193314	Mef2c	1
GO:0010720	positive regulation of cell development	2/48	546/28564	0.233596	0.318164	0.193399	Reln/Dcx	2
GO:0001837	epithelial to mesenchymal transition	1/48	158/28564	0.233918	0.318164	0.193399	Bmp7	1
GO:0071331	cellular response to hexose stimulus	1/48	158/28564	0.233918	0.318164	0.193399	Lepr	1
GO:2001056	positive regulation of cysteine-type endopeptidase activity	1/48	158/28564	0.233918	0.318164	0.193399	Ccn2	1
GO:0006820	monoatomic anion transport	1/48	159/28564	0.235212	0.31911	0.193973	Prkg2	1
GO:0071326	cellular response to monosaccharide stimulus	1/48	159/28564	0.235212	0.31911	0.193973	Lepr	1
GO:0010565	regulation of cellular ketone metabolic process	1/48	160/28564	0.236505	0.319237	0.19405	Bmp6	1
GO:0032946	positive regulation of mononuclear cell proliferation	1/48	160/28564	0.236505	0.319237	0.19405	Mef2c	1
GO:1901136	carbohydrate derivative catabolic process	1/48	160/28564	0.236505	0.319237	0.19405	Cd44	1
GO:1902652	secondary alcohol metabolic process	1/48	160/28564	0.236505	0.319237	0.19405	Lepr	1
GO:0001824	blastocyst development	1/48	161/28564	0.237795	0.319973	0.194498	Tet1	1
GO:1903305	regulation of regulated secretory pathway	1/48	161/28564	0.237795	0.319973	0.194498	Htr1b	1
GO:1902532	negative regulation of intracellular signal transduction	2/48	553/28564	0.237952	0.319973	0.194498	Cd44/Bmp7	2
GO:0002456	T cell mediated immunity	1/48	162/28564	0.239083	0.320281	0.194685	Ctsc	1
GO:0016125	sterol metabolic process	1/48	162/28564	0.239083	0.320281	0.194685	Lepr	1
GO:0072331	signal transduction by p53 class mediator	1/48	162/28564	0.239083	0.320281	0.194685	Cd44	1
GO:0007601	visual perception	1/48	163/28564	0.240369	0.321599	0.195487	Olfm2	1
GO:0002687	positive regulation of leukocyte migration	1/48	164/28564	0.241653	0.322507	0.196038	Pdgfd	1
GO:0033135	regulation of peptidyl-serine phosphorylation	1/48	164/28564	0.241653	0.322507	0.196038	Cd44	1
GO:0010977	negative regulation of neuron projection development	1/48	165/28564	0.242935	0.323812	0.196831	Sema3a	1
GO:0032368	regulation of lipid transport	1/48	166/28564	0.244214	0.324781	0.197421	Bmp6	1
GO:0001701	in utero embryonic development	2/48	565/28564	0.24543	0.324781	0.197421	Bmp7/Tet1	2
GO:0006865	amino acid transport	1/48	167/28564	0.245492	0.324781	0.197421	Htr1b	1
GO:0008037	cell recognition	1/48	167/28564	0.245492	0.324781	0.197421	Sema3a	1
GO:0050953	sensory perception of light stimulus	1/48	167/28564	0.245492	0.324781	0.197421	Olfm2	1
GO:0071322	cellular response to carbohydrate stimulus	1/48	167/28564	0.245492	0.324781	0.197421	Lepr	1
GO:0006937	regulation of muscle contraction	1/48	168/28564	0.246767	0.325659	0.197954	Ccn2	1
GO:0050680	negative regulation of epithelial cell proliferation	1/48	168/28564	0.246767	0.325659	0.197954	Mef2c	1
GO:0006694	steroid biosynthetic process	1/48	169/28564	0.24804	0.326127	0.198239	Bmp6	1
GO:0007009	plasma membrane organization	1/48	169/28564	0.24804	0.326127	0.198239	Fnbp1l	1
GO:0120254	olefinic compound metabolic process	1/48	169/28564	0.24804	0.326127	0.198239	Bmp6	1
GO:0044283	small molecule biosynthetic process	2/48	571/28564	0.249174	0.326991	0.198764	Lepr/Bmp6	2
GO:0032675	regulation of interleukin-6 production	1/48	170/28564	0.249311	0.326991	0.198764	Adcyap1	1
GO:0071383	cellular response to steroid hormone stimulus	1/48	171/28564	0.250581	0.328251	0.19953	Bmp7	1
GO:0002821	positive regulation of adaptive immune response	1/48	172/28564	0.251847	0.328698	0.199802	Cd44	1
GO:0051250	negative regulation of lymphocyte activation	1/48	172/28564	0.251847	0.328698	0.199802	Cd44	1
GO:2001235	positive regulation of apoptotic signaling pathway	1/48	172/28564	0.251847	0.328698	0.199802	Ctsc	1
GO:0006941	striated muscle contraction	1/48	173/28564	0.253112	0.329541	0.200314	Ccn2	1
GO:0051017	actin filament bundle assembly	1/48	173/28564	0.253112	0.329541	0.200314	Ccn2	1
GO:0042770	signal transduction in response to DNA damage	1/48	174/28564	0.254375	0.329975	0.200578	Cd44	1
GO:0071230	cellular response to amino acid stimulus	1/48	174/28564	0.254375	0.329975	0.200578	Pdgfd	1
GO:1904064	positive regulation of cation transmembrane transport	1/48	174/28564	0.254375	0.329975	0.200578	Drd1	1
GO:0001678	intracellular glucose homeostasis	1/48	175/28564	0.255636	0.330804	0.201082	Lepr	1
GO:0010675	regulation of cellular carbohydrate metabolic process	1/48	175/28564	0.255636	0.330804	0.201082	Lepr	1
GO:0007565	female pregnancy	1/48	176/28564	0.256894	0.331226	0.201338	A2m	1
GO:0061572	actin filament bundle organization	1/48	176/28564	0.256894	0.331226	0.201338	Ccn2	1
GO:0070665	positive regulation of leukocyte proliferation	1/48	176/28564	0.256894	0.331226	0.201338	Mef2c	1
GO:0010594	regulation of endothelial cell migration	1/48	177/28564	0.258151	0.331661	0.201603	Mef2c	1
GO:0050851	antigen receptor-mediated signaling pathway	1/48	178/28564	0.259405	0.331661	0.201603	Mef2c	1
GO:0005975	carbohydrate metabolic process	2/48	589/28564	0.260418	0.331661	0.201603	Lepr/Fut9	2
GO:0006606	protein import into nucleus	1/48	179/28564	0.260657	0.331661	0.201603	Drd1	1
GO:0007254	JNK cascade	1/48	179/28564	0.260657	0.331661	0.201603	Ccn2	1
GO:0010950	positive regulation of endopeptidase activity	1/48	179/28564	0.260657	0.331661	0.201603	Ccn2	1
GO:0019722	calcium-mediated signaling	1/48	179/28564	0.260657	0.331661	0.201603	Drd1	1
GO:0030902	hindbrain development	1/48	179/28564	0.260657	0.331661	0.201603	Bmp7	1
GO:0032635	interleukin-6 production	1/48	179/28564	0.260657	0.331661	0.201603	Adcyap1	1
GO:0035107	appendage morphogenesis	1/48	179/28564	0.260657	0.331661	0.201603	Bmp7	1
GO:0035108	limb morphogenesis	1/48	179/28564	0.260657	0.331661	0.201603	Bmp7	1
GO:0042552	myelination	1/48	180/28564	0.261908	0.332852	0.202326	Ctsc	1
GO:0001909	leukocyte mediated cytotoxicity	1/48	181/28564	0.263156	0.332852	0.202326	Ctsc	1
GO:0045766	positive regulation of angiogenesis	1/48	181/28564	0.263156	0.332852	0.202326	Erap1	1
GO:1904018	positive regulation of vasculature development	1/48	181/28564	0.263156	0.332852	0.202326	Erap1	1
GO:2001242	regulation of intrinsic apoptotic signaling pathway	1/48	181/28564	0.263156	0.332852	0.202326	Cd44	1
GO:0051302	regulation of cell division	1/48	182/28564	0.264402	0.33324	0.202563	Pdgfd	1
GO:0062013	positive regulation of small molecule metabolic process	1/48	182/28564	0.264402	0.33324	0.202563	Bmp6	1
GO:1902905	positive regulation of supramolecular fiber organization	1/48	182/28564	0.264402	0.33324	0.202563	Ccn2	1
GO:0001890	placenta development	1/48	183/28564	0.265646	0.333624	0.202796	Bmp7	1
GO:0007272	ensheathment of neurons	1/48	183/28564	0.265646	0.333624	0.202796	Ctsc	1
GO:0008366	axon ensheathment	1/48	183/28564	0.265646	0.333624	0.202796	Ctsc	1
GO:0007219	Notch signaling pathway	1/48	184/28564	0.266888	0.334375	0.203252	Bmp7	1
GO:0051170	import into nucleus	1/48	184/28564	0.266888	0.334375	0.203252	Drd1	1
GO:0007369	gastrulation	1/48	185/28564	0.268128	0.334375	0.203252	Bmp7	1
GO:0009612	response to mechanical stimulus	1/48	185/28564	0.268128	0.334375	0.203252	Piezo1	1
GO:0048592	eye morphogenesis	1/48	185/28564	0.268128	0.334375	0.203252	Bmp7	1
GO:0071674	mononuclear cell migration	1/48	185/28564	0.268128	0.334375	0.203252	Pdgfd	1
GO:0060041	retina development in camera-type eye	1/48	186/28564	0.269366	0.335134	0.203714	Dcx	1
GO:0071897	DNA biosynthetic process	1/48	186/28564	0.269366	0.335134	0.203714	Ccn2	1
GO:0043409	negative regulation of MAPK cascade	1/48	187/28564	0.270602	0.336279	0.20441	Bmp7	1
GO:0045580	regulation of T cell differentiation	1/48	188/28564	0.271836	0.336634	0.204625	Cd44	1
GO:0071229	cellular response to acid chemical	1/48	188/28564	0.271836	0.336634	0.204625	Pdgfd	1
GO:1903531	negative regulation of secretion by cell	1/48	188/28564	0.271836	0.336634	0.204625	Htr1b	1
GO:0043200	response to amino acid	1/48	189/28564	0.273067	0.337374	0.205076	Pdgfd	1
GO:0050714	positive regulation of protein secretion	1/48	189/28564	0.273067	0.337374	0.205076	Lepr	1
GO:0000070	mitotic sister chromatid segregation	1/48	190/28564	0.274297	0.338501	0.20576	Ncapd2	1
GO:1901137	carbohydrate derivative biosynthetic process	2/48	613/28564	0.275425	0.338838	0.205965	Tet1/Fut9	2
GO:0006643	membrane lipid metabolic process	1/48	191/28564	0.275525	0.338838	0.205965	Fut9	1
GO:0046631	alpha-beta T cell activation	1/48	191/28564	0.275525	0.338838	0.205965	Cd44	1
GO:0051650	establishment of vesicle localization	1/48	193/28564	0.277974	0.341456	0.207557	Fnbp1l	1
GO:0042110	T cell activation	2/48	618/28564	0.278551	0.341771	0.207748	Lepr/Cd44	2
GO:1905952	regulation of lipid localization	1/48	196/28564	0.281632	0.345154	0.209804	Bmp6	1
GO:0051301	cell division	2/48	628/28564	0.284803	0.348638	0.211922	Pdgfd/Ncapd2	2
GO:0009749	response to glucose	1/48	199/28564	0.285273	0.348813	0.212028	Lepr	1
GO:0042129	regulation of T cell proliferation	1/48	201/28564	0.28769	0.350962	0.213335	Cd44	1
GO:1903169	regulation of calcium ion transmembrane transport	1/48	201/28564	0.28769	0.350962	0.213335	Drd1	1
GO:0007179	transforming growth factor beta receptor signaling pathway	1/48	202/28564	0.288895	0.351627	0.213739	Tet1	1
GO:0009746	response to hexose	1/48	202/28564	0.288895	0.351627	0.213739	Lepr	1
GO:0007259	receptor signaling pathway via JAK-STAT	1/48	203/28564	0.290099	0.351885	0.213896	Erbb4	1
GO:0010952	positive regulation of peptidase activity	1/48	203/28564	0.290099	0.351885	0.213896	Ccn2	1
GO:0032872	regulation of stress-activated MAPK cascade	1/48	203/28564	0.290099	0.351885	0.213896	Ccn2	1
GO:0002695	negative regulation of leukocyte activation	1/48	204/28564	0.2913	0.35214	0.214051	Cd44	1
GO:0040029	epigenetic regulation of gene expression	1/48	204/28564	0.2913	0.35214	0.214051	Tet1	1
GO:0051495	positive regulation of cytoskeleton organization	1/48	204/28564	0.2913	0.35214	0.214051	Ccn2	1
GO:0034284	response to monosaccharide	1/48	205/28564	0.2925	0.353189	0.214688	Lepr	1
GO:0070302	regulation of stress-activated protein kinase signaling cascade	1/48	206/28564	0.293697	0.354233	0.215323	Ccn2	1
GO:0006109	regulation of carbohydrate metabolic process	1/48	207/28564	0.294893	0.355273	0.215955	Lepr	1
GO:0030308	negative regulation of cell growth	1/48	208/28564	0.296086	0.355905	0.21634	Sema3a	1
GO:0031334	positive regulation of protein-containing complex assembly	1/48	208/28564	0.296086	0.355905	0.21634	Piezo1	1
GO:0030307	positive regulation of cell growth	1/48	210/28564	0.298468	0.357772	0.217475	Dcx	1
GO:0001101	response to acid chemical	1/48	211/28564	0.299655	0.357772	0.217475	Pdgfd	1
GO:0048736	appendage development	1/48	211/28564	0.299655	0.357772	0.217475	Bmp7	1
GO:0060173	limb development	1/48	211/28564	0.299655	0.357772	0.217475	Bmp7	1
GO:0097696	receptor signaling pathway via STAT	1/48	211/28564	0.299655	0.357772	0.217475	Erbb4	1
GO:0098742	cell-cell adhesion via plasma-membrane adhesion molecules	1/48	211/28564	0.299655	0.357772	0.217475	Mdga2	1
GO:0061351	neural precursor cell proliferation	1/48	212/28564	0.300841	0.358786	0.218091	Adcyap1	1
GO:0030705	cytoskeleton-dependent intracellular transport	1/48	213/28564	0.302025	0.359794	0.218704	Fnbp1l	1
GO:0002262	myeloid cell homeostasis	1/48	214/28564	0.303206	0.360396	0.219069	Cd44	1
GO:0051648	vesicle localization	1/48	214/28564	0.303206	0.360396	0.219069	Fnbp1l	1
GO:0051048	negative regulation of secretion	1/48	218/28564	0.307914	0.365583	0.222222	Htr1b	1
GO:0031345	negative regulation of cell projection organization	1/48	219/28564	0.309085	0.366566	0.22282	Sema3a	1
GO:0008654	phospholipid biosynthetic process	1/48	220/28564	0.310255	0.367136	0.223166	Erbb4	1
GO:0009743	response to carbohydrate	1/48	220/28564	0.310255	0.367136	0.223166	Lepr	1
GO:0050796	regulation of insulin secretion	1/48	221/28564	0.311424	0.368109	0.223758	Lepr	1
GO:0006006	glucose metabolic process	1/48	222/28564	0.31259	0.368669	0.224098	Lepr	1
GO:0045619	regulation of lymphocyte differentiation	1/48	222/28564	0.31259	0.368669	0.224098	Cd44	1
GO:1903050	regulation of proteolysis involved in protein catabolic process	1/48	225/28564	0.316076	0.372369	0.226347	Ctsc	1
GO:0017157	regulation of exocytosis	1/48	226/28564	0.317235	0.373321	0.226926	Htr1b	1
GO:0048469	cell maturation	1/48	227/28564	0.318391	0.373855	0.227251	Nr4a2	1
GO:0050866	negative regulation of cell activation	1/48	227/28564	0.318391	0.373855	0.227251	Cd44	1
GO:1903046	meiotic cell cycle process	1/48	229/28564	0.320699	0.37615	0.228646	Ncapd2	1
GO:0043542	endothelial cell migration	1/48	230/28564	0.321849	0.37667	0.228962	Mef2c	1
GO:0045216	cell-cell junction organization	1/48	230/28564	0.321849	0.37667	0.228962	Bmp6	1
GO:0099504	synaptic vesicle cycle	1/48	231/28564	0.322998	0.377599	0.229527	Htr1b	1
GO:0002822	regulation of adaptive immune response based on somatic recombination of immune receptors built from immunoglobulin superfamily domains	1/48	232/28564	0.324145	0.37811	0.229837	Mef2c	1
GO:0046034	ATP metabolic process	1/48	232/28564	0.324145	0.37811	0.229837	Adcyap1	1
GO:0009952	anterior/posterior pattern specification	1/48	233/28564	0.32529	0.379031	0.230397	Cobl	1
GO:0007160	cell-matrix adhesion	1/48	236/28564	0.328714	0.381767	0.23206	Ccn2	1
GO:0045637	regulation of myeloid cell differentiation	1/48	236/28564	0.328714	0.381767	0.23206	Mef2c	1
GO:0048545	response to steroid hormone	1/48	236/28564	0.328714	0.381767	0.23206	Bmp7	1
GO:0045930	negative regulation of mitotic cell cycle	1/48	238/28564	0.330987	0.383988	0.23341	Bmp7	1
GO:0006909	phagocytosis	1/48	240/28564	0.333252	0.385357	0.234242	Lepr	1
GO:0031330	negative regulation of cellular catabolic process	1/48	240/28564	0.333252	0.385357	0.234242	Lepr	1
GO:0032984	protein-containing complex disassembly	1/48	240/28564	0.333252	0.385357	0.234242	Vill	1
GO:0097529	myeloid leukocyte migration	1/48	242/28564	0.33551	0.387547	0.235574	Pdgfd	1
GO:0000819	sister chromatid segregation	1/48	243/28564	0.336637	0.387587	0.235598	Ncapd2	1
GO:0042098	T cell proliferation	1/48	243/28564	0.336637	0.387587	0.235598	Cd44	1
GO:0051403	stress-activated MAPK cascade	1/48	243/28564	0.336637	0.387587	0.235598	Ccn2	1
GO:0042180	cellular ketone metabolic process	1/48	244/28564	0.337761	0.388461	0.236129	Bmp6	1
GO:0006813	potassium ion transport	1/48	245/28564	0.338883	0.389332	0.236658	Adcyap1	1
GO:0033044	regulation of chromosome organization	1/48	246/28564	0.340004	0.389778	0.23693	Ncapd2	1
GO:0097305	response to alcohol	1/48	246/28564	0.340004	0.389778	0.23693	Htr1b	1
GO:0072593	reactive oxygen species metabolic process	1/48	249/28564	0.343354	0.393196	0.239007	Ccn2	1
GO:0001906	cell killing	1/48	250/28564	0.344468	0.394047	0.239525	Ctsc	1
GO:0099173	postsynapse organization	1/48	251/28564	0.345579	0.394894	0.24004	Reln	1
GO:0002252	immune effector process	2/48	731/28564	0.348729	0.397412	0.24157	A2m/Ctsc	2
GO:0043543	protein acylation	1/48	254/28564	0.348902	0.397412	0.24157	Zdhhc22	1
GO:0045055	regulated exocytosis	1/48	254/28564	0.348902	0.397412	0.24157	Htr1b	1
GO:0031098	stress-activated protein kinase signaling cascade	1/48	255/28564	0.350006	0.398244	0.242075	Ccn2	1
GO:0009205	purine ribonucleoside triphosphate metabolic process	1/48	256/28564	0.351108	0.398646	0.24232	Adcyap1	1
GO:0019318	hexose metabolic process	1/48	256/28564	0.351108	0.398646	0.24232	Lepr	1
GO:0080135	regulation of cellular response to stress	2/48	736/28564	0.351796	0.399002	0.242536	Ccn2/Cd44	2
GO:0043547	positive regulation of GTPase activity	1/48	259/28564	0.354403	0.401531	0.244074	Adcyap1	1
GO:0009144	purine nucleoside triphosphate metabolic process	1/48	262/28564	0.357682	0.404816	0.24607	Adcyap1	1
GO:0009199	ribonucleoside triphosphate metabolic process	1/48	263/28564	0.358772	0.405618	0.246558	Adcyap1	1
GO:0002274	myeloid leukocyte activation	1/48	264/28564	0.359859	0.406416	0.247043	Ctsc	1
GO:1903047	mitotic cell cycle process	2/48	754/28564	0.362798	0.40922	0.248748	Bmp7/Ncapd2	2
GO:0045926	negative regulation of growth	1/48	267/28564	0.363111	0.40922	0.248748	Sema3a	1
GO:0061024	membrane organization	2/48	762/28564	0.367668	0.413918	0.251603	Reln/Fnbp1l	2
GO:0002429	immune response-activating cell surface receptor signaling pathway	1/48	272/28564	0.368495	0.414411	0.251903	Mef2c	1
GO:0034599	cellular response to oxidative stress	1/48	276/28564	0.37277	0.418335	0.254288	Nr4a2	1
GO:0051091	positive regulation of DNA-binding transcription factor activity	1/48	276/28564	0.37277	0.418335	0.254288	Reln	1
GO:0002573	myeloid leukocyte differentiation	1/48	277/28564	0.373834	0.418956	0.254665	Mef2c	1
GO:0001894	tissue homeostasis	1/48	278/28564	0.374897	0.418956	0.254665	Ccn2	1
GO:0060249	anatomical structure homeostasis	1/48	278/28564	0.374897	0.418956	0.254665	Ccn2	1
GO:1903039	positive regulation of leukocyte cell-cell adhesion	1/48	278/28564	0.374897	0.418956	0.254665	Cd44	1
GO:0009141	nucleoside triphosphate metabolic process	1/48	281/28564	0.378074	0.422063	0.256554	Adcyap1	1
GO:0005996	monosaccharide metabolic process	1/48	282/28564	0.379129	0.422798	0.257001	Lepr	1
GO:0002768	immune response-regulating cell surface receptor signaling pathway	1/48	283/28564	0.380183	0.42353	0.257446	Mef2c	1
GO:0071375	cellular response to peptide hormone stimulus	1/48	289/28564	0.386469	0.430083	0.261429	Nr4a2	1
GO:0010506	regulation of autophagy	1/48	292/28564	0.389588	0.43265	0.26299	Lepr	1
GO:0051924	regulation of calcium ion transport	1/48	292/28564	0.389588	0.43265	0.26299	Drd1	1
GO:0042593	glucose homeostasis	1/48	295/28564	0.392692	0.435643	0.264809	Lepr	1
GO:0033500	carbohydrate homeostasis	1/48	296/28564	0.393723	0.436332	0.265228	Lepr	1
GO:0010948	negative regulation of cell cycle process	1/48	300/28564	0.397831	0.440426	0.267716	Bmp7	1
GO:0043414	macromolecule methylation	1/48	305/28564	0.402927	0.444681	0.270303	Tet1	1
GO:0045765	regulation of angiogenesis	1/48	305/28564	0.402927	0.444681	0.270303	Erap1	1
GO:0071695	anatomical structure maturation	1/48	305/28564	0.402927	0.444681	0.270303	Nr4a2	1
GO:0060326	cell chemotaxis	1/48	308/28564	0.405964	0.44757	0.272059	Pdgfd	1
GO:1901342	regulation of vasculature development	1/48	309/28564	0.406974	0.448218	0.272453	Erap1	1
GO:1990830	cellular response to leukemia inhibitory factor	1/48	311/28564	0.408987	0.44997	0.273518	Klf5	1
GO:1990823	response to leukemia inhibitory factor	1/48	312/28564	0.409991	0.450609	0.273906	Klf5	1
GO:2001020	regulation of response to DNA damage stimulus	1/48	313/28564	0.410993	0.451245	0.274293	Cd44	1
GO:0090596	sensory organ morphogenesis	1/48	319/28564	0.416973	0.457339	0.277997	Bmp7	1
GO:0097193	intrinsic apoptotic signaling pathway	1/48	322/28564	0.41994	0.46012	0.279687	Cd44	1
GO:0006974	cellular response to DNA damage stimulus	2/48	855/28564	0.423175	0.463188	0.281552	Cd44/Chrna4	2
GO:0009416	response to light stimulus	1/48	327/28564	0.424853	0.464547	0.282378	Drd1	1
GO:1901653	cellular response to peptide	1/48	334/28564	0.431663	0.471509	0.28661	Nr4a2	1
GO:0002833	positive regulation of response to biotic stimulus	1/48	335/28564	0.432629	0.47208	0.286958	Bmp6	1
GO:0009895	negative regulation of catabolic process	1/48	336/28564	0.433594	0.472165	0.287009	Lepr	1
GO:0050708	regulation of protein secretion	1/48	336/28564	0.433594	0.472165	0.287009	Lepr	1
GO:0098813	nuclear chromosome segregation	1/48	338/28564	0.435519	0.473777	0.287989	Ncapd2	1
GO:0051321	meiotic cell cycle	1/48	339/28564	0.436479	0.474337	0.288329	Ncapd2	1
GO:0016042	lipid catabolic process	1/48	342/28564	0.439349	0.475999	0.289339	Plch1	1
GO:0016311	dephosphorylation	1/48	342/28564	0.439349	0.475999	0.289339	Mef2c	1
GO:0051251	positive regulation of lymphocyte activation	1/48	342/28564	0.439349	0.475999	0.289339	Mef2c	1
GO:0051222	positive regulation of protein transport	1/48	343/28564	0.440303	0.476547	0.289673	Lepr	1
GO:0015980	energy derivation by oxidation of organic compounds	1/48	347/28564	0.444101	0.48017	0.291875	Lepr	1
GO:0006913	nucleocytoplasmic transport	1/48	352/28564	0.448813	0.484282	0.294375	Drd1	1
GO:0051169	nuclear transport	1/48	352/28564	0.448813	0.484282	0.294375	Drd1	1
GO:0043087	regulation of GTPase activity	1/48	353/28564	0.449751	0.484803	0.294691	Adcyap1	1
GO:0000278	mitotic cell cycle	2/48	902/28564	0.450323	0.484929	0.294768	Bmp7/Ncapd2	2
GO:0016050	vesicle organization	1/48	355/28564	0.451622	0.485346	0.295021	Fnbp1l	1
GO:0032259	methylation	1/48	355/28564	0.451622	0.485346	0.295021	Tet1	1
GO:0006338	chromatin remodeling	1/48	358/28564	0.454417	0.487857	0.296547	Tet1	1
GO:1902105	regulation of leukocyte differentiation	1/48	359/28564	0.455345	0.48787	0.296555	Cd44	1
GO:1904951	positive regulation of establishment of protein localization	1/48	359/28564	0.455345	0.48787	0.296555	Lepr	1
GO:0006644	phospholipid metabolic process	1/48	360/28564	0.456272	0.488372	0.29686	Erbb4	1
GO:0009617	response to bacterium	2/48	919/28564	0.459974	0.49184	0.298968	Bmp6/Mef2c	2
GO:0046942	carboxylic acid transport	1/48	367/28564	0.462717	0.494277	0.30045	Htr1b	1
GO:0015849	organic acid transport	1/48	369/28564	0.464545	0.495236	0.301033	Htr1b	1
GO:0031589	cell-substrate adhesion	1/48	369/28564	0.464545	0.495236	0.301033	Ccn2	1
GO:0002449	lymphocyte mediated immunity	1/48	372/28564	0.467275	0.497648	0.302499	Ctsc	1
GO:0006887	exocytosis	1/48	382/28564	0.476278	0.506729	0.308019	Htr1b	1
GO:0050863	regulation of T cell activation	1/48	384/28564	0.47806	0.508118	0.308863	Cd44	1
GO:0045088	regulation of innate immune response	1/48	385/28564	0.478949	0.508555	0.309129	A2m	1
GO:0043434	response to peptide hormone	1/48	386/28564	0.479837	0.50899	0.309394	Nr4a2	1
GO:0002757	immune response-activating signaling pathway	1/48	391/28564	0.484253	0.513163	0.31193	Mef2c	1
GO:0042060	wound healing	1/48	392/28564	0.485131	0.513583	0.312186	Cd44	1
GO:0002764	immune response-regulating signaling pathway	1/48	402/28564	0.493838	0.522282	0.317473	Mef2c	1
GO:0019637	organophosphate metabolic process	2/48	987/28564	0.497612	0.52575	0.319581	Adcyap1/Erbb4	2
GO:0071345	cellular response to cytokine stimulus	2/48	998/28564	0.503549	0.531496	0.323074	Lepr/Klf5	2
GO:0032504	multicellular organism reproduction	2/48	1000/28564	0.504624	0.532103	0.323443	Drd1/Cckbr	2
GO:0007059	chromosome segregation	1/48	429/28564	0.516633	0.54369	0.330486	Ncapd2	1
GO:0019221	cytokine-mediated signaling pathway	1/48	429/28564	0.516633	0.54369	0.330486	Lepr	1
GO:0009150	purine ribonucleotide metabolic process	1/48	434/28564	0.520742	0.547473	0.332786	Adcyap1	1
GO:0015711	organic anion transport	1/48	437/28564	0.523192	0.549506	0.334021	Htr1b	1
GO:0072594	establishment of protein localization to organelle	1/48	439/28564	0.524818	0.550437	0.334587	Drd1	1
GO:0044270	cellular nitrogen compound catabolic process	1/48	440/28564	0.525629	0.550437	0.334587	Tet1	1
GO:0046700	heterocycle catabolic process	1/48	440/28564	0.525629	0.550437	0.334587	Tet1	1
GO:0009314	response to radiation	1/48	444/28564	0.528859	0.553276	0.336313	Drd1	1
GO:0006869	lipid transport	1/48	447/28564	0.531268	0.554163	0.336852	Bmp6	1
GO:0051090	regulation of DNA-binding transcription factor activity	1/48	447/28564	0.531268	0.554163	0.336852	Reln	1
GO:1901652	response to peptide	1/48	447/28564	0.531268	0.554163	0.336852	Nr4a2	1
GO:0022411	cellular component disassembly	1/48	450/28564	0.533664	0.556118	0.33804	Vill	1
GO:0009259	ribonucleotide metabolic process	1/48	453/28564	0.536049	0.558057	0.339219	Adcyap1	1
GO:0051656	establishment of organelle localization	1/48	454/28564	0.536841	0.558336	0.339389	Fnbp1l	1
GO:0016055	Wnt signaling pathway	1/48	458/28564	0.539997	0.56107	0.34105	Cd44	1
GO:0198738	cell-cell signaling by wnt	1/48	460/28564	0.541566	0.562152	0.341709	Cd44	1
GO:0019439	aromatic compound catabolic process	1/48	461/28564	0.542349	0.562417	0.341869	Tet1	1
GO:0019693	ribose phosphate metabolic process	1/48	464/28564	0.544691	0.564295	0.343011	Adcyap1	1
GO:0002697	regulation of immune effector process	1/48	472/28564	0.550876	0.570149	0.346569	A2m	1
GO:0006091	generation of precursor metabolites and energy	1/48	478/28564	0.555461	0.574336	0.349115	Lepr	1
GO:0002443	leukocyte mediated immunity	1/48	480/28564	0.55698	0.575348	0.349729	Ctsc	1
GO:0030099	myeloid cell differentiation	1/48	482/28564	0.558493	0.576352	0.35034	Mef2c	1
GO:1901361	organic cyclic compound catabolic process	1/48	486/28564	0.561504	0.578898	0.351888	Tet1	1
GO:0010876	lipid localization	1/48	500/28564	0.571885	0.589031	0.358047	Bmp6	1
GO:0007346	regulation of mitotic cell cycle	1/48	510/28564	0.579153	0.59594	0.362246	Bmp7	1
GO:0001819	positive regulation of cytokine production	1/48	522/28564	0.587714	0.604166	0.367247	Adcyap1	1
GO:0006163	purine nucleotide metabolic process	1/48	524/28564	0.589124	0.605031	0.367773	Adcyap1	1
GO:0090407	organophosphate biosynthetic process	1/48	537/28564	0.598177	0.613736	0.373064	Erbb4	1
GO:0051052	regulation of DNA metabolic process	1/48	548/28564	0.605683	0.62084	0.377382	Tet1	1
GO:0009611	response to wounding	1/48	554/28564	0.60972	0.624377	0.379532	Cd44	1
GO:0010256	endomembrane system organization	1/48	555/28564	0.610389	0.624461	0.379583	Fnbp1l	1
GO:0072521	purine-containing compound metabolic process	1/48	559/28564	0.613053	0.626585	0.380874	Adcyap1	1
GO:0007005	mitochondrion organization	1/48	561/28564	0.614378	0.627337	0.381332	Erbb4	1
GO:0051276	chromosome organization	1/48	569/28564	0.619635	0.632099	0.384226	Ncapd2	1
GO:0006281	DNA repair	1/48	572/28564	0.621588	0.633485	0.385069	Chrna4	1
GO:0009117	nucleotide metabolic process	1/48	578/28564	0.625465	0.636827	0.3871	Adcyap1	1
GO:0006753	nucleoside phosphate metabolic process	1/48	585/28564	0.629939	0.640769	0.389497	Adcyap1	1
GO:0051223	regulation of protein transport	1/48	586/28564	0.630574	0.640803	0.389517	Lepr	1
GO:0034660	ncRNA metabolic process	1/48	589/28564	0.632472	0.642119	0.390317	Klf5	1
GO:0051640	organelle localization	1/48	596/28564	0.636865	0.645963	0.392653	Fnbp1l	1
GO:0006325	chromatin organization	1/48	612/28564	0.646711	0.655326	0.398345	Tet1	1
GO:0070201	regulation of establishment of protein localization	1/48	615/28564	0.648528	0.656543	0.399084	Lepr	1
GO:0051606	detection of stimulus	1/48	617/28564	0.649735	0.657139	0.399447	Piezo1	1
GO:0055086	nucleobase-containing small molecule metabolic process	1/48	637/28564	0.661576	0.668481	0.406341	Adcyap1	1
GO:0000226	microtubule cytoskeleton organization	1/48	651/28564	0.669631	0.675978	0.410899	Dcx	1
GO:0031329	regulation of cellular catabolic process	1/48	755/28564	0.723867	0.730036	0.443758	Lepr	1
GO:0051603	proteolysis involved in protein catabolic process	1/48	786/28564	0.738273	0.743861	0.452162	Ctsc	1
GO:0001817	regulation of cytokine production	1/48	819/28564	0.752801	0.757782	0.460623	Adcyap1	1
GO:0006518	peptide metabolic process	1/48	878/28564	0.776832	0.781233	0.474878	Erap1	1
GO:0001816	cytokine production	1/48	895/28564	0.783321	0.787015	0.478393	Adcyap1	1
GO:0045087	innate immune response	1/48	915/28564	0.790718	0.793699	0.482456	A2m	1
GO:0048609	multicellular organismal reproductive process	1/48	939/28564	0.79927	0.801528	0.487215	Cckbr	1
GO:0007017	microtubule-based process	1/48	961/28564	0.806807	0.808325	0.491347	Dcx	1
GO:0019953	sexual reproduction	1/48	969/28564	0.809479	0.81024	0.49251	Lepr	1
GO:0009894	regulation of catabolic process	1/48	977/28564	0.812114	0.812114	0.49365	Lepr	1
