# Supplementary material for: Peripheral substance P induces deficits in hippocampal synaptic plasticity and memory
Source: Mol Brain. 2025 Aug 16;18:69. doi: 10.1186/s13041-025-01242-6 (PMC12358064; doi:10.1186/s13041-025-01242-6)
Supplement: Supplementary file 3 — Supplementary Material 3: Gene Ontology pathway of down-regulated DEGs [file 13041_2025_1242_MOESM3_ESM.xlsx]

## Sheet: DOWN_GO_BP
ID	Description	GeneRatio	BgRatio	pvalue	p.adjust	qvalue	geneID	Count
GO:0031345	negative regulation of cell projection organization	5/28	219/28564	2.15432e-06	0.00126458	0.00101593	Mag/Plxnb3/Mbp/Sema5b/Klk8	5
GO:0051129	negative regulation of cellular component organization	7/28	757/28564	6.50529e-06	0.0019093	0.00153388	Mag/Bok/Hspa1b/Plxnb3/Mbp/Sema5b/Klk8	7
GO:0010977	negative regulation of neuron projection development	4/28	165/28564	1.97263e-05	0.00315079	0.00253125	Mag/Mbp/Sema5b/Klk8	4
GO:0007272	ensheathment of neurons	4/28	183/28564	2.95958e-05	0.00315079	0.00253125	Mag/Cldn11/Mbp/Klk8	4
GO:0008366	axon ensheathment	4/28	183/28564	2.95958e-05	0.00315079	0.00253125	Mag/Cldn11/Mbp/Klk8	4
GO:0050770	regulation of axonogenesis	4/28	187/28564	3.22057e-05	0.00315079	0.00253125	Mag/Plxnb3/Mbp/Sema5b	4
GO:0048812	neuron projection morphogenesis	6/28	726/28564	6.16912e-05	0.00474558	0.00381246	Mag/Plxnb3/Mbp/Sema5b/Klk8/Cpne9	6
GO:0120039	plasma membrane bounded cell projection morphogenesis	6/28	741/28564	6.90784e-05	0.00474558	0.00381246	Mag/Plxnb3/Mbp/Sema5b/Klk8/Cpne9	6
GO:0048858	cell projection morphogenesis	6/28	748/28564	7.27601e-05	0.00474558	0.00381246	Mag/Plxnb3/Mbp/Sema5b/Klk8/Cpne9	6
GO:0032990	cell part morphogenesis	6/28	772/28564	8.65948e-05	0.00508312	0.00408363	Mag/Plxnb3/Mbp/Sema5b/Klk8/Cpne9	6
GO:0061564	axon development	5/28	548/28564	0.00017407	0.00866553	0.00696164	Mag/Plxnb3/Mbp/Sema5b/Klk8	5
GO:0032989	cellular component morphogenesis	6/28	880/28564	0.000177149	0.00866553	0.00696164	Mag/Plxnb3/Mbp/Sema5b/Klk8/Cpne9	6
GO:0010975	regulation of neuron projection development	5/28	580/28564	0.000226475	0.00964818	0.00775107	Mag/Plxnb3/Mbp/Sema5b/Klk8	5
GO:0051960	regulation of nervous system development	5/28	582/28564	0.00023011	0.00964818	0.00775107	Mag/Plxnb3/Mbp/Sema5b/Klk8	5
GO:0022603	regulation of anatomical structure morphogenesis	6/28	955/28564	0.000275563	0.0107512	0.00863721	Mag/Plxnb3/Mbp/Ajap1/Sema5b/Cpne9	6
GO:0060284	regulation of cell development	6/28	966/28564	0.000293048	0.0107512	0.00863721	Mag/Hspa1b/Plxnb3/Mbp/Smarcd2/Sema5b	6
GO:0043086	negative regulation of catalytic activity	5/28	680/28564	0.000470112	0.0162327	0.0130409	Dbndd2/Hspa1b/Plxnb3/Hpca/Spink8	5
GO:0045862	positive regulation of proteolysis	4/28	384/28564	0.000509997	0.0166316	0.0133613	Bok/Cbfa2t3/Hspa1b/Mbp	4
GO:0050768	negative regulation of neurogenesis	3/28	173/28564	0.000639861	0.0197683	0.0158813	Mag/Mbp/Sema5b	3
GO:0051961	negative regulation of nervous system development	3/28	178/28564	0.000695023	0.0200673	0.0161215	Mag/Mbp/Sema5b	3
GO:0042552	myelination	3/28	180/28564	0.00071791	0.0200673	0.0161215	Mag/Mbp/Klk8	3
GO:0032102	negative regulation of response to external stimulus	4/28	429/28564	0.000772052	0.0205997	0.0165492	Sharpin/Ajap1/Sema5b/Klk8	4
GO:0120035	regulation of plasma membrane bounded cell projection organization	5/28	774/28564	0.000844401	0.0208287	0.0167332	Mag/Plxnb3/Mbp/Sema5b/Klk8	5
GO:0030162	regulation of proteolysis	5/28	779/28564	0.000869159	0.0208287	0.0167332	Bok/Cbfa2t3/Hspa1b/Mbp/Spink8	5
GO:0031344	regulation of cell projection organization	5/28	788/28564	0.000915091	0.0208287	0.0167332	Mag/Plxnb3/Mbp/Sema5b/Klk8	5
GO:0043524	negative regulation of neuron apoptotic process	3/28	199/28564	0.000959637	0.0208287	0.0167332	Mag/Bok/Crlf1	3
GO:0031644	regulation of nervous system process	3/28	204/28564	0.00103081	0.0208287	0.0167332	Mag/Homer3/Klk8	3
GO:0001558	regulation of cell growth	4/28	464/28564	0.00103307	0.0208287	0.0167332	Mag/Hspa1b/Sema5b/Cpne9	4
GO:0052547	regulation of peptidase activity	4/28	466/28564	0.00104964	0.0208287	0.0167332	Bok/Hspa1b/Mbp/Spink8	4
GO:0030308	negative regulation of cell growth	3/28	208/28564	0.0010901	0.0208287	0.0167332	Mag/Hspa1b/Sema5b	3
GO:1990138	neuron projection extension	3/28	209/28564	0.00110525	0.0208287	0.0167332	Mag/Sema5b/Cpne9	3
GO:0098742	cell-cell adhesion via plasma-membrane adhesion molecules	3/28	211/28564	0.00113595	0.0208287	0.0167332	Mag/Plxnb3/Mbp	3
GO:0050767	regulation of neurogenesis	4/28	480/28564	0.00117095	0.0208287	0.0167332	Mag/Plxnb3/Mbp/Sema5b	4
GO:0007409	axonogenesis	4/28	498/28564	0.00134101	0.0231521	0.0185998	Mag/Plxnb3/Mbp/Sema5b	4
GO:0016049	cell growth	4/28	558/28564	0.00203282	0.0340933	0.0273896	Mag/Hspa1b/Sema5b/Cpne9	4
GO:0045926	negative regulation of growth	3/28	267/28564	0.00222558	0.0362893	0.0291538	Mag/Hspa1b/Sema5b	3
GO:1901215	negative regulation of neuron death	3/28	273/28564	0.00237029	0.0376044	0.0302103	Mag/Bok/Crlf1	3
GO:0048588	developmental cell growth	3/28	287/28564	0.00273036	0.0421769	0.0338837	Mag/Sema5b/Cpne9	3
GO:0060560	developmental growth involved in morphogenesis	3/28	290/28564	0.00281167	0.0423193	0.0339981	Mag/Sema5b/Cpne9	3
GO:0043523	regulation of neuron apoptotic process	3/28	294/28564	0.0029224	0.0428861	0.0344535	Mag/Bok/Crlf1	3
GO:0006511	ubiquitin-dependent protein catabolic process	4/28	650/28564	0.00352391	0.0497365	0.0399569	Usp16/Cbfa2t3/Hspa1b/Sharpin	4
GO:0007162	negative regulation of cell adhesion	3/28	318/28564	0.00364339	0.0497365	0.0399569	Plxnb3/Mbp/Ajap1	3
GO:0010721	negative regulation of cell development	3/28	318/28564	0.00364339	0.0497365	0.0399569	Mag/Mbp/Sema5b	3
GO:0019941	modification-dependent protein catabolic process	4/28	662/28564	0.00376161	0.0501833	0.0403158	Usp16/Cbfa2t3/Hspa1b/Sharpin	4
GO:0048667	cell morphogenesis involved in neuron differentiation	4/28	671/28564	0.00394692	0.0509022	0.0408934	Mag/Plxnb3/Mbp/Sema5b	4
GO:0043632	modification-dependent macromolecule catabolic process	4/28	673/28564	0.00398893	0.0509022	0.0408934	Usp16/Cbfa2t3/Hspa1b/Sharpin	4
GO:0051402	neuron apoptotic process	3/28	337/28564	0.00428508	0.05286	0.0424662	Mag/Bok/Crlf1	3
GO:0006140	regulation of nucleotide metabolic process	2/28	100/28564	0.00432245	0.05286	0.0424662	Cbfa2t3/Hpca	2
GO:2000060	positive regulation of ubiquitin-dependent protein catabolic process	2/28	106/28564	0.00484191	0.0580041	0.0465988	Cbfa2t3/Hspa1b	2
GO:0062014	negative regulation of small molecule metabolic process	2/28	112/28564	0.00538876	0.0584598	0.0469649	Cbfa2t3/Hpca	2
GO:0052548	regulation of endopeptidase activity	3/28	368/28564	0.00547209	0.0584598	0.0469649	Bok/Hspa1b/Mbp	3
GO:0040008	regulation of growth	4/28	737/28564	0.00549956	0.0584598	0.0469649	Mag/Hspa1b/Sema5b/Cpne9	4
GO:0051346	negative regulation of hydrolase activity	3/28	370/28564	0.00555478	0.0584598	0.0469649	Hspa1b/Plxnb3/Spink8	3
GO:0030516	regulation of axon extension	2/28	114/28564	0.00557708	0.0584598	0.0469649	Mag/Sema5b	2
GO:0035967	cellular response to topologically incorrect protein	2/28	114/28564	0.00557708	0.0584598	0.0469649	Bok/Hspa1b	2
GO:1901800	positive regulation of proteasomal protein catabolic process	2/28	114/28564	0.00557708	0.0584598	0.0469649	Cbfa2t3/Hspa1b	2
GO:0000904	cell morphogenesis involved in differentiation	4/28	757/28564	0.00604088	0.0613412	0.0492798	Mag/Plxnb3/Mbp/Sema5b	4
GO:0006986	response to unfolded protein	2/28	119/28564	0.00606097	0.0613412	0.0492798	Bok/Hspa1b	2
GO:0051603	proteolysis involved in protein catabolic process	4/28	786/28564	0.00688771	0.0659035	0.052945	Usp16/Cbfa2t3/Hspa1b/Sharpin	4
GO:0048640	negative regulation of developmental growth	2/28	129/28564	0.00708423	0.0659035	0.052945	Mag/Sema5b	2
GO:0061387	regulation of extent of cell growth	2/28	129/28564	0.00708423	0.0659035	0.052945	Mag/Sema5b	2
GO:0048638	regulation of developmental growth	3/28	405/28564	0.00712556	0.0659035	0.052945	Mag/Sema5b/Cpne9	3
GO:1901214	regulation of neuron death	3/28	405/28564	0.00712556	0.0659035	0.052945	Mag/Bok/Crlf1	3
GO:0043123	positive regulation of I-kappaB kinase/NF-kappaB signaling	2/28	130/28564	0.00719058	0.0659035	0.052945	Sharpin/Lurap1l	2
GO:1903052	positive regulation of proteolysis involved in protein catabolic process	2/28	131/28564	0.00729766	0.0659035	0.052945	Cbfa2t3/Hspa1b	2
GO:0051592	response to calcium ion	2/28	137/28564	0.00795532	0.0693986	0.0557528	Hpca/Cpne9	2
GO:0030155	regulation of cell adhesion	4/28	822/28564	0.00804483	0.0693986	0.0557528	Plxnb3/Mbp/Ajap1/Smarcd2	4
GO:0032434	regulation of proteasomal ubiquitin-dependent protein catabolic process	2/28	138/28564	0.00806744	0.0693986	0.0557528	Cbfa2t3/Hspa1b	2
GO:0045727	positive regulation of translation	2/28	139/28564	0.00818028	0.0693986	0.0557528	Rps6kb2/Usp16	2
GO:0019221	cytokine-mediated signaling pathway	3/28	429/28564	0.0083409	0.0693986	0.0557528	Hspa1b/Sharpin/Crlf1	3
GO:0043161	proteasome-mediated ubiquitin-dependent protein catabolic process	3/28	430/28564	0.00839403	0.0693986	0.0557528	Cbfa2t3/Hspa1b/Sharpin	3
GO:0035966	response to topologically incorrect protein	2/28	142/28564	0.00852308	0.0694497	0.0557939	Bok/Hspa1b	2
GO:0001959	regulation of cytokine-mediated signaling pathway	2/28	144/28564	0.00875516	0.0694497	0.0557939	Hspa1b/Sharpin	2
GO:0048675	axon extension	2/28	144/28564	0.00875516	0.0694497	0.0557939	Mag/Sema5b	2
GO:0022411	cellular component disassembly	3/28	450/28564	0.00949903	0.0743458	0.0597273	Bok/Sharpin/Smarcd2	3
GO:0060759	regulation of response to cytokine stimulus	2/28	154/28564	0.00995774	0.0749013	0.0601736	Hspa1b/Sharpin	2
GO:0010563	negative regulation of phosphorus metabolic process	3/28	461/28564	0.0101415	0.0749013	0.0601736	Dbndd2/Cbfa2t3/Hpca	3
GO:0045936	negative regulation of phosphate metabolic process	3/28	461/28564	0.0101415	0.0749013	0.0601736	Dbndd2/Cbfa2t3/Hpca	3
GO:0070997	neuron death	3/28	461/28564	0.0101415	0.0749013	0.0601736	Mag/Bok/Crlf1	3
GO:0098609	cell-cell adhesion	4/28	881/28564	0.010208	0.0749013	0.0601736	Mag/Plxnb3/Mbp/Smarcd2	4
GO:0031099	regeneration	2/28	161/28564	0.0108409	0.0785628	0.0631151	Mag/Klk8	2
GO:2000058	regulation of ubiquitin-dependent protein catabolic process	2/28	168/28564	0.0117575	0.0840973	0.0675614	Cbfa2t3/Hspa1b	2
GO:0034250	positive regulation of amide metabolic process	2/28	169/28564	0.0118911	0.0840973	0.0675614	Rps6kb2/Usp16	2
GO:0071248	cellular response to metal ion	2/28	176/28564	0.0128454	0.088626	0.0711996	Hpca/Cpne9	2
GO:0010498	proteasomal protein catabolic process	3/28	504/28564	0.0128937	0.088626	0.0711996	Cbfa2t3/Hspa1b/Sharpin	3
GO:1903034	regulation of response to wounding	2/28	177/28564	0.0129844	0.088626	0.0711996	Ajap1/Klk8	2
GO:0010950	positive regulation of endopeptidase activity	2/28	179/28564	0.0132644	0.0894963	0.0718987	Bok/Mbp	2
GO:0006163	purine nucleotide metabolic process	3/28	524/28564	0.0143064	0.0950443	0.0763558	Cbfa2t3/Hspa1b/Hpca	3
GO:0071356	cellular response to tumor necrosis factor	2/28	187/28564	0.0144105	0.0950443	0.0763558	Hspa1b/Sharpin	2
GO:0043066	negative regulation of apoptotic process	4/28	983/28564	0.0147852	0.0959509	0.0770842	Mag/Bok/Hspa1b/Crlf1	4
GO:0061136	regulation of proteasomal protein catabolic process	2/28	191/28564	0.0149991	0.0959509	0.0770842	Cbfa2t3/Hspa1b	2
GO:0045597	positive regulation of cell differentiation	4/28	988/28564	0.0150383	0.0959509	0.0770842	Mag/Hspa1b/Plxnb3/Smarcd2	4
GO:0043122	regulation of I-kappaB kinase/NF-kappaB signaling	2/28	194/28564	0.0154474	0.0964737	0.0775042	Sharpin/Lurap1l	2
GO:0044265	cellular macromolecule catabolic process	4/28	996/28564	0.0154489	0.0964737	0.0775042	Usp16/Cbfa2t3/Hspa1b/Sharpin	4
GO:1902075	cellular response to salt	2/28	197/28564	0.0159014	0.097582	0.0783945	Hpca/Cpne9	2
GO:0010720	positive regulation of cell development	3/28	546/28564	0.0159589	0.097582	0.0783945	Mag/Plxnb3/Smarcd2	3
GO:0009611	response to wounding	3/28	554/28564	0.0165856	0.100368	0.0806331	Mag/Ajap1/Klk8	3
GO:0010952	positive regulation of peptidase activity	2/28	203/28564	0.0168265	0.100457	0.080704	Bok/Mbp	2
GO:0072521	purine-containing compound metabolic process	3/28	559/28564	0.0169843	0.100457	0.080704	Cbfa2t3/Hspa1b/Hpca	3
GO:0051345	positive regulation of hydrolase activity	3/28	564/28564	0.0173883	0.100457	0.080704	Bok/Mbp/Hpca	3
GO:0034612	response to tumor necrosis factor	2/28	207/28564	0.0174558	0.100457	0.080704	Hspa1b/Sharpin	2
GO:0045732	positive regulation of protein catabolic process	2/28	207/28564	0.0174558	0.100457	0.080704	Cbfa2t3/Hspa1b	2
GO:0043281	regulation of cysteine-type endopeptidase activity involved in apoptotic process	2/28	211/28564	0.0180951	0.103125	0.0828474	Bok/Hspa1b	2
GO:0009117	nucleotide metabolic process	3/28	578/28564	0.0185486	0.104692	0.0841069	Cbfa2t3/Hspa1b/Hpca	3
GO:0006753	nucleoside phosphate metabolic process	3/28	585/28564	0.0191447	0.106533	0.0855853	Cbfa2t3/Hspa1b/Hpca	3
GO:0008361	regulation of cell size	2/28	218/28564	0.0192376	0.106533	0.0855853	Mag/Sema5b	2
GO:1903050	regulation of proteolysis involved in protein catabolic process	2/28	225/28564	0.0204099	0.111968	0.0899521	Cbfa2t3/Hspa1b	2
GO:0046034	ATP metabolic process	2/28	232/28564	0.0216116	0.117463	0.0943662	Cbfa2t3/Hspa1b	2
GO:0007249	I-kappaB kinase/NF-kappaB signaling	2/28	236/28564	0.0223113	0.120153	0.0965277	Sharpin/Lurap1l	2
GO:0097191	extrinsic apoptotic signaling pathway	2/28	242/28564	0.0233784	0.124583	0.100086	Bok/Hspa1b	2
GO:0000819	sister chromatid segregation	2/28	243/28564	0.0235582	0.124583	0.100086	Hspa1b/Smarcd2	2
GO:0055086	nucleobase-containing small molecule metabolic process	3/28	637/28564	0.0239069	0.125039	0.100453	Cbfa2t3/Hspa1b/Hpca	3
GO:2001234	negative regulation of apoptotic signaling pathway	2/28	246/28564	0.0241013	0.125039	0.100453	Bok/Hspa1b	2
GO:0071241	cellular response to inorganic substance	2/28	247/28564	0.0242835	0.125039	0.100453	Hpca/Cpne9	2
GO:2000116	regulation of cysteine-type endopeptidase activity	2/28	251/28564	0.025018	0.127224	0.102208	Bok/Hspa1b	2
GO:0007411	axon guidance	2/28	253/28564	0.0253886	0.127224	0.102208	Plxnb3/Sema5b	2
GO:0051259	protein complex oligomerization	2/28	254/28564	0.0255748	0.127224	0.102208	Bok/Usp16	2
GO:0097485	neuron projection guidance	2/28	254/28564	0.0255748	0.127224	0.102208	Plxnb3/Sema5b	2
GO:0009205	purine ribonucleoside triphosphate metabolic process	2/28	256/28564	0.0259488	0.128	0.102831	Cbfa2t3/Hspa1b	2
GO:0009144	purine nucleoside triphosphate metabolic process	2/28	262/28564	0.0270844	0.131236	0.105431	Cbfa2t3/Hspa1b	2
GO:0044057	regulation of system process	3/28	670/28564	0.0272357	0.131236	0.105431	Mag/Homer3/Klk8	3
GO:0009199	ribonucleoside triphosphate metabolic process	2/28	263/28564	0.0272756	0.131236	0.105431	Cbfa2t3/Hspa1b	2
GO:0010466	negative regulation of peptidase activity	2/28	267/28564	0.0280459	0.133845	0.107527	Hspa1b/Spink8	2
GO:0022604	regulation of cell morphogenesis	2/28	278/28564	0.0302094	0.143007	0.114888	Plxnb3/Cpne9	2
GO:0009141	nucleoside triphosphate metabolic process	2/28	281/28564	0.0308107	0.144687	0.116238	Cbfa2t3/Hspa1b	2
GO:0051924	regulation of calcium ion transport	2/28	292/28564	0.0330565	0.154001	0.12372	Hpca/Homer3	2
GO:0080135	regulation of cellular response to stress	3/28	736/28564	0.0346066	0.159953	0.128502	Bok/Smarcd2/Klk8	3
GO:0030855	epithelial cell differentiation	3/28	740/28564	0.0350837	0.160892	0.129256	Sharpin/Ajap1/Hapln2	3
GO:0045596	negative regulation of cell differentiation	3/28	748/28564	0.0360485	0.164034	0.131781	Mag/Mbp/Sema5b	3
GO:0010038	response to metal ion	2/28	309/28564	0.0366503	0.165363	0.132848	Hpca/Cpne9	2
GO:0031329	regulation of cellular catabolic process	3/28	755/28564	0.0369039	0.165363	0.132848	Bok/Cbfa2t3/Hspa1b	3
GO:0043043	peptide biosynthetic process	3/28	762/28564	0.0377699	0.167962	0.134936	Rps6kb2/Usp16/Carns1	3
GO:0050769	positive regulation of neurogenesis	2/28	318/28564	0.0386119	0.170415	0.136906	Mag/Plxnb3	2
GO:0098813	nuclear chromosome segregation	2/28	338/28564	0.043112	0.188856	0.151722	Hspa1b/Smarcd2	2
GO:1902074	response to salt	2/28	340/28564	0.0435725	0.18946	0.152206	Hpca/Cpne9	2
GO:0001817	regulation of cytokine production	3/28	819/28564	0.0452122	0.195144	0.156773	Hspa1b/Mbp/Homer3	3
GO:0048589	developmental growth	3/28	830/28564	0.0467277	0.200213	0.160845	Mag/Sema5b/Cpne9	3
GO:0040013	negative regulation of locomotion	2/28	360/28564	0.0482786	0.205359	0.164979	Plxnb3/Sema5b	2
GO:0042176	regulation of protein catabolic process	2/28	364/28564	0.0492415	0.207948	0.167059	Cbfa2t3/Hspa1b	2
GO:0045861	negative regulation of proteolysis	2/28	368/28564	0.0502114	0.209265	0.168118	Hspa1b/Spink8	2
GO:0006974	cellular response to DNA damage stimulus	3/28	855/28564	0.0502664	0.209265	0.168118	Bok/Usp16/Smarcd2	3
GO:0062012	regulation of small molecule metabolic process	2/28	377/28564	0.0524194	0.215701	0.173288	Cbfa2t3/Hpca	2
GO:0070647	protein modification by small protein conjugation or removal	3/28	871/28564	0.0525993	0.215701	0.173288	Usp16/Hspa1b/Sharpin	3
GO:0051962	positive regulation of nervous system development	2/28	379/28564	0.0529147	0.215701	0.173288	Mag/Plxnb3	2
GO:0006518	peptide metabolic process	3/28	878/28564	0.0536366	0.217136	0.174441	Rps6kb2/Usp16/Carns1	3
GO:0043604	amide biosynthetic process	3/28	883/28564	0.0543836	0.218652	0.175659	Rps6kb2/Usp16/Carns1	3
GO:0001816	cytokine production	3/28	895/28564	0.0561973	0.224407	0.180282	Hspa1b/Mbp/Homer3	3
GO:0000278	mitotic cell cycle	3/28	902/28564	0.0572689	0.227141	0.182478	Usp16/Hspa1b/Smarcd2	3
GO:0032535	regulation of cellular component size	2/28	404/28564	0.0592485	0.231684	0.186128	Mag/Sema5b	2
GO:0042326	negative regulation of phosphorylation	2/28	405/28564	0.0595071	0.231684	0.186128	Dbndd2/Cbfa2t3	2
GO:0030001	metal ion transport	3/28	917/28564	0.0595983	0.231684	0.186128	Hpca/Homer3/Kcng2	3
GO:0006417	regulation of translation	2/28	411/28564	0.0610676	0.235833	0.189462	Rps6kb2/Usp16	2
GO:2001233	regulation of apoptotic signaling pathway	2/28	424/28564	0.064497	0.247449	0.198794	Bok/Hspa1b	2
GO:0007059	chromosome segregation	2/28	429/28564	0.0658334	0.250936	0.201595	Hspa1b/Smarcd2	2
GO:0009150	purine ribonucleotide metabolic process	2/28	434/28564	0.0671792	0.254414	0.204389	Cbfa2t3/Hspa1b	2
GO:0031331	positive regulation of cellular catabolic process	2/28	438/28564	0.0682625	0.25686	0.206354	Cbfa2t3/Hspa1b	2
GO:0009894	regulation of catabolic process	3/28	977/28564	0.069363	0.259338	0.208345	Bok/Cbfa2t3/Hspa1b	3
GO:1903706	regulation of hemopoiesis	2/28	447/28564	0.0707216	0.262336	0.210753	Hspa1b/Smarcd2	2
GO:0019637	organophosphate metabolic process	3/28	987/28564	0.0710587	0.262336	0.210753	Cbfa2t3/Hspa1b/Hpca	3
GO:0006816	calcium ion transport	2/28	452/28564	0.0721005	0.263885	0.211998	Hpca/Homer3	2
GO:0009259	ribonucleotide metabolic process	2/28	453/28564	0.0723773	0.263885	0.211998	Cbfa2t3/Hspa1b	2
GO:0071345	cellular response to cytokine stimulus	3/28	998/28564	0.072946	0.264317	0.212344	Hspa1b/Sharpin/Crlf1	3
GO:0010959	regulation of metal ion transport	2/28	460/28564	0.0743252	0.267662	0.215032	Hpca/Homer3	2
GO:0019693	ribose phosphate metabolic process	2/28	464/28564	0.0754459	0.270041	0.216943	Cbfa2t3/Hspa1b	2
GO:0034248	regulation of amide metabolic process	2/28	473/28564	0.0779878	0.277447	0.222893	Rps6kb2/Usp16	2
GO:0030099	myeloid cell differentiation	2/28	482/28564	0.080557	0.284861	0.228849	Cbfa2t3/Hspa1b	2
GO:2000112	regulation of cellular macromolecule biosynthetic process	2/28	497/28564	0.0848982	0.298415	0.239738	Rps6kb2/Usp16	2
GO:0022407	regulation of cell-cell adhesion	2/28	503/28564	0.0866549	0.302776	0.243242	Mbp/Smarcd2	2
GO:0050673	epithelial cell proliferation	2/28	508/28564	0.0881273	0.306099	0.245911	Plxnb3/Klk8	2
GO:0031400	negative regulation of protein modification process	2/28	514/28564	0.0899044	0.31038	0.24935	Dbndd2/Hspa1b	2
GO:0001819	positive regulation of cytokine production	2/28	522/28564	0.0922908	0.31038	0.24935	Hspa1b/Mbp	2
GO:0006757	ATP generation from ADP	1/28	100/28564	0.0935723	0.31038	0.24935	Cbfa2t3	1
GO:0019226	transmission of nerve impulse	1/28	101/28564	0.0944639	0.31038	0.24935	Mag	1
GO:0014033	neural crest cell differentiation	1/28	102/28564	0.0953547	0.31038	0.24935	Sema5b	1
GO:0050772	positive regulation of axonogenesis	1/28	102/28564	0.0953547	0.31038	0.24935	Plxnb3	1
GO:2000117	negative regulation of cysteine-type endopeptidase activity	1/28	102/28564	0.0953547	0.31038	0.24935	Hspa1b	1
GO:0062207	regulation of pattern recognition receptor signaling pathway	1/28	103/28564	0.0962447	0.31038	0.24935	Hspa1b	1
GO:2001237	negative regulation of extrinsic apoptotic signaling pathway	1/28	103/28564	0.0962447	0.31038	0.24935	Hspa1b	1
GO:0009896	positive regulation of catabolic process	2/28	538/28564	0.0971201	0.31038	0.24935	Cbfa2t3/Hspa1b	2
GO:0033045	regulation of sister chromatid segregation	1/28	104/28564	0.0971338	0.31038	0.24935	Smarcd2	1
GO:0010638	positive regulation of organelle organization	2/28	541/28564	0.0980338	0.31038	0.24935	Bok/Hspa1b	2
GO:0001938	positive regulation of endothelial cell proliferation	1/28	106/28564	0.0989095	0.31038	0.24935	Plxnb3	1
GO:0001657	ureteric bud development	1/28	107/28564	0.0997961	0.31038	0.24935	Crlf1	1
GO:0010035	response to inorganic substance	2/28	549/28564	0.100483	0.31038	0.24935	Hpca/Cpne9	2
GO:0046031	ADP metabolic process	1/28	108/28564	0.100682	0.31038	0.24935	Cbfa2t3	1
GO:0007156	homophilic cell adhesion via plasma membrane adhesion molecules	1/28	109/28564	0.101567	0.31038	0.24935	Plxnb3	1
GO:0032755	positive regulation of interleukin-6 production	1/28	110/28564	0.102451	0.31038	0.24935	Mbp	1
GO:0072163	mesonephric epithelium development	1/28	110/28564	0.102451	0.31038	0.24935	Crlf1	1
GO:0072164	mesonephric tubule development	1/28	110/28564	0.102451	0.31038	0.24935	Crlf1	1
GO:0007006	mitochondrial membrane organization	1/28	111/28564	0.103334	0.31038	0.24935	Bok	1
GO:1905477	positive regulation of protein localization to membrane	1/28	111/28564	0.103334	0.31038	0.24935	Hpca	1
GO:0007005	mitochondrion organization	2/28	561/28564	0.104189	0.31038	0.24935	Bok/Sharpin	2
GO:0032642	regulation of chemokine production	1/28	112/28564	0.104216	0.31038	0.24935	Mbp	1
GO:0001823	mesonephros development	1/28	113/28564	0.105098	0.31038	0.24935	Crlf1	1
GO:0008630	intrinsic apoptotic signaling pathway in response to DNA damage	1/28	113/28564	0.105098	0.31038	0.24935	Bok	1
GO:0009135	purine nucleoside diphosphate metabolic process	1/28	113/28564	0.105098	0.31038	0.24935	Cbfa2t3	1
GO:0009179	purine ribonucleoside diphosphate metabolic process	1/28	113/28564	0.105098	0.31038	0.24935	Cbfa2t3	1
GO:0051276	chromosome organization	2/28	569/28564	0.106681	0.31038	0.24935	Hspa1b/Smarcd2	2
GO:1904035	regulation of epithelial cell apoptotic process	1/28	115/28564	0.106859	0.31038	0.24935	Bok	1
GO:0044283	small molecule biosynthetic process	2/28	571/28564	0.107306	0.31038	0.24935	Coq8a/Carns1	2
GO:0006165	nucleoside diphosphate phosphorylation	1/28	116/28564	0.107738	0.31038	0.24935	Cbfa2t3	1
GO:0045446	endothelial cell differentiation	1/28	116/28564	0.107738	0.31038	0.24935	Hapln2	1
GO:0045639	positive regulation of myeloid cell differentiation	1/28	116/28564	0.107738	0.31038	0.24935	Hspa1b	1
GO:0090066	regulation of anatomical structure size	2/28	574/28564	0.108247	0.31038	0.24935	Mag/Sema5b	2
GO:0120031	plasma membrane bounded cell projection assembly	2/28	582/28564	0.110765	0.31038	0.24935	Plxnb3/Aif1l	2
GO:0006413	translational initiation	1/28	120/28564	0.111245	0.31038	0.24935	Rps6kb2	1
GO:0046939	nucleotide phosphorylation	1/28	120/28564	0.111245	0.31038	0.24935	Cbfa2t3	1
GO:0010608	post-transcriptional regulation of gene expression	2/28	584/28564	0.111398	0.31038	0.24935	Rps6kb2/Usp16	2
GO:0032602	chemokine production	1/28	121/28564	0.11212	0.31038	0.24935	Mbp	1
GO:0008637	apoptotic mitochondrial changes	1/28	122/28564	0.112994	0.31038	0.24935	Bok	1
GO:0048709	oligodendrocyte differentiation	1/28	122/28564	0.112994	0.31038	0.24935	Mag	1
GO:0006612	protein targeting to membrane	1/28	123/28564	0.113868	0.31038	0.24935	Hpca	1
GO:0051225	spindle assembly	1/28	123/28564	0.113868	0.31038	0.24935	Hspa1b	1
GO:0030031	cell projection assembly	2/28	594/28564	0.114573	0.31038	0.24935	Plxnb3/Aif1l	2
GO:0009185	ribonucleoside diphosphate metabolic process	1/28	124/28564	0.11474	0.31038	0.24935	Cbfa2t3	1
GO:0045445	myoblast differentiation	1/28	124/28564	0.11474	0.31038	0.24935	Smarcd2	1
GO:0045582	positive regulation of T cell differentiation	1/28	124/28564	0.11474	0.31038	0.24935	Smarcd2	1
GO:0007052	mitotic spindle organization	1/28	125/28564	0.115612	0.311303	0.250092	Hspa1b	1
GO:0043280	positive regulation of cysteine-type endopeptidase activity involved in apoptotic process	1/28	128/28564	0.118221	0.312691	0.251207	Bok	1
GO:0021782	glial cell development	1/28	129/28564	0.11909	0.312691	0.251207	Mag	1
GO:0001952	regulation of cell-matrix adhesion	1/28	130/28564	0.119957	0.312691	0.251207	Ajap1	1
GO:0051983	regulation of chromosome segregation	1/28	130/28564	0.119957	0.312691	0.251207	Smarcd2	1
GO:0006325	chromatin organization	2/28	612/28564	0.12035	0.312691	0.251207	Usp16/Smarcd2	2
GO:0006090	pyruvate metabolic process	1/28	131/28564	0.120824	0.312691	0.251207	Cbfa2t3	1
GO:0031109	microtubule polymerization or depolymerization	1/28	131/28564	0.120824	0.312691	0.251207	Hspa1b	1
GO:0048259	regulation of receptor-mediated endocytosis	1/28	131/28564	0.120824	0.312691	0.251207	Hpca	1
GO:0010927	cellular component assembly involved in morphogenesis	1/28	132/28564	0.121689	0.312691	0.251207	Mag	1
GO:2000779	regulation of double-strand break repair	1/28	132/28564	0.121689	0.312691	0.251207	Smarcd2	1
GO:0099072	regulation of postsynaptic membrane neurotransmitter receptor levels	1/28	133/28564	0.122554	0.312691	0.251207	Hpca	1
GO:0045739	positive regulation of DNA repair	1/28	134/28564	0.123419	0.312691	0.251207	Smarcd2	1
GO:2000027	regulation of animal organ morphogenesis	1/28	134/28564	0.123419	0.312691	0.251207	Ajap1	1
GO:0003158	endothelium development	1/28	135/28564	0.124282	0.312691	0.251207	Hapln2	1
GO:0009636	response to toxic substance	1/28	136/28564	0.125144	0.312691	0.251207	Mbp	1
GO:0016579	protein deubiquitination	1/28	137/28564	0.126006	0.312691	0.251207	Usp16	1
GO:0061041	regulation of wound healing	1/28	137/28564	0.126006	0.312691	0.251207	Ajap1	1
GO:0006935	chemotaxis	2/28	633/28564	0.127182	0.312691	0.251207	Plxnb3/Sema5b	2
GO:0014013	regulation of gliogenesis	1/28	139/28564	0.127727	0.312691	0.251207	Mag	1
GO:0042330	taxis	2/28	635/28564	0.127838	0.312691	0.251207	Plxnb3/Sema5b	2
GO:0043269	regulation of monoatomic ion transport	2/28	635/28564	0.127838	0.312691	0.251207	Hpca/Homer3	2
GO:0009582	detection of abiotic stimulus	1/28	140/28564	0.128586	0.312691	0.251207	Sema5b	1
GO:0045621	positive regulation of lymphocyte differentiation	1/28	140/28564	0.128586	0.312691	0.251207	Smarcd2	1
GO:0008360	regulation of cell shape	1/28	141/28564	0.129445	0.312691	0.251207	Plxnb3	1
GO:0009581	detection of external stimulus	1/28	141/28564	0.129445	0.312691	0.251207	Sema5b	1
GO:0009132	nucleoside diphosphate metabolic process	1/28	143/28564	0.131159	0.315534	0.253491	Cbfa2t3	1
GO:0010821	regulation of mitochondrion organization	1/28	144/28564	0.132015	0.316297	0.254104	Bok	1
GO:0090316	positive regulation of intracellular protein transport	1/28	145/28564	0.13287	0.317052	0.25471	Hpca	1
GO:0097190	apoptotic signaling pathway	2/28	656/28564	0.134773	0.31999	0.25707	Bok/Hspa1b	2
GO:0010469	regulation of signaling receptor activity	1/28	149/28564	0.136283	0.31999	0.25707	Homer3	1
GO:1904019	epithelial cell apoptotic process	1/28	149/28564	0.136283	0.31999	0.25707	Bok	1
GO:0015698	inorganic anion transport	1/28	150/28564	0.137134	0.31999	0.25707	Slc26a10	1
GO:0031623	receptor internalization	1/28	151/28564	0.137984	0.31999	0.25707	Hpca	1
GO:0031929	TOR signaling	1/28	151/28564	0.137984	0.31999	0.25707	Rps6kb2	1
GO:2001257	regulation of cation channel activity	1/28	152/28564	0.138834	0.31999	0.25707	Hpca	1
GO:0050728	negative regulation of inflammatory response	1/28	153/28564	0.139682	0.31999	0.25707	Sharpin	1
GO:0001936	regulation of endothelial cell proliferation	1/28	154/28564	0.14053	0.31999	0.25707	Plxnb3	1
GO:0043467	regulation of generation of precursor metabolites and energy	1/28	154/28564	0.14053	0.31999	0.25707	Cbfa2t3	1
GO:0030218	erythrocyte differentiation	1/28	155/28564	0.141377	0.31999	0.25707	Hspa1b	1
GO:0072073	kidney epithelium development	1/28	155/28564	0.141377	0.31999	0.25707	Crlf1	1
GO:1902850	microtubule cytoskeleton organization involved in mitosis	1/28	156/28564	0.142223	0.31999	0.25707	Hspa1b	1
GO:0016567	protein ubiquitination	2/28	679/28564	0.142468	0.31999	0.25707	Hspa1b/Sharpin	2
GO:0006839	mitochondrial transport	1/28	157/28564	0.143069	0.31999	0.25707	Bok	1
GO:0030216	keratinocyte differentiation	1/28	158/28564	0.143914	0.31999	0.25707	Sharpin	1
GO:0051092	positive regulation of NF-kappaB transcription factor activity	1/28	158/28564	0.143914	0.31999	0.25707	Hspa1b	1
GO:2001056	positive regulation of cysteine-type endopeptidase activity	1/28	158/28564	0.143914	0.31999	0.25707	Bok	1
GO:0070646	protein modification by small protein removal	1/28	159/28564	0.144757	0.320651	0.257602	Usp16	1
GO:0007613	memory	1/28	162/28564	0.147284	0.321131	0.257987	Klk8	1
GO:0070507	regulation of microtubule cytoskeleton organization	1/28	162/28564	0.147284	0.321131	0.257987	Hspa1b	1
GO:0072331	signal transduction by p53 class mediator	1/28	162/28564	0.147284	0.321131	0.257987	Bok	1
GO:0007601	visual perception	1/28	163/28564	0.148125	0.321131	0.257987	Sema5b	1
GO:0016052	carbohydrate catabolic process	1/28	165/28564	0.149804	0.321131	0.257987	Cbfa2t3	1
GO:0002521	leukocyte differentiation	2/28	702/28564	0.150259	0.321131	0.257987	Cbfa2t3/Smarcd2	2
GO:0008037	cell recognition	1/28	167/28564	0.151479	0.321131	0.257987	Hspa1b	1
GO:0034101	erythrocyte homeostasis	1/28	167/28564	0.151479	0.321131	0.257987	Hspa1b	1
GO:0050953	sensory perception of light stimulus	1/28	167/28564	0.151479	0.321131	0.257987	Sema5b	1
GO:2000045	regulation of G1/S transition of mitotic cell cycle	1/28	167/28564	0.151479	0.321131	0.257987	Smarcd2	1
GO:0007043	cell-cell junction assembly	1/28	168/28564	0.152316	0.321131	0.257987	Cldn11	1
GO:0007338	single fertilization	1/28	168/28564	0.152316	0.321131	0.257987	Hspa1b	1
GO:0030856	regulation of epithelial cell differentiation	1/28	168/28564	0.152316	0.321131	0.257987	Ajap1	1
GO:2001236	regulation of extrinsic apoptotic signaling pathway	1/28	169/28564	0.153152	0.321131	0.257987	Hspa1b	1
GO:0006457	protein folding	1/28	170/28564	0.153987	0.321131	0.257987	Hspa1b	1
GO:0032675	regulation of interleukin-6 production	1/28	170/28564	0.153987	0.321131	0.257987	Mbp	1
GO:0001935	endothelial cell proliferation	1/28	171/28564	0.154821	0.321131	0.257987	Plxnb3	1
GO:0009266	response to temperature stimulus	1/28	171/28564	0.154821	0.321131	0.257987	Hspa1b	1
GO:2001235	positive regulation of apoptotic signaling pathway	1/28	172/28564	0.155655	0.321182	0.258029	Bok	1
GO:0051017	actin filament bundle assembly	1/28	173/28564	0.156487	0.321182	0.258029	Aif1l	1
GO:2001022	positive regulation of response to DNA damage stimulus	1/28	173/28564	0.156487	0.321182	0.258029	Smarcd2	1
GO:0010675	regulation of cellular carbohydrate metabolic process	1/28	175/28564	0.15815	0.323464	0.259862	Cbfa2t3	1
GO:0061572	actin filament bundle organization	1/28	176/28564	0.158981	0.324034	0.260319	Aif1l	1
GO:0010564	regulation of cell cycle process	2/28	731/28564	0.160208	0.324284	0.26052	Hspa1b/Smarcd2	2
GO:0032446	protein modification by small protein conjugation	2/28	731/28564	0.160208	0.324284	0.26052	Hspa1b/Sharpin	2
GO:0019722	calcium-mediated signaling	1/28	179/28564	0.161467	0.324426	0.260635	Homer3	1
GO:0032635	interleukin-6 production	1/28	179/28564	0.161467	0.324426	0.260635	Mbp	1
GO:0006412	translation	2/28	736/28564	0.161937	0.324426	0.260635	Rps6kb2/Usp16	2
GO:2001242	regulation of intrinsic apoptotic signaling pathway	1/28	181/28564	0.16312	0.325123	0.261194	Bok	1
GO:0098662	inorganic cation transmembrane transport	2/28	741/28564	0.163669	0.325123	0.261194	Hpca/Kcng2	2
GO:1902905	positive regulation of supramolecular fiber organization	1/28	182/28564	0.163946	0.325123	0.261194	Hspa1b	1
GO:0008285	negative regulation of cell population proliferation	2/28	747/28564	0.165752	0.325641	0.261611	Cbfa2t3/Hspa1b	2
GO:0007369	gastrulation	1/28	185/28564	0.166418	0.325641	0.261611	Mbp	1
GO:0098655	monoatomic cation transmembrane transport	2/28	752/28564	0.167493	0.325641	0.261611	Hpca/Kcng2	2
GO:0032388	positive regulation of intracellular transport	1/28	187/28564	0.168062	0.325641	0.261611	Hpca	1
GO:0051260	protein homooligomerization	1/28	187/28564	0.168062	0.325641	0.261611	Usp16	1
GO:1903047	mitotic cell cycle process	2/28	754/28564	0.16819	0.325641	0.261611	Hspa1b/Smarcd2	2
GO:0045580	regulation of T cell differentiation	1/28	188/28564	0.168883	0.325641	0.261611	Smarcd2	1
GO:0002221	pattern recognition receptor signaling pathway	1/28	189/28564	0.169703	0.325641	0.261611	Hspa1b	1
GO:0007051	spindle organization	1/28	189/28564	0.169703	0.325641	0.261611	Hspa1b	1
GO:0000070	mitotic sister chromatid segregation	1/28	190/28564	0.170522	0.325641	0.261611	Hspa1b	1
GO:0061024	membrane organization	2/28	762/28564	0.170983	0.325641	0.261611	Bok/Mbp	2
GO:0050731	positive regulation of peptidyl-tyrosine phosphorylation	1/28	192/28564	0.172159	0.325641	0.261611	Crlf1	1
GO:0009060	aerobic respiration	1/28	193/28564	0.172976	0.325641	0.261611	Cbfa2t3	1
GO:0010951	negative regulation of endopeptidase activity	1/28	193/28564	0.172976	0.325641	0.261611	Hspa1b	1
GO:1902806	regulation of cell cycle G1/S phase transition	1/28	193/28564	0.172976	0.325641	0.261611	Smarcd2	1
GO:0031347	regulation of defense response	2/28	768/28564	0.173083	0.325641	0.261611	Hspa1b/Sharpin	2
GO:0050821	protein stabilization	1/28	196/28564	0.175422	0.328986	0.264298	Hspa1b	1
GO:0002758	innate immune response-activating signaling pathway	1/28	200/28564	0.178673	0.329615	0.264803	Hspa1b	1
GO:1903169	regulation of calcium ion transmembrane transport	1/28	201/28564	0.179484	0.329615	0.264803	Hpca	1
GO:0007259	receptor signaling pathway via JAK-STAT	1/28	203/28564	0.181103	0.329615	0.264803	Crlf1	1
GO:0071824	protein-DNA complex subunit organization	1/28	203/28564	0.181103	0.329615	0.264803	Smarcd2	1
GO:0051495	positive regulation of cytoskeleton organization	1/28	204/28564	0.181911	0.329615	0.264803	Hspa1b	1
GO:1905475	regulation of protein localization to membrane	1/28	205/28564	0.182719	0.329615	0.264803	Hpca	1
GO:0098660	inorganic ion transmembrane transport	2/28	797/28564	0.1833	0.329615	0.264803	Hpca/Kcng2	2
GO:0006469	negative regulation of protein kinase activity	1/28	206/28564	0.183526	0.329615	0.264803	Dbndd2	1
GO:0032271	regulation of protein polymerization	1/28	206/28564	0.183526	0.329615	0.264803	Hspa1b	1
GO:0120032	regulation of plasma membrane bounded cell projection assembly	1/28	206/28564	0.183526	0.329615	0.264803	Plxnb3	1
GO:1901654	response to ketone	1/28	206/28564	0.183526	0.329615	0.264803	Mbp	1
GO:0006109	regulation of carbohydrate metabolic process	1/28	207/28564	0.184332	0.329615	0.264803	Cbfa2t3	1
GO:0071805	potassium ion transmembrane transport	1/28	207/28564	0.184332	0.329615	0.264803	Kcng2	1
GO:0031334	positive regulation of protein-containing complex assembly	1/28	208/28564	0.185138	0.329615	0.264803	Hspa1b	1
GO:0043491	protein kinase B signaling	1/28	209/28564	0.185942	0.329615	0.264803	Rps6kb2	1
GO:0060491	regulation of cell projection assembly	1/28	209/28564	0.185942	0.329615	0.264803	Plxnb3	1
GO:0030307	positive regulation of cell growth	1/28	210/28564	0.186746	0.329615	0.264803	Cpne9	1
GO:0022408	negative regulation of cell-cell adhesion	1/28	211/28564	0.187549	0.329615	0.264803	Mbp	1
GO:0097696	receptor signaling pathway via STAT	1/28	211/28564	0.187549	0.329615	0.264803	Crlf1	1
GO:1902107	positive regulation of leukocyte differentiation	1/28	211/28564	0.187549	0.329615	0.264803	Smarcd2	1
GO:1903708	positive regulation of hemopoiesis	1/28	211/28564	0.187549	0.329615	0.264803	Smarcd2	1
GO:0006282	regulation of DNA repair	1/28	213/28564	0.189153	0.330869	0.265811	Smarcd2	1
GO:0002262	myeloid cell homeostasis	1/28	214/28564	0.189954	0.330869	0.265811	Hspa1b	1
GO:0031396	regulation of protein ubiquitination	1/28	214/28564	0.189954	0.330869	0.265811	Hspa1b	1
GO:0097435	supramolecular fiber organization	2/28	818/28564	0.190757	0.331286	0.266145	Hspa1b/Aif1l	2
GO:0009566	fertilization	1/28	217/28564	0.192352	0.333069	0.267578	Hspa1b	1
GO:1902115	regulation of organelle assembly	1/28	218/28564	0.19315	0.333467	0.267898	Hspa1b	1
GO:0048639	positive regulation of developmental growth	1/28	220/28564	0.194743	0.335008	0.269136	Cpne9	1
GO:0048839	inner ear development	1/28	221/28564	0.195538	0.335008	0.269136	Hpca	1
GO:0034330	cell junction organization	2/28	832/28564	0.195754	0.335008	0.269136	Cldn11/Klk8	2
GO:0045619	regulation of lymphocyte differentiation	1/28	222/28564	0.196333	0.335022	0.269147	Smarcd2	1
GO:0001666	response to hypoxia	1/28	227/28564	0.200295	0.339807	0.272992	Cbfa2t3	1
GO:0033157	regulation of intracellular protein transport	1/28	227/28564	0.200295	0.339807	0.272992	Hpca	1
GO:0010810	regulation of cell-substrate adhesion	1/28	230/28564	0.202664	0.34087	0.273845	Ajap1	1
GO:0033673	negative regulation of kinase activity	1/28	230/28564	0.202664	0.34087	0.273845	Dbndd2	1
GO:0045216	cell-cell junction organization	1/28	230/28564	0.202664	0.34087	0.273845	Cldn11	1
GO:0000082	G1/S transition of mitotic cell cycle	1/28	231/28564	0.203452	0.341217	0.274124	Smarcd2	1
GO:0050920	regulation of chemotaxis	1/28	232/28564	0.204239	0.341318	0.274205	Sema5b	1
GO:0006164	purine nucleotide biosynthetic process	1/28	233/28564	0.205025	0.341318	0.274205	Hpca	1
GO:0002218	activation of innate immune response	1/28	236/28564	0.20738	0.341318	0.274205	Hspa1b	1
GO:0007160	cell-matrix adhesion	1/28	236/28564	0.20738	0.341318	0.274205	Ajap1	1
GO:0045637	regulation of myeloid cell differentiation	1/28	236/28564	0.20738	0.341318	0.274205	Hspa1b	1
GO:0048545	response to steroid hormone	1/28	236/28564	0.20738	0.341318	0.274205	Mbp	1
GO:0010976	positive regulation of neuron projection development	1/28	237/28564	0.208164	0.341318	0.274205	Plxnb3	1
GO:0050679	positive regulation of epithelial cell proliferation	1/28	237/28564	0.208164	0.341318	0.274205	Plxnb3	1
GO:0031503	protein-containing complex localization	1/28	239/28564	0.209728	0.341686	0.274501	Hpca	1
GO:0034220	monoatomic ion transmembrane transport	2/28	871/28564	0.209769	0.341686	0.274501	Hpca/Kcng2	2
GO:0032984	protein-containing complex disassembly	1/28	240/28564	0.210509	0.341686	0.274501	Smarcd2	1
GO:0072522	purine-containing compound biosynthetic process	1/28	241/28564	0.21129	0.341686	0.274501	Hpca	1
GO:0002064	epithelial cell development	1/28	242/28564	0.21207	0.341686	0.274501	Hapln2	1
GO:0000209	protein polyubiquitination	1/28	243/28564	0.212849	0.341686	0.274501	Sharpin	1
GO:0009913	epidermal cell differentiation	1/28	244/28564	0.213627	0.341686	0.274501	Sharpin	1
GO:0042180	cellular ketone metabolic process	1/28	244/28564	0.213627	0.341686	0.274501	Coq8a	1
GO:0045664	regulation of neuron differentiation	1/28	244/28564	0.213627	0.341686	0.274501	Mag	1
GO:0006813	potassium ion transport	1/28	245/28564	0.214404	0.341998	0.274751	Kcng2	1
GO:0033044	regulation of chromosome organization	1/28	246/28564	0.215181	0.342296	0.274991	Smarcd2	1
GO:0006402	mRNA catabolic process	1/28	248/28564	0.216732	0.342296	0.274991	Hspa1b	1
GO:0030100	regulation of endocytosis	1/28	248/28564	0.216732	0.342296	0.274991	Hpca	1
GO:0048762	mesenchymal cell differentiation	1/28	249/28564	0.217507	0.342296	0.274991	Sema5b	1
GO:1903320	regulation of protein modification by small protein conjugation or removal	1/28	249/28564	0.217507	0.342296	0.274991	Hspa1b	1
GO:0045333	cellular respiration	1/28	252/28564	0.219826	0.344101	0.276441	Cbfa2t3	1
GO:0050870	positive regulation of T cell activation	1/28	252/28564	0.219826	0.344101	0.276441	Smarcd2	1
GO:0036293	response to decreased oxygen levels	1/28	255/28564	0.222138	0.345876	0.277867	Cbfa2t3	1
GO:0043583	ear development	1/28	255/28564	0.222138	0.345876	0.277867	Hpca	1
GO:0048871	multicellular organismal-level homeostasis	2/28	910/28564	0.223898	0.347693	0.279327	Hspa1b/Mbp	2
GO:0044843	cell cycle G1/S phase transition	1/28	259/28564	0.225212	0.34816	0.279702	Smarcd2	1
GO:0034976	response to endoplasmic reticulum stress	1/28	260/28564	0.225978	0.34816	0.279702	Bok	1
GO:0090150	establishment of protein localization to membrane	1/28	260/28564	0.225978	0.34816	0.279702	Hpca	1
GO:0030522	intracellular receptor signaling pathway	1/28	261/28564	0.226744	0.348425	0.279915	Hspa1b	1
GO:0009165	nucleotide biosynthetic process	1/28	266/28564	0.230561	0.353367	0.283885	Hpca	1
GO:0031348	negative regulation of defense response	1/28	268/28564	0.232083	0.35365	0.284112	Sharpin	1
GO:0032886	regulation of microtubule-based process	1/28	268/28564	0.232083	0.35365	0.284112	Hspa1b	1
GO:0051348	negative regulation of transferase activity	1/28	269/28564	0.232843	0.35365	0.284112	Dbndd2	1
GO:0050730	regulation of peptidyl-tyrosine phosphorylation	1/28	270/28564	0.233602	0.35365	0.284112	Crlf1	1
GO:0099003	vesicle-mediated transport in synapse	1/28	271/28564	0.234361	0.35365	0.284112	Hpca	1
GO:1901293	nucleoside phosphate biosynthetic process	1/28	271/28564	0.234361	0.35365	0.284112	Hpca	1
GO:0006898	receptor-mediated endocytosis	1/28	273/28564	0.235875	0.355023	0.285215	Hpca	1
GO:0010001	glial cell differentiation	1/28	274/28564	0.236632	0.355238	0.285388	Mag	1
GO:0051091	positive regulation of DNA-binding transcription factor activity	1/28	276/28564	0.238142	0.355238	0.285388	Hspa1b	1
GO:0002573	myeloid leukocyte differentiation	1/28	277/28564	0.238896	0.355238	0.285388	Cbfa2t3	1
GO:0001894	tissue homeostasis	1/28	278/28564	0.23965	0.355238	0.285388	Mbp	1
GO:0060249	anatomical structure homeostasis	1/28	278/28564	0.23965	0.355238	0.285388	Mbp	1
GO:1903039	positive regulation of leukocyte cell-cell adhesion	1/28	278/28564	0.23965	0.355238	0.285388	Smarcd2	1
GO:0140014	mitotic nuclear division	1/28	280/28564	0.241154	0.356568	0.286456	Hspa1b	1
GO:0051258	protein polymerization	1/28	281/28564	0.241905	0.35678	0.286627	Hspa1b	1
GO:0007605	sensory perception of sound	1/28	282/28564	0.242656	0.35699	0.286795	Mbp	1
GO:0019953	sexual reproduction	2/28	969/28564	0.245432	0.359593	0.288887	Cldn11/Hspa1b	2
GO:0048863	stem cell differentiation	1/28	286/28564	0.245651	0.359593	0.288887	Sema5b	1
GO:0006605	protein targeting	1/28	290/28564	0.248634	0.362155	0.290945	Hpca	1
GO:0032412	regulation of monoatomic ion transmembrane transporter activity	1/28	290/28564	0.248634	0.362155	0.290945	Hpca	1
GO:0010506	regulation of autophagy	1/28	292/28564	0.250122	0.362628	0.291325	Bok	1
GO:0019752	carboxylic acid metabolic process	2/28	982/28564	0.250195	0.362628	0.291325	Cbfa2t3/Carns1	2
GO:0006401	RNA catabolic process	1/28	293/28564	0.250864	0.362703	0.291385	Hspa1b	1
GO:0019932	second-messenger-mediated signaling	1/28	295/28564	0.252348	0.363951	0.292388	Homer3	1
GO:0001818	negative regulation of cytokine production	1/28	296/28564	0.253088	0.364124	0.292527	Homer3	1
GO:0006302	double-strand break repair	1/28	297/28564	0.253828	0.364296	0.292665	Smarcd2	1
GO:0044262	cellular carbohydrate metabolic process	1/28	299/28564	0.255305	0.365523	0.29365	Cbfa2t3	1
GO:0022898	regulation of transmembrane transporter activity	1/28	303/28564	0.258252	0.368842	0.296317	Hpca	1
GO:0050807	regulation of synapse organization	1/28	305/28564	0.259721	0.37004	0.297279	Klk8	1
GO:0045089	positive regulation of innate immune response	1/28	306/28564	0.260455	0.370186	0.297397	Hspa1b	1
GO:0060326	cell chemotaxis	1/28	308/28564	0.26192	0.370283	0.297475	Plxnb3	1
GO:0046394	carboxylic acid biosynthetic process	1/28	310/28564	0.263382	0.370283	0.297475	Carns1	1
GO:0060485	mesenchyme development	1/28	310/28564	0.263382	0.370283	0.297475	Sema5b	1
GO:0031647	regulation of protein stability	1/28	311/28564	0.264112	0.370283	0.297475	Hspa1b	1
GO:0030336	negative regulation of cell migration	1/28	312/28564	0.264841	0.370283	0.297475	Plxnb3	1
GO:0016053	organic acid biosynthetic process	1/28	313/28564	0.265569	0.370283	0.297475	Carns1	1
GO:0050803	regulation of synapse structure or activity	1/28	313/28564	0.265569	0.370283	0.297475	Klk8	1
GO:2001020	regulation of response to DNA damage stimulus	1/28	313/28564	0.265569	0.370283	0.297475	Smarcd2	1
GO:0070482	response to oxygen levels	1/28	315/28564	0.267025	0.370814	0.297901	Cbfa2t3	1
GO:0006874	intracellular calcium ion homeostasis	1/28	316/28564	0.267751	0.370814	0.297901	Bok	1
GO:0032409	regulation of transporter activity	1/28	317/28564	0.268477	0.370814	0.297901	Hpca	1
GO:0050954	sensory perception of mechanical stimulus	1/28	317/28564	0.268477	0.370814	0.297901	Mbp	1
GO:0030198	extracellular matrix organization	1/28	322/28564	0.272096	0.371918	0.298788	Hapln2	1
GO:0097193	intrinsic apoptotic signaling pathway	1/28	322/28564	0.272096	0.371918	0.298788	Bok	1
GO:0045927	positive regulation of growth	1/28	323/28564	0.272817	0.371918	0.298788	Cpne9	1
GO:0043062	extracellular structure organization	1/28	324/28564	0.273538	0.371918	0.298788	Hapln2	1
GO:0045229	external encapsulating structure organization	1/28	324/28564	0.273538	0.371918	0.298788	Hapln2	1
GO:2000146	negative regulation of cell motility	1/28	325/28564	0.274259	0.371918	0.298788	Plxnb3	1
GO:0007611	learning or memory	1/28	326/28564	0.274978	0.371918	0.298788	Klk8	1
GO:0018108	peptidyl-tyrosine phosphorylation	1/28	326/28564	0.274978	0.371918	0.298788	Crlf1	1
GO:0051054	positive regulation of DNA metabolic process	1/28	326/28564	0.274978	0.371918	0.298788	Smarcd2	1
GO:0009416	response to light stimulus	1/28	327/28564	0.275697	0.372033	0.29888	Sema5b	1
GO:0018212	peptidyl-tyrosine modification	1/28	328/28564	0.276415	0.372146	0.298972	Crlf1	1
GO:0022409	positive regulation of cell-cell adhesion	1/28	330/28564	0.27785	0.372479	0.299239	Smarcd2	1
GO:0030217	T cell differentiation	1/28	331/28564	0.278566	0.372479	0.299239	Smarcd2	1
GO:0043588	skin development	1/28	331/28564	0.278566	0.372479	0.299239	Sharpin	1
GO:0002833	positive regulation of response to biotic stimulus	1/28	335/28564	0.281424	0.374693	0.301017	Hspa1b	1
GO:0001822	kidney development	1/28	336/28564	0.282136	0.374693	0.301017	Crlf1	1
GO:0009895	negative regulation of catabolic process	1/28	336/28564	0.282136	0.374693	0.301017	Cbfa2t3	1
GO:0032386	regulation of intracellular transport	1/28	338/28564	0.28356	0.375733	0.301853	Hpca	1
GO:0070588	calcium ion transmembrane transport	1/28	339/28564	0.284271	0.375826	0.301928	Hpca	1
GO:0051251	positive regulation of lymphocyte activation	1/28	342/28564	0.286399	0.376942	0.302824	Smarcd2	1
GO:1901990	regulation of mitotic cell cycle phase transition	1/28	342/28564	0.286399	0.376942	0.302824	Smarcd2	1
GO:0051222	positive regulation of protein transport	1/28	343/28564	0.287107	0.377028	0.302894	Hpca	1
GO:0015980	energy derivation by oxidation of organic compounds	1/28	347/28564	0.289932	0.379042	0.304512	Cbfa2t3	1
GO:0055074	calcium ion homeostasis	1/28	347/28564	0.289932	0.379042	0.304512	Bok	1
GO:0072001	renal system development	1/28	352/28564	0.293448	0.382787	0.30752	Crlf1	1
GO:0043087	regulation of GTPase activity	1/28	353/28564	0.294149	0.382851	0.307571	Plxnb3	1
GO:0001933	negative regulation of protein phosphorylation	1/28	354/28564	0.29485	0.382913	0.307622	Dbndd2	1
GO:0006338	chromatin remodeling	1/28	358/28564	0.297646	0.384895	0.309214	Smarcd2	1
GO:1902105	regulation of leukocyte differentiation	1/28	359/28564	0.298343	0.384895	0.309214	Smarcd2	1
GO:1904951	positive regulation of establishment of protein localization	1/28	359/28564	0.298343	0.384895	0.309214	Hpca	1
GO:0050890	cognition	1/28	364/28564	0.301819	0.388526	0.31213	Klk8	1
GO:0031589	cell-substrate adhesion	1/28	369/28564	0.305278	0.392119	0.315017	Ajap1	1
GO:1904062	regulation of monoatomic cation transmembrane transport	1/28	371/28564	0.306658	0.393031	0.315749	Hpca	1
GO:0050727	regulation of inflammatory response	1/28	377/28564	0.310779	0.397445	0.319296	Sharpin	1
GO:0042063	gliogenesis	1/28	378/28564	0.311464	0.397455	0.319304	Mag	1
GO:1903037	regulation of leukocyte cell-cell adhesion	1/28	380/28564	0.312831	0.398334	0.32001	Smarcd2	1
GO:0010639	negative regulation of organelle organization	1/28	381/28564	0.313514	0.398339	0.320014	Bok	1
GO:0050863	regulation of T cell activation	1/28	384/28564	0.315558	0.400066	0.321401	Smarcd2	1
GO:0045088	regulation of innate immune response	1/28	385/28564	0.316238	0.400066	0.321401	Hspa1b	1
GO:0042742	defense response to bacterium	1/28	386/28564	0.316918	0.400066	0.321401	Sharpin	1
GO:0008544	epidermis development	1/28	388/28564	0.318274	0.400884	0.322059	Sharpin	1
GO:0002757	immune response-activating signaling pathway	1/28	391/28564	0.320305	0.400884	0.322059	Hspa1b	1
GO:0048872	homeostasis of number of cells	1/28	391/28564	0.320305	0.400884	0.322059	Hspa1b	1
GO:0042060	wound healing	1/28	392/28564	0.32098	0.400884	0.322059	Ajap1	1
GO:0140694	non-membrane-bounded organelle assembly	1/28	392/28564	0.32098	0.400884	0.322059	Hspa1b	1
GO:1902903	regulation of supramolecular fiber organization	1/28	394/28564	0.322329	0.401714	0.322726	Hspa1b	1
GO:0002764	immune response-regulating signaling pathway	1/28	402/28564	0.3277	0.407542	0.327408	Hspa1b	1
GO:0002696	positive regulation of leukocyte activation	1/28	408/28564	0.331701	0.410777	0.330007	Smarcd2	1
GO:0034655	nucleobase-containing compound catabolic process	1/28	408/28564	0.331701	0.410777	0.330007	Hspa1b	1
GO:0007159	leukocyte cell-cell adhesion	1/28	420/28564	0.339634	0.419716	0.337188	Smarcd2	1
GO:0016570	histone modification	1/28	426/28564	0.343567	0.4236	0.340308	Usp16	1
GO:0050678	regulation of epithelial cell proliferation	1/28	427/28564	0.34422	0.4236	0.340308	Plxnb3	1
GO:0050867	positive regulation of cell activation	1/28	430/28564	0.346176	0.425116	0.341526	Smarcd2	1
GO:0043254	regulation of protein-containing complex assembly	1/28	435/28564	0.349423	0.428208	0.34401	Hspa1b	1
GO:1901987	regulation of cell cycle phase transition	1/28	437/28564	0.350718	0.428899	0.344565	Smarcd2	1
GO:0044270	cellular nitrogen compound catabolic process	1/28	440/28564	0.352655	0.429478	0.34503	Hspa1b	1
GO:0046700	heterocycle catabolic process	1/28	440/28564	0.352655	0.429478	0.34503	Hspa1b	1
GO:0009314	response to radiation	1/28	444/28564	0.355229	0.431717	0.346829	Sema5b	1
GO:0051090	regulation of DNA-binding transcription factor activity	1/28	447/28564	0.357153	0.433159	0.347988	Hspa1b	1
GO:0044772	mitotic cell cycle phase transition	1/28	450/28564	0.359072	0.434588	0.349136	Smarcd2	1
GO:0031349	positive regulation of defense response	1/28	452/28564	0.360348	0.435235	0.349656	Hspa1b	1
GO:0007015	actin filament organization	1/28	454/28564	0.361622	0.435877	0.350171	Aif1l	1
GO:0000280	nuclear division	1/28	456/28564	0.362893	0.436513	0.350682	Hspa1b	1
GO:0031346	positive regulation of cell projection organization	1/28	459/28564	0.364795	0.437903	0.351799	Plxnb3	1
GO:0019439	aromatic compound catabolic process	1/28	461/28564	0.36606	0.438525	0.352298	Hspa1b	1
GO:0001667	ameboidal-type cell migration	1/28	470/28564	0.371723	0.444402	0.35702	Sema5b	1
GO:0034329	cell junction assembly	1/28	477/28564	0.376093	0.447635	0.359618	Cldn11	1
GO:0006091	generation of precursor metabolites and energy	1/28	478/28564	0.376715	0.447635	0.359618	Cbfa2t3	1
GO:0030098	lymphocyte differentiation	1/28	478/28564	0.376715	0.447635	0.359618	Smarcd2	1
GO:0002253	activation of immune response	1/28	482/28564	0.379197	0.448978	0.360696	Hspa1b	1
GO:0002831	regulation of response to biotic stimulus	1/28	485/28564	0.381052	0.448978	0.360696	Hspa1b	1
GO:0006914	autophagy	1/28	485/28564	0.381052	0.448978	0.360696	Bok	1
GO:0061919	process utilizing autophagic mechanism	1/28	485/28564	0.381052	0.448978	0.360696	Bok	1
GO:1901361	organic cyclic compound catabolic process	1/28	486/28564	0.38167	0.448978	0.360696	Hspa1b	1
GO:0042391	regulation of membrane potential	1/28	488/28564	0.382902	0.449527	0.361137	Bok	1
GO:0034765	regulation of monoatomic ion transmembrane transport	1/28	492/28564	0.38536	0.45151	0.36273	Hpca	1
GO:0007346	regulation of mitotic cell cycle	1/28	510/28564	0.396306	0.462488	0.37155	Smarcd2	1
GO:0048285	organelle fission	1/28	510/28564	0.396306	0.462488	0.37155	Hspa1b	1
GO:0050906	detection of stimulus involved in sensory perception	1/28	515/28564	0.399313	0.465073	0.373626	Sema5b	1
GO:0045785	positive regulation of cell adhesion	1/28	517/28564	0.400511	0.465545	0.374005	Smarcd2	1
GO:1903829	positive regulation of protein localization	1/28	519/28564	0.401708	0.466013	0.374381	Hpca	1
GO:0051249	regulation of lymphocyte activation	1/28	528/28564	0.407063	0.471294	0.378624	Smarcd2	1
GO:0030003	intracellular monoatomic cation homeostasis	1/28	532/28564	0.409428	0.47285	0.379874	Bok	1
GO:1903131	mononuclear cell differentiation	1/28	533/28564	0.410018	0.47285	0.379874	Smarcd2	1
GO:0090407	organophosphate biosynthetic process	1/28	537/28564	0.412372	0.474632	0.381306	Hpca	1
GO:0006873	intracellular monoatomic ion homeostasis	1/28	542/28564	0.415302	0.476137	0.382515	Bok	1
GO:0051493	regulation of cytoskeleton organization	1/28	542/28564	0.415302	0.476137	0.382515	Hspa1b	1
GO:0044089	positive regulation of cellular component biogenesis	1/28	545/28564	0.417053	0.477213	0.383379	Hspa1b	1
GO:0044770	cell cycle phase transition	1/28	547/28564	0.418217	0.477349	0.383489	Smarcd2	1
GO:0051052	regulation of DNA metabolic process	1/28	548/28564	0.418799	0.477349	0.383489	Smarcd2	1
GO:0050808	synapse organization	1/28	550/28564	0.41996	0.477745	0.383807	Klk8	1
GO:1902532	negative regulation of intracellular signal transduction	1/28	553/28564	0.421698	0.478794	0.384649	Homer3	1
GO:0006281	DNA repair	1/28	572/28564	0.432586	0.490209	0.39382	Smarcd2	1
GO:0098771	inorganic ion homeostasis	1/28	578/28564	0.435984	0.493107	0.396148	Bok	1
GO:0006897	endocytosis	1/28	583/28564	0.4388	0.495322	0.397927	Hpca	1
GO:0051223	regulation of protein transport	1/28	586/28564	0.440483	0.495322	0.397927	Hpca	1
GO:0002009	morphogenesis of an epithelium	1/28	589/28564	0.442161	0.495322	0.397927	Ajap1	1
GO:0005975	carbohydrate metabolic process	1/28	589/28564	0.442161	0.495322	0.397927	Cbfa2t3	1
GO:0030335	positive regulation of cell migration	1/28	589/28564	0.442161	0.495322	0.397927	Sema5b	1
GO:0032103	positive regulation of response to external stimulus	1/28	593/28564	0.444391	0.496872	0.399172	Hspa1b	1
GO:0060627	regulation of vesicle-mediated transport	1/28	613/28564	0.455413	0.505746	0.406302	Hpca	1
GO:0045859	regulation of protein kinase activity	1/28	614/28564	0.455959	0.505746	0.406302	Dbndd2	1
GO:0070201	regulation of establishment of protein localization	1/28	615/28564	0.456504	0.505746	0.406302	Hpca	1
GO:2000147	positive regulation of cell motility	1/28	616/28564	0.457048	0.505746	0.406302	Sema5b	1
GO:0051606	detection of stimulus	1/28	617/28564	0.457592	0.505746	0.406302	Sema5b	1
GO:0042110	T cell activation	1/28	618/28564	0.458136	0.505746	0.406302	Smarcd2	1
GO:0043065	positive regulation of apoptotic process	1/28	619/28564	0.458679	0.505746	0.406302	Bok	1
GO:0072657	protein localization to membrane	1/28	620/28564	0.459221	0.505746	0.406302	Hpca	1
GO:0051301	cell division	1/28	628/28564	0.463541	0.509548	0.409356	Usp16	1
GO:0043068	positive regulation of programmed cell death	1/28	632/28564	0.465689	0.510586	0.41019	Bok	1
GO:0040017	positive regulation of locomotion	1/28	633/28564	0.466225	0.510586	0.41019	Sema5b	1
GO:0034762	regulation of transmembrane transport	1/28	636/28564	0.467828	0.511388	0.410834	Hpca	1
GO:0002694	regulation of leukocyte activation	1/28	641/28564	0.470491	0.51239	0.411639	Smarcd2	1
GO:0055080	monoatomic cation homeostasis	1/28	641/28564	0.470491	0.51239	0.411639	Bok	1
GO:0007423	sensory organ development	1/28	646/28564	0.473141	0.514321	0.413191	Hpca	1
GO:0000226	microtubule cytoskeleton organization	1/28	651/28564	0.475778	0.515849	0.414418	Hspa1b	1
GO:0050801	monoatomic ion homeostasis	1/28	652/28564	0.476303	0.515849	0.414418	Bok	1
GO:0007283	spermatogenesis	1/28	656/28564	0.478402	0.517167	0.415477	Cldn11	1
GO:0048598	embryonic morphogenesis	1/28	670/28564	0.485682	0.524073	0.421025	Mbp	1
GO:0048232	male gamete generation	1/28	678/28564	0.489798	0.527544	0.423814	Cldn11	1
GO:0032787	monocarboxylic acid metabolic process	1/28	691/28564	0.49642	0.533697	0.428757	Cbfa2t3	1
GO:0050865	regulation of cell activation	1/28	697/28564	0.499448	0.53597	0.430583	Smarcd2	1
GO:0048729	tissue morphogenesis	1/28	700/28564	0.500955	0.536607	0.431095	Ajap1	1
GO:0051668	localization within membrane	1/28	702/28564	0.501957	0.536701	0.43117	Hpca	1
GO:0010942	positive regulation of cell death	1/28	706/28564	0.503957	0.537859	0.432101	Bok	1
GO:0043549	regulation of kinase activity	1/28	711/28564	0.506445	0.539534	0.433446	Dbndd2	1
GO:0016071	mRNA metabolic process	1/28	726/28564	0.513837	0.545062	0.437887	Hspa1b	1
GO:0050778	positive regulation of immune response	1/28	726/28564	0.513837	0.545062	0.437887	Hspa1b	1
GO:0050804	modulation of chemical synaptic transmission	1/28	729/28564	0.515302	0.545062	0.437887	Homer3	1
GO:0099177	regulation of trans-synaptic signaling	1/28	730/28564	0.51579	0.545062	0.437887	Homer3	1
GO:0030036	actin cytoskeleton organization	1/28	731/28564	0.516277	0.545062	0.437887	Aif1l	1
GO:0055082	intracellular chemical homeostasis	1/28	741/28564	0.521122	0.54919	0.441203	Bok	1
GO:0061061	muscle structure development	1/28	754/28564	0.527351	0.554758	0.445676	Smarcd2	1
GO:0009725	response to hormone	1/28	773/28564	0.536314	0.562661	0.452026	Mbp	1
GO:0001934	positive regulation of protein phosphorylation	1/28	774/28564	0.536781	0.562661	0.452026	Crlf1	1
GO:0006954	inflammatory response	1/28	796/28564	0.546945	0.572229	0.459712	Sharpin	1
GO:0007610	behavior	1/28	798/28564	0.547858	0.572229	0.459712	Klk8	1
GO:0000165	MAPK cascade	1/28	813/28564	0.554651	0.578295	0.464586	Mbp	1
GO:0030029	actin filament-based process	1/28	816/28564	0.555998	0.578671	0.464888	Aif1l	1
GO:0007276	gamete generation	1/28	831/28564	0.562672	0.584582	0.469636	Cldn11	1
GO:0014070	response to organic cyclic compound	1/28	838/28564	0.565754	0.586037	0.470806	Mbp	1
GO:0051338	regulation of transferase activity	1/28	839/28564	0.566193	0.586037	0.470806	Dbndd2	1
GO:0006886	intracellular protein transport	1/28	841/28564	0.567069	0.586037	0.470806	Hpca	1
GO:0019725	cellular homeostasis	1/28	845/28564	0.568815	0.586676	0.471319	Bok	1
GO:0042327	positive regulation of phosphorylation	1/28	847/28564	0.569686	0.586676	0.471319	Crlf1	1
GO:0046649	lymphocyte activation	1/28	877/28564	0.582544	0.598868	0.481113	Smarcd2	1
GO:0033993	response to lipid	1/28	904/28564	0.5938	0.609371	0.489551	Mbp	1
GO:0050776	regulation of immune response	1/28	907/28564	0.595032	0.60957	0.489711	Hspa1b	1
GO:0045087	innate immune response	1/28	915/28564	0.598301	0.611851	0.491544	Hspa1b	1
GO:0009617	response to bacterium	1/28	919/28564	0.599926	0.612305	0.491908	Sharpin	1
GO:0007268	chemical synaptic transmission	1/28	924/28564	0.601948	0.612305	0.491908	Homer3	1
GO:0098916	anterograde trans-synaptic signaling	1/28	924/28564	0.601948	0.612305	0.491908	Homer3	1
GO:0010562	positive regulation of phosphorus metabolic process	1/28	929/28564	0.60396	0.612305	0.491908	Crlf1	1
GO:0045937	positive regulation of phosphate metabolic process	1/28	929/28564	0.60396	0.612305	0.491908	Crlf1	1
GO:0099537	trans-synaptic signaling	1/28	932/28564	0.605163	0.612466	0.492038	Homer3	1
GO:0048609	multicellular organismal reproductive process	1/28	939/28564	0.607955	0.614233	0.493457	Cldn11	1
GO:0070925	organelle assembly	1/28	958/28564	0.615439	0.620726	0.498674	Hspa1b	1
GO:0007017	microtubule-based process	1/28	961/28564	0.616608	0.620839	0.498764	Hspa1b	1
GO:0099536	synaptic signaling	1/28	975/28564	0.622018	0.625213	0.502279	Homer3	1
GO:0032880	regulation of protein localization	1/28	981/28564	0.624314	0.626449	0.503271	Hpca	1
GO:0007417	central nervous system development	1/28	989/28564	0.627355	0.628425	0.504859	Mag	1
GO:0032504	multicellular organism reproduction	1/28	1000/28564	0.631497	0.631497	0.507326	Cldn11	1
